# Supplementary material
Source: publisher figshare collection journal article supplement (https://wiley.figshare.com/ndownloader/files/33570647)
Supplement: Supplementary file 1 [file 33570647]

Time	Liver	Kidney	Fat	PPT	RPT	Gonads	Brain	Venous Blood	Arterial Blood
0	0	0	0	0	0	0	0	0	117.5619134
1.01079E-05	0.005917554	0.01706095	0.002924742	0.001682242	0.009421467	0.002850393	0.000113112	0.000847479	117.5627534
6.06475E-05	0.035498283	0.102253298	0.01754981	0.010093871	0.056532368	0.017103109	0.000678722	0.005082351	117.5669509
0.000313346	0.183225887	0.525420787	0.090708939	0.052162374	0.292175641	0.088385371	0.003508086	0.026193916	117.5878759
0.001576836	0.917465456	2.573334207	0.457333907	0.262754826	1.472560702	0.445248374	0.017687091	0.130224251	117.6909869
0.007894288	4.479366068	11.33246803	2.309443017	1.320939573	7.422997965	2.239117375	0.089319118	0.616950888	118.1734126
0.020929388	11.27172982	23.91829961	6.212289028	3.520907486	19.89531449	5.9722639	0.240280141	1.495784149	119.0444799
0.036703776	18.57445547	33.74301955	11.04493669	6.191589877	35.2186229	10.51075087	0.427232628	2.431641888	119.9720679
0.055958231	26.33438445	42.24824204	17.06769821	9.441699756	54.13670629	16.04353615	0.66026551	3.484656024	121.015777
0.079535344	34.47002901	50.72375138	24.59743725	13.38992382	77.5210224	22.77889308	0.951667598	4.713831061	122.2340903
0.109175831	43.13513258	60.40876869	34.28138241	18.29245647	107.1801025	31.16370021	1.326534191	6.212813036	123.7198264
0.147900683	52.71024306	72.53347868	47.27673136	24.58732002	146.2903208	41.96445	1.829748756	8.121980148	125.612123
0.201142723	63.99619234	88.70722897	65.74993431	33.03404707	200.6250334	56.51798354	2.545385444	10.67367773	128.1412723
0.276413504	78.18004094	110.7507714	93.01065147	44.56839174	278.3561601	76.50212412	3.602054837	14.15230318	131.5891586
0.344179739	90.22348901	129.8290223	118.6509446	54.55593486	349.0739594	93.90791786	4.596533976	17.1651083	134.5753408
0.411945975	102.0068419	148.2015493	145.2886644	64.1818954	420.3360097	110.7711805	5.63029397	20.07165466	137.4562032
0.475691783	112.9890447	164.8926345	171.2229225	72.91964813	487.7493755	126.151549	6.637304064	22.71392999	140.0751299
0.533586834	122.9160021	179.6121184	195.4881786	80.59917726	549.2078167	139.7256283	7.579976034	25.0405693	142.3812096
0.590409587	132.6265262	193.624386	219.9418976	87.90822708	609.6756301	152.692993	8.53040857	27.25805213	144.5790975
0.652116543	143.1364011	208.3437963	247.1912366	95.59890721	675.4365546	166.3871668	9.589997256	29.59411806	146.8945206
0.719441763	154.5565987	223.8322107	277.7186627	103.7081388	747.2160129	180.8807489	10.77765771	32.06051193	149.3391199
0.785908484	165.7759	238.5769028	308.644814	111.4371513	818.0292777	194.7453487	11.9814586	34.41480248	151.6726066
0.845747652	175.8211601	251.4932638	337.1336943	118.1691472	881.671812	206.8608188	13.09093101	36.47037391	153.7100138
0.90124767	185.0863989	263.1626686	364.087079	124.2284871	940.5595369	217.796359	14.14107098	38.32428544	155.5475431
0.959400899	194.7380967	275.0015759	392.860665	130.3940969	1002.076658	228.9527954	15.26261646	40.212666	157.4192368
1.02459439	205.4839323	287.8167925	425.7445461	137.0910821	1070.764714	241.1032225	16.54497751	42.26607256	159.4544983
1.09306302	216.6786984	300.7727445	460.9702073	143.8892105	1142.531676	253.4708564	17.91935808	44.35293798	161.5229229
1.156290981	226.9266939	312.3844608	494.10529	149.9609487	1208.415888	264.5449572	19.21281702	46.22100155	163.3744792
1.21240127	235.9433132	322.5002336	523.9809079	155.1893032	1266.533362	274.1014578	20.37956636	47.83484631	164.9740631
1.267657928	244.7509632	332.1687527	553.8224818	160.1968653	1323.421011	283.2717455	21.54547635	49.38239884	166.5079405
1.329288882	254.4882112	342.5839409	587.5843827	165.6225606	1386.438241	293.2263847	22.8651353	51.06044271	168.1711562
1.397831099	265.206408	353.7337844	625.7053048	171.4662741	1455.95033	303.9690002	24.3559078	52.86944185	169.96417
1.464850421	275.5691879	364.2408679	663.542757	176.9935911	1523.299806	314.1494086	25.836351	54.58281784	171.6624056
1.523557062	284.5450499	373.3202154	697.1282193	181.6886494	1581.763258	322.811405	27.15105259	56.04432393	173.110997
1.577410621	292.6951758	381.4828312	728.2889693	185.8796208	1634.940752	330.5542363	28.37135702	57.35232281	174.4074376
1.634974393	301.3194687	389.899177	761.9588653	190.2413012	1691.290185	338.6228685	29.69047792	58.71394214	175.7570249
1.701195294	311.126765	399.2254263	801.1412888	195.1131198	1755.46563	347.6473478	31.22628671	60.2358011	177.2654358
1.7709755	321.3273386	408.6452293	842.9322986	200.0842445	1822.317965	356.8684746	32.86518495	61.78952022	178.8054253
1.833880739	330.4003444	416.9538637	881.0316727	204.4272812	1881.882635	364.9347227	34.36006112	63.15138963	180.1552605
1.888442757	338.1723673	424.1547129	914.393324	208.0912413	1932.994267	371.7469328	35.66963082	64.30671505	181.3003768
1.942564067	345.7961796	431.057913	947.768351	211.6351627	1983.1834	378.341824	36.98026608	65.42456967	182.4083534
2.0046203	354.4327249	438.6694128	986.3733213	215.5914482	2040.097758	385.7106074	38.49695059	66.67247872	183.6452352
2.074742504	364.0557005	446.909136	1030.415082	219.9288167	2103.58433	393.796739	40.2281031	68.04090801	185.0015722
2.142364063	373.1972727	454.5453596	1073.292632	223.9824563	2163.966329	401.3607366	41.91438004	69.32103092	186.2703832
2.199937369	380.8670504	461.1216596	1110.100351	227.336056	2214.711326	407.6234507	43.36263896	70.38809405	187.3280172
2.252318936	387.7576272	467.0127824	1143.823706	230.3124123	2260.349605	413.1851657	44.69009816	71.33799537	188.2695246
2.30958017	395.1983735	473.1706065	1180.93865	233.4878051	2309.662526	419.1221065	46.15167578	72.35022015	189.2728048
2.377060937	403.8427365	480.1289979	1225.002108	237.1280839	2366.997832	425.9322461	47.88771694	73.5105926	190.4229235
2.448188638	412.8094584	487.0954959	1271.814489	240.8501738	2426.517524	432.8995676	49.73304735	74.69624827	191.598102
2.510702856	420.5627682	493.1735206	1313.256639	244.0264618	2478.046569	438.8485027	51.3675297	75.71329122	192.6061578
2.563802306	427.0517478	498.4712629	1348.668623	246.6560992	2521.235445	443.7759021	52.76480903	76.56300318	193.4483612
2.61699015	433.4701806	503.5399017	1384.331067	249.2307602	2563.971785	448.6019005	54.17255102	77.39365933	194.2716772
2.679621097	440.9236638	509.2381582	1426.56344	252.1885253	2613.622766	454.1478491	55.84038558	78.34685739	195.2164522
2.751333272	449.3193947	515.4361983	1475.225397	255.479997	2669.580631	460.3216665	57.76314254	79.40666564	196.2668954
2.819458982	457.1582503	521.0599653	1521.745297	258.5158608	2721.859299	466.0179006	59.6022659	80.38432822	197.2359188
2.875937461	463.5475453	525.9783312	1560.516409	260.9657129	2764.54092	470.616149	61.13579887	81.18371282	198.0282395
2.927031426	469.248256	530.3611802	1595.748048	263.1324786	2802.647718	474.6839247	62.52992238	81.89277403	198.7310351
2.98413526	475.5350625	534.9772162	1635.296619	265.5009785	2844.676429	479.1310968	64.0955331	82.66524917	199.4966842
3.052840106	482.9794373	540.2663739	1683.113074	268.2780268	2894.460981	484.3462448	65.98938372	83.57010026	200.3935395
3.125162907	490.677181	545.4719038	1733.713668	271.1187687	2945.951771	489.6817822	67.99462112	84.49326148	201.3085431
3.187264357	497.167414	550.0168265	1777.370046	273.4911199	2989.412906	494.1383767	69.72559162	85.27061289	202.0790254
3.239095299	502.4967642	554.0529759	1813.94656	275.4243934	3025.153478	497.7707813	71.1765054	85.91304939	202.7157849
3.291544437	507.8191771	557.8731725	1851.088998	277.3408717	3060.842957	501.3717397	72.65047857	86.54690746	203.3440419
3.35472599	514.135543	562.2226598	1895.99897	279.5973414	3103.200446	505.6116691	74.43352243	87.29133928	204.0818954
3.427817071	521.3138556	566.9415773	1948.172777	282.1387173	3151.343302	510.3870465	76.50608733	88.12769522	204.9108609
3.49632585	527.9172803	571.1214988	1997.281576	284.4555832	3195.639884	514.7406017	78.45800362	88.88934159	205.6657769
3.551875179	533.1722534	574.9285797	2037.237138	286.2866707	3230.960413	518.1818193	80.04690433	89.50432247	206.2753234
3.601938485	537.8407042	578.2897191	2073.350958	287.903261	3262.349352	521.2199194	81.4836424	90.04832611	206.8145199
3.658953643	543.0845968	581.8241514	2114.597978	289.7074806	3297.595487	524.6104047	83.12530482	90.65167242	207.4125347
3.728660836	549.3882682	585.9015058	2165.191229	291.8607522	3339.965526	528.6565893	85.13998491	91.37021773	208.1247305
3.801924608	555.8896533	589.8135763	2218.554055	294.0639591	3383.654158	532.7961818	87.26618166	92.10143957	208.8494909
3.863678805	561.2631524	593.2875675	2263.674076	295.8727582	3419.805303	536.1947435	89.0649393	92.70940734	209.4520863
3.914533961	565.6120523	596.4719413	2300.922182	297.3291829	3449.113749	538.9313938	90.55055905	93.20896257	209.9472272
3.966435528	569.9922934	599.4229645	2339.02367	298.7882445	3478.614702	541.672622	92.07085001	93.70488668	210.438769
4.030033664	575.2773455	602.79656	2385.82637	300.5387302	3514.201009	544.9609656	93.93920872	94.29735554	211.0260024
4.104165513	581.3245811	606.4202592	2440.534226	302.5286252	3554.908955	548.6984787	96.12437016	94.96781731	211.6905396
4.159037704	585.7139675	609.3665318	2481.127333	303.9653862	3584.500802	551.397065	97.74661668	95.46080716	212.1791731
4.213909895	590.0376622	612.1841054	2521.803814	305.3738627	3613.648416	554.0422089	99.37292792	95.94352328	212.6576237
4.278683234	595.0590895	615.3024736	2569.923811	307.0012741	3647.492439	557.0980567	101.2977899	96.49945556	213.2086434
4.350254743	600.5055374	618.4833735	2623.219865	308.7564951	3684.190247	560.3932957	103.4308989	97.09651242	213.8004243
4.415811496	605.398352	621.3351229	2672.146587	310.3250132	3717.166451	563.3376059	105.3902417	97.63180589	214.3309876
4.470599516	609.4099764	624.0865211	2713.110215	311.6060638	3744.254843	565.7423454	107.0315136	98.07988297	214.7751053
4.522470073	613.1523498	626.576211	2751.955449	312.796448	3769.521771	567.9765633	108.5885972	98.49562107	215.1871697
4.581990432	617.3829397	629.1972304	2796.603	314.1366208	3798.069542	570.4914374	110.3790898	98.96055462	215.6479948
4.652176805	622.2836174	632.0668822	2849.347508	315.6820937	3831.128067	573.3909842	112.4954348	99.49465578	216.1773763
4.722690658	627.1135413	634.6825205	2902.438489	317.1980691	3863.693334	576.234529	114.6269311	100.015546	216.6936636
4.782089074	631.1002648	637.1969193	2947.231015	318.4450017	3890.617023	578.5733477	116.4262428	100.4536331	217.1278795
4.833395183	634.4855841	639.5446706	2985.971176	319.5007257	3913.505726	580.5534267	117.983156	100.8305131	217.5014292
4.88783198	638.0281116	641.7721848	3027.127401	320.6017912	3937.435653	582.6180752	119.637899	101.2193561	217.8868361
4.953554645	642.2354013	644.2563214	3076.883649	321.90493	3965.842585	585.0611223	121.6394266	101.6772552	218.340689
5.026520807	646.8192978	646.7257671	3132.206381	323.3192074	3996.771227	587.711841	123.8661726	102.1704991	218.8295744
5.092073042	650.8562528	648.9157879	3181.976616	324.5604653	4024.014928	590.0378565	125.8706014	102.6052983	219.2605314
5.145716247	654.0935897	651.1911634	3222.747067	325.5538282	4045.92111	591.8994676	127.51341	102.9663451	219.6183878
5.196670411	657.1255213	653.1904774	3261.511548	326.4817415	4066.424839	593.6380642	129.0760798	103.3014678	219.9505492
5.256451084	660.6309536	655.2868713	3307.036286	327.5516463	4090.109271	595.6422202	130.9121274	103.6839976	220.3296987
5.327934829	664.7481678	657.5686176	3361.533396	328.804567	4117.910065	597.9886254	133.1112607	104.1293033	220.7710694
5.399177621	668.7735549	659.5443482	3415.908804	330.0257155	4145.065391	600.2748604	135.306812	104.5590148	221.1969837
5.457891515	672.0206814	661.6013527	3460.760458	331.009043	4167.02238	602.1158907	137.1188257	104.9169448	221.5517508
5.508136953	674.7521777	663.5488101	3499.170193	331.8349277	4185.51718	603.6620895	138.6713094	105.2234422	221.8555398
5.562249809	677.6557925	665.3430302	3540.56673	332.7109061	4205.148157	605.3016022	140.3452592	105.5430154	222.1722891
5.628742753	681.1660655	667.3439707	3591.473294	333.7676123	4228.863284	607.2788936	142.4048258	105.9258322	222.5517231
5.702812647	685.0040277	669.2587285	3648.228887	334.9201261	4254.76344	609.4348013	144.7024109	106.3385608	222.9608046
5.768334973	688.3314558	670.9516608	3698.472297	335.9174039	4277.222385	611.299976	146.7375887	106.6977722	223.3168418
5.821087516	690.9534825	672.8955432	3738.94284	336.7028701	4294.986628	612.7692548	148.3777458	106.9957207	223.6121574
5.871347855	693.41888	674.5387089	3777.521478	337.4402131	4311.66969	614.1481609	149.94192	107.2718795	223.885876
5.931326205	696.3197802	676.2390725	3823.583489	338.3063666	4331.274353	615.7675096	151.8103923	107.5918067	224.2029761
6.003786406	699.7628415	678.0638416	3879.262653	339.3326543	4354.521717	617.6857214	154.070266	107.9677123	224.57556
6.07556723	703.1103168	679.5428062	3934.451449	340.3286151	4377.091087	619.5466255	156.3116294	108.3270512	224.9317235
6.13377414	705.7641539	681.2706746	3979.219088	341.1180045	4395.043669	621.0217352	158.1307937	108.6257576	225.2277904
6.183249621	707.981484	682.9301302	4017.28217	341.7772442	4410.066388	622.2536218	159.678239	108.8809289	225.4807068
6.237125351	710.3671851	684.401382	4058.744952	342.4855597	4426.195125	623.5767649	161.3646495	109.148536	225.7459492
6.304149558	713.2883257	686.0289922	4110.34394	343.3518815	4445.923922	625.194647	163.4644284	109.4728438	226.0673912
6.379001471	716.4920291	687.5108566	4167.989694	344.3007635	4467.526757	626.9661117	165.811719	109.8223538	226.4138128
6.431147581	718.6732459	689.0791397	4208.154547	344.9470853	4482.294731	628.1729582	167.4481148	110.0742493	226.6634824
6.483293692	720.8262761	690.4476887	4248.327847	345.5845007	4496.851506	629.3628546	169.0855964	110.3191793	226.906248
6.548204548	723.4664795	691.9352512	4298.344997	346.365517	4514.680089	630.8204249	171.1253567	110.6157847	227.2002324
6.62325718	726.4654489	693.3486004	4356.188516	347.251875	4534.899397	632.4740425	173.4857249	110.9472293	227.5287482
6.676832788	728.5590184	694.7924098	4397.48083	347.8710136	4549.062775	633.6292822	175.1716596	111.1902064	227.7695782
6.730408395	730.6239668	696.0940127	4438.777075	348.4813918	4563.018057	634.7679076	176.8585444	111.4275722	228.0048465
6.795400751	733.0914248	697.4749496	4488.877406	349.2103926	4579.672994	636.1274533	178.9061236	111.7079044	228.2827016
6.868751537	735.8281325	698.7605793	4545.424465	350.0185301	4598.116361	637.6341002	181.218578	112.0141006	228.586192
6.935359494	738.2663282	699.8677303	4596.773331	350.7384542	4614.541675	638.9759967	183.3197476	112.2870337	228.8567133
6.9893918	740.199307	701.3597624	4638.421315	351.3100335	4627.62866	640.041694	185.0248781	112.5187714	229.0864032
7.039779412	741.9783266	702.6226047	4677.258936	351.8360021	4639.660003	641.0221229	186.6156779	112.7300278	229.2957929
7.098595918	744.0288511	703.8330005	4722.592006	352.4420272	4653.499264	642.151419	188.4734231	112.9684288	229.5320872
7.169736545	746.4688388	705.091698	4777.41921	353.1631206	4669.944955	643.4947581	190.7215231	113.2488589	229.8100393
7.241878977	748.9010668	706.0502276	4833.01215	353.8818185	4686.30345	644.833142	193.0024594	113.5225499	230.0813118
7.301493416	750.865948	707.2873044	4878.939549	354.4632804	4699.566765	645.9161288	194.8879333	113.7556087	230.3123111
7.351686693	752.489593	708.6233152	4917.60011	354.9443769	4710.559174	646.8122944	196.4758568	113.9563299	230.5112587
7.404910882	754.1933205	709.7206896	4958.590579	355.4490327	4722.059165	647.7519768	198.1602439	114.1603438	230.7134697
7.470525397	756.2638116	710.872138	5009.113945	356.0624408	4736.012776	648.8938356	200.2374498	114.4048626	230.9558279
7.544891851	758.5721562	711.8775155	5066.36243	356.7464647	4751.536127	650.1666918	202.5926086	114.6720766	231.2206805
7.598162541	760.1877627	713.0751979	5107.355779	357.2262256	4762.452428	651.0596795	204.2800103	114.8717179	231.4185577
7.651433231	761.7832201	714.1198349	5148.339955	357.7001439	4773.21591	651.9415607	205.9678313	115.0662572	231.611378
7.716281517	763.6986538	715.1924126	5198.218094	358.2693278	4786.116055	653.0004096	208.0230028	115.2964019	231.839489
7.789873291	765.8377404	716.1362087	5254.80231	358.905278	4800.491821	654.1830527	210.3559243	115.5485825	232.0894412
7.856813499	767.7487506	716.9214929	5306.251988	359.4739697	4813.325605	655.2403804	212.4784818	115.7736347	232.3125047
7.910871959	769.2545657	718.1943684	5347.780631	359.9234141	4823.506985	656.0763706	214.1926858	115.9674214	232.5045789
7.961009989	770.6343221	719.2514277	5386.28576	360.3354626	4832.822555	656.8426146	215.7828241	116.1430075	232.6786135
8.019551069	772.2276569	720.2129636	5431.230271	360.8114152	4843.550051	657.7273716	217.639785	116.3403433	232.8742055
8.090685372	774.1349052	721.1791953	5485.820333	361.3815918	4856.368102	658.7869649	219.8965739	116.573256	233.10506
8.163164615	776.0485055	721.8339813	5541.416366	361.9540564	4869.191459	659.8503747	222.1964223	116.8006694	233.3304639
8.223008184	777.5923436	722.8302874	5587.293733	362.41719	4879.585024	660.7109028	224.0953731	116.9963329	233.5243984
8.273107196	778.8597417	723.9948272	5625.681743	362.7983316	4888.153189	661.4192487	225.6851164	117.1659521	233.6925187
8.326035914	780.1874086	724.8951475	5666.223861	363.1976143	4897.092477	662.1609701	227.3648363	117.3366283	233.8616867
8.391435744	781.8069893	725.804446	5716.295737	363.6850885	4907.974291	663.0662402	229.4404868	117.5412327	234.0644831
8.465968749	783.6257623	726.5417856	5773.328639	364.2330305	4920.160386	664.0834092	231.8061768	117.7654456	234.2867147
8.519339639	784.8972997	727.5538548	5814.141586	364.617418	4928.731279	664.7972254	233.5000581	117.9349643	234.4547355
8.572710528	786.1545102	728.417856	5854.936108	364.997795	4937.188968	665.5033963	235.1939851	118.0999742	234.6182873
8.637593914	787.6639916	729.2714255	5904.504846	365.4549367	4947.321401	666.3518179	237.2533396	118.2945959	234.8111892
8.711091566	789.3496209	729.967723	5960.620009	365.965995	4958.605164	667.2999494	239.5861167	118.506964	235.0216807
8.777921426	790.8568022	730.5390672	6011.610109	366.4237545	4968.685755	668.1490146	241.7071792	118.6967376	235.2097773
8.831980301	792.0447702	731.646877	6052.826368	366.7861458	4976.700043	668.8215804	243.4226245	118.8629507	235.3745217
8.882206946	793.1366315	732.5526904	6091.101548	367.1195548	4984.05213	669.440194	245.0164081	119.0136303	235.5238698
8.940834699	794.3993584	733.33888	6135.755822	367.5053653	4992.52448	670.1557442	246.8767264	119.182339	235.6910877
9.01195762	795.9108408	734.0921395	6189.891751	367.9677927	5002.642601	671.0131181	249.1333737	119.3808377	235.8878323
9.084316498	797.4282616	734.5336981	6244.928563	368.4325743	5012.763185	671.874474	251.429056	119.5737333	236.0790234
9.144088157	798.652354	735.3675657	6290.354873	368.8090107	5020.976195	672.5723482	253.3250121	119.7418135	236.2456183
9.194226508	799.6588867	736.3973256	6328.433984	369.1196133	5027.764701	673.1483516	254.9151178	119.8889876	236.3914919
9.247255793	800.7167438	737.1565946	6368.687781	369.4460975	5034.862834	673.7534932	256.5968119	120.0364838	236.5376847
9.312719761	802.0081509	737.8923136	6418.348357	369.8451348	5043.504983	674.4928669	258.6726054	120.2128101	236.7124529
9.387185341	803.4587182	738.4309501	6474.793727	370.2939375	5053.177928	675.3241005	261.0334913	120.4050913	236.903035
9.440528664	804.472238	739.3142673	6515.193793	370.608999	5059.988717	675.9079157	262.7242585	120.5525106	237.0491517
9.493871987	805.4759573	740.0484786	6555.569113	370.9213594	5066.716713	676.4865493	264.414805	120.6957415	237.1911169
9.558741316	806.6835837	740.7445147	6604.634607	371.2976432	5074.788933	677.183364	266.4703143	120.8643896	237.3582747
9.632258729	808.0356525	741.2627894	6660.195884	371.7195293	5083.795394	677.9643098	268.79941	121.0480118	237.5402743
9.699117343	809.2466469	741.6737057	6710.680762	372.098248	5091.853416	678.6651965	270.9170555	121.2122266	237.703038
9.753178801	810.1991022	742.6663512	6751.46603	372.3978691	5098.260795	679.2201105	272.628798	121.3583908	237.8479106
9.803383981	811.0754567	743.4652769	6789.317628	372.6738848	5104.14231	679.7311608	274.2181663	121.49067	237.9790209
9.861987465	812.091172	744.1244465	6833.471966	372.9939851	5110.928534	680.3235665	276.0730946	121.6381872	238.1252345
9.933108384	813.3098049	744.7246369	6887.013425	373.3786331	5119.04719	681.0351863	278.3237008	121.8115339	238.2970495
10.00549493	814.5367993	745.0089983	6941.458301	373.7664098	5127.184076	681.7522459	280.6137699	121.9793913	238.4634236
10.06528613	815.5259308	745.7221347	6986.386038	374.0806271	5133.792885	682.3335475	282.504679	122.1273623	238.610087
10.11541704	816.3383533	746.6591406	7024.024178	374.3398635	5139.256892	682.8133281	284.0895884	122.2580622	238.739632
10.16842167	817.1941763	747.3166147	7063.794387	374.612914	5144.975886	683.3183791	285.7650563	122.3882718	238.868691
10.23386682	818.2412025	747.9264418	7112.860314	374.9473895	5151.949442	683.9368234	287.8332526	122.543632	239.0226783
10.30834471	819.4206756	748.3217352	7168.646134	375.3246798	5159.770839	684.6341146	290.1861956	122.7125968	239.1901501
10.36169683	820.2438931	749.1105691	7208.568289	375.5895942	5165.282525	685.1240176	291.8710353	122.8437873	239.3201812
10.41504895	821.0606284	749.7505063	7248.461332	375.8527193	5170.733888	685.6104521	293.5554629	122.9710349	239.4463044
10.4799211	822.0451456	750.3317514	7296.928716	376.1702952	5177.282567	686.1973367	295.6030299	123.1205444	239.5944928
10.55342947	823.1498945	750.7196727	7351.795607	376.5271491	5184.599821	686.8565199	297.9224109	123.2828578	239.7553719
10.62027763	824.1410377	751.0148326	7401.640691	376.8481065	5191.156245	687.4492682	300.0308562	123.4281211	239.8993516
10.67433904	824.9191739	751.9232611	7441.910319	377.1019736	5196.373812	687.9185354	301.7352211	123.5594353	240.0295054
10.7245526	825.6365271	752.6439531	7479.285814	377.3362869	5201.169879	688.351526	303.3178462	123.6781382	240.1471594
10.78316436	826.469949	753.2104518	7522.8791	377.6086	5206.711315	688.8544864	305.1646683	123.8100117	240.2778676
10.85428387	827.471871	753.698195	7575.725256	377.9364635	5213.34994	689.459828	307.4048101	123.9646846	240.4311737
10.92665831	828.4833213	753.8674884	7629.448074	378.2677868	5220.014436	690.0712375	309.6835999	124.1138683	240.5790391
10.98644227	829.2981342	754.493497	7673.776627	378.5363803	5225.433119	690.5671674	311.5650603	124.2468655	240.710861
11.03657716	829.9670723	755.3620025	7710.916571	378.7580905	5229.917844	690.9767351	313.1422145	124.3653159	240.8282647
11.08959208	830.6738645	755.9449035	7750.161396	378.992183	5234.619314	691.4088951	314.8095304	124.4827197	240.9446311
11.15504369	831.540358	756.4622666	7798.569635	379.2794779	5240.360055	691.9390693	316.8672641	124.6224987	241.0831749
11.22951427	832.5188841	756.7514207	7853.590497	379.6042604	5246.808938	692.5381309	319.2075773	124.7740132	241.2333505
11.28286361	833.2010334	757.4717575	7892.962822	379.8323328	5251.357766	692.9591212	320.8832764	124.8930829	241.3513681
11.33621295	833.879164	758.0426724	7932.303104	380.0592682	5255.862909	693.3778659	322.5584263	125.0083707	241.4656371
11.40108385	834.698427	758.5395088	7980.096096	380.3337087	5261.283222	693.8840732	324.5945984	125.1435589	241.5996307
11.47459419	835.6201869	758.831089	8034.196335	380.6428128	5267.350717	694.4539532	326.9009386	125.2899303	241.7447087
11.54144492	836.4486976	759.03993	8083.340336	380.9213431	5272.796364	694.9673588	328.9973372	125.4209908	241.8746111
11.5955064	837.0976962	759.8872663	8123.038437	381.1415299	5277.132774	695.3736512	330.6917504	125.5411852	241.9937434
11.64571811	837.6971188	760.5509079	8159.879325	381.345087	5281.124039	695.7491372	332.2649591	125.6496912	242.1012905
11.70432805	838.3953565	761.0491129	8202.84607	381.5821466	5285.742633	696.1861861	334.1006664	125.7697951	242.2203332
11.77544754	839.2367245	761.4537476	8254.929645	381.8681452	5291.28504	696.7132595	336.3271987	125.9104252	242.3597206
11.84782404	840.088634	761.5370827	8307.873683	382.1578706	5296.859903	697.2469031	338.5919951	126.0455552	242.4936564
11.90760934	840.774348	762.0985139	8351.555443	382.3928068	5301.397451	697.6799208	340.4617269	126.1672782	242.6143038
11.95774374	841.3368415	762.9174223	8388.149627	382.5867665	5305.156098	698.0376235	342.0288874	126.2765037	242.7225641
12.01075723	841.932993	763.44539	8426.814628	382.7920107	5309.102523	698.4158673	343.6855046	126.3842267	242.8293352
12.0762078	842.665527	763.8942633	8474.504705	383.0443745	5313.928904	698.8807596	345.7299093	126.5122211	242.9561987
12.15067908	843.4951161	764.1043837	8528.706079	383.3303162	5319.360926	699.4072356	348.0549268	126.6505436	243.0932988
12.204029	844.0726501	764.7741912	8567.488976	383.5311058	5323.196085	699.7772477	349.7195484	126.7604471	243.2022312
12.25737891	844.6479766	765.2940592	8606.237914	383.7312262	5326.999792	700.1458903	351.3835223	126.8666812	243.3075266
12.3222503	845.3446248	765.7281585	8653.309185	383.9736776	5331.58334	700.5923301	353.4059683	126.9910092	243.4307559
12.39576033	846.13054	765.9476971	8706.587743	384.2473301	5336.723567	701.0959769	355.6965598	127.1252639	243.5638243
12.46261033	846.8382732	766.09204	8754.981277	384.4943313	5341.3448	701.550482	357.7784701	127.2455178	243.6830155
12.51667169	847.3913593	766.8944362	8794.070828	384.6894776	5345.027253	701.9100035	359.4610764	127.3572611	243.7937714
12.56688417	847.9032089	767.5159097	8830.345627	384.8701656	5348.421326	702.2427761	361.0232655	127.458012	243.893632
12.62549522	848.501045	767.9632798	8872.649971	385.0809972	5352.355012	702.6308389	362.8460206	127.5691511	244.003789
12.69661498	849.2231109	768.3057068	8923.926471	385.3358167	5357.083438	703.0996817	365.0566659	127.6990624	244.1325523
12.76899039	849.956408	768.3242982	8976.04546	385.5945262	5361.848777	703.5754022	367.3051023	127.8234405	244.2558313
12.82877482	850.5461043	768.8377601	9019.043686	385.8043463	5365.731551	703.961522	369.1612084	127.9365433	244.3679348
12.87890969	851.0294327	769.6201012	9055.064146	385.9775928	5368.950708	704.280553	370.7169025	128.0387182	244.4692068
12.93192471	851.5433058	770.1071467	9093.121924	386.1613001	5372.336139	704.6185868	372.3613534	128.1390322	244.5686343
12.99737652	852.1761851	770.5047039	9140.060062	386.3875645	5376.482911	705.0347529	374.390615	128.2579916	244.6865425
13.07184714	852.8949114	770.6551356	9193.402051	386.6444506	5381.158679	705.5069861	376.6982035	128.3861733	244.8135915
13.12519669	853.3945339	771.2875021	9231.567867	386.824812	5384.462906	705.838868	378.3502549	128.4890379	244.9155471
13.17854624	853.8932826	771.7692743	9269.698539	387.004843	5387.744665	706.1700139	380.0015884	128.5883085	245.0139405
13.24341785	854.4985822	772.1562496	9316.016952	387.2233156	5391.705456	706.5716995	382.0085921	128.7042712	245.1288785
13.3169287	855.1832769	772.3212637	9368.440819	387.4703782	5396.15544	707.0257206	384.2815822	128.8291767	245.2526803
13.38377925	855.8009877	772.4166171	9416.055206	387.693713	5400.162806	707.4360592	386.3473719	128.9410795	245.3635943
13.4378406	856.2825315	773.1858015	9454.513096	387.8700415	5403.358086	707.7604704	388.0168512	129.0463022	245.4678871
13.48805295	856.7290347	773.7759123	9490.200219	388.0335305	5406.307102	708.0611537	389.5667871	129.1410594	245.561807
13.54666421	857.2519378	774.1850417	9531.817781	388.2246258	5409.730232	708.412394	391.3751819	129.2452558	245.6650826
13.61778447	857.8849476	774.4803823	9582.259606	388.4559694	5413.851762	708.8374393	393.5683124	129.3668535	245.7856059
13.69016028	858.5296863	774.449462	9633.527502	388.6913107	5418.013376	709.269565	395.798815	129.4828744	245.9006015
13.74994527	859.0476532	774.9267741	9675.821639	388.8821896	5421.407644	709.6203544	397.6400331	129.5892801	246.006067
13.80008015	859.471795	775.6821168	9711.250513	389.0397967	5424.22407	709.9102181	399.183173	129.6859803	246.1019126
13.85309505	859.9241341	776.1383949	9748.68189	389.2072303	5427.190541	710.2179016	400.8142926	129.7805247	246.1956216
13.91854695	860.4824681	776.4970675	9794.845816	389.4137622	5430.829643	710.597268	402.8270297	129.8924367	246.3065446
13.99301804	861.1182546	776.6018583	9847.305857	389.6486694	5434.940387	711.0285139	405.1157326	130.0126946	246.42574
14.0463679	861.5595492	777.2061659	9884.838967	389.8135615	5437.847752	711.3315532	406.754191	130.1100635	246.5222484
14.09971775	862.0009505	777.6591931	9922.336275	389.9783696	5440.739236	711.634317	408.3918817	130.2038886	246.6152444
14.16458985	862.5378132	778.0103326	9967.883755	390.1786571	5444.23417	712.0020991	410.3822336	130.3132968	246.7236859
14.23810105	863.1466384	778.1335097	10019.43281	390.4055347	5448.167547	712.4184896	412.6362634	130.4308599	246.84021
14.30495167	863.6968385	778.1912021	10066.25052	390.610886	5451.715244	712.7953048	414.684726	130.5361942	246.9446135
14.35901312	864.1246922	778.9356023	10104.06349	390.7729012	5454.545574	713.0930401	416.3401406	130.6362972	247.043832
14.40922589	864.522142	779.5021319	10139.15137	390.9233003	5457.161093	713.3693286	417.8769821	130.7263414	247.1330805
14.46783783	864.9887773	779.8821388	10180.06904	391.099364	5460.201497	713.6925559	419.6700499	130.8250665	247.2309332
14.53895857	865.5548803	780.1413395	10229.66059	391.3128108	5463.867839	714.0842503	421.844503	130.9400987	247.3449489
14.6113343	866.1330519	780.0720079	10280.062	391.5303192	5467.576385	714.4831452	424.0559057	131.0495023	247.4533857
14.67111974	866.5970614	780.5217976	10321.64013	391.7067275	5470.603864	714.8069748	425.881305	131.1506089	247.553599
14.72125488	866.9766539	781.2569934	10356.46808	391.8523757	5473.117779	715.0745616	427.4111367	131.2429802	247.645154
14.77427002	867.3826654	781.6898503	10393.26364	392.007358	5475.769432	715.3590508	429.028146	131.3329506	247.7343294
14.83972221	867.8848503	782.0186496	10438.64211	392.1987791	5479.02687	715.7102697	431.0234108	131.4392639	247.8397032
14.9141936	868.4581309	782.0879862	10490.20785	392.4168379	5482.712577	716.1101327	433.2921661	131.5532108	247.9526432
14.9675438	868.85543	782.6710625	10527.09998	392.5698574	5485.321234	716.3910625	434.9162936	131.6462077	248.0448183
15.020894	869.2535579	783.1021345	10563.95603	392.7229732	5487.918836	716.6720531	436.5396185	131.7356927	248.1335126
15.08576655	869.7387554	783.4256399	10608.72342	392.9092812	5491.062798	717.0138038	438.5124569	131.8398663	248.2367656
15.15927813	870.2902736	783.516207	10659.38798	393.1206263	5494.60674	717.4012725	440.7465771	131.9515508	248.3474632
15.22612896	870.7894479	783.5444494	10705.40085	393.3121242	5497.807709	717.7522947	442.7768756	132.0516171	248.4466454
15.28019063	871.1766801	784.2701922	10742.56274	393.4630988	5500.362583	718.0294795	444.417565	132.1476227	248.5418025
15.33040384	871.5369994	784.8188022	10777.04587	393.6033927	5502.726262	718.2869595	445.940708	132.233888	248.6273056
15.38901639	871.9610263	785.1763172	10817.25752	393.7678433	5505.477507	718.5885718	447.7177552	132.3282153	248.7207993
15.4601376	872.4764359	785.4073492	10865.99195	393.9674495	5508.799735	718.9545066	449.8727121	132.4379585	248.8295728
15.5325134	873.0041427	785.3076822	10915.52061	394.1711521	5512.165544	719.3277076	452.0642098	132.5420165	248.9327112
15.59229934	873.4272054	785.7362174	10956.37792	394.3363424	5514.915353	719.630664	453.8731399	132.6388457	249.0286848
15.6424348	873.7729614	786.4562517	10990.60123	394.4727091	5517.200118	719.8809844	455.3891304	132.7277252	249.1167789
15.69545023	874.1437739	786.8710336	11026.75732	394.6180208	5519.613182	720.1474827	456.9914763	132.8139952	249.2022866
15.76090272	874.6032742	787.176523	11071.34618	394.7976945	5522.581195	720.4768481	458.9686007	132.9157689	249.303161
15.83537446	875.1290077	787.2178348	11122.01342	395.0026404	5525.944356	720.8523186	461.2166694	133.0245849	249.4110154
15.88872531	875.4928046	787.7846386	11158.26209	395.1464075	5528.326171	721.1160412	462.8259584	133.1140322	249.4996723
15.94207616	875.8579631	788.1987001	11194.47465	395.2904031	5530.700472	721.3800714	464.4344204	133.1999866	249.5848671
16.00694881	876.3037698	788.5005501	11238.45913	395.4657943	5533.577551	721.7015215	466.3891334	133.299891	249.6838888
16.08046012	876.811564	788.565259	11288.23627	395.6649951	5536.825124	722.0664081	468.6026616	133.4067687	249.789822
16.14731112	877.271778	788.5700692	11333.44246	395.8456493	5539.762038	722.3972683	470.6142095	133.5025204	249.8847276
16.20137356	877.627959	789.2815736	11369.95244	395.9879704	5542.10699	722.6583686	472.2397273	133.595177	249.9765654
16.25158766	877.9598792	789.8163812	11403.83023	396.1203367	5544.278628	722.9011139	473.748765	133.6783485	250.059002
16.31020078	878.3512971	790.1562414	11443.33506	396.2756672	5546.809212	723.1857751	475.5093098	133.7690649	250.1489167
16.38132193	878.8278792	790.3649285	11491.21146	396.4643901	5549.868621	723.5314828	477.6441874	133.8744547	250.2533753
16.4536975	879.3169055	790.2408627	11539.86701	396.6572237	5552.972446	723.8844842	479.8152105	133.9741003	250.3521403
16.51348415	879.7085479	790.6527005	11580.00382	396.8135701	5555.509837	724.1710087	481.6072268	134.0674015	250.4446171
16.56362042	880.028314	791.3611827	11613.62317	396.9426108	5557.61918	724.4077204	483.109021	134.1534037	250.5298593
16.61663638	880.3720767	791.7617906	11649.14053	397.0802824	5559.849473	724.6600262	484.6963283	134.2366149	250.6123352
16.68208898	880.7987493	792.0487653	11692.94065	397.2506641	5562.595584	724.972131	486.654846	134.3346268	250.709481
16.75656063	881.2878847	792.0675015	11742.71061	397.4452242	5565.711219	725.32831	488.8817059	134.4391786	250.813109
16.80991248	881.6258636	792.6216397	11778.31735	397.5816529	5567.918817	725.5784057	490.4758113	134.5256804	250.8988464
16.86326433	881.9655982	793.0222984	11813.88817	397.718408	5570.121496	725.8289912	492.0690736	134.6086991	250.9811315
16.92813696	882.3810037	793.3068632	11857.09174	397.8851211	5572.793273	726.1343279	494.005246	134.7050448	251.0766257
17.00164748	882.8550211	793.3506564	11905.98385	398.0746543	5575.812631	726.4812649	496.1977146	134.8079041	251.1785761
17.06849846	883.2851096	793.3364533	11950.386	398.2466645	5578.546022	726.7960777	498.1901062	134.9000425	251.2699004
17.12256215	883.6172487	794.036934	11986.24679	398.3820779	5580.729043	727.0443583	499.8001522	134.9899009	251.3589647
17.17277753	883.9271646	794.5609452	12019.52191	398.5081094	5582.75243	727.2753475	501.2948095	135.0704829	251.4388346
17.2313911	884.2932972	794.8866898	12058.32284	398.6561432	5585.112517	727.5464678	503.0385227	135.1581678	251.5257447
17.30251172	884.7397431	795.0773007	12105.34482	398.8361466	5587.968647	727.8759952	505.1529227	135.2598936	251.6265716
17.37488682	885.1987212	794.9331996	12153.1314	399.0202605	5590.869634	728.2128166	507.3030855	135.3558149	251.7216453
17.43467442	885.5659226	795.3316674	12192.55163	399.1695011	5593.242404	728.4861596	509.0778912	135.4461406	251.8111729
17.48481191	885.8654474	796.0312285	12225.57057	399.2926478	5595.215681	728.71194	510.5652525	135.5297184	251.8940121
17.53782856	886.1881305	796.4205179	12260.45293	399.4241661	5597.304089	728.9528336	512.1372691	135.610344	251.9739252
17.60328105	886.589197	796.6924928	12303.46885	399.5870539	5599.877763	729.2510406	514.0768647	135.7051679	252.0679112
17.67775222	887.049757	796.69266	12352.34689	399.773226	5602.800833	729.5916639	516.2821643	135.8060956	252.167947
17.73110534	887.3675489	797.2367663	12387.31604	399.9037191	5604.872766	729.8307555	517.8608573	135.8900978	252.2512069
17.78445845	887.6873893	797.6266632	12422.24959	400.0346112	5606.941691	730.070472	519.4386965	135.9706202	252.3310178
17.84933105	888.0789826	797.8971481	12464.67768	400.1942876	5609.453292	730.3627645	521.3560553	136.063932	252.423505
17.92284049	888.5265149	797.9236558	12512.69097	400.3759698	5612.294383	730.6951481	523.5271563	136.1633561	252.5220506
17.98969123	888.9329536	797.8936912	12556.29496	400.5409494	5614.868611	730.9969302	525.5001227	136.2524003	252.6103079
18.04375633	889.2461877	798.5855052	12591.51166	400.6707353	5616.924863	731.2347844	527.0944939	136.3398675	252.6970022
18.09397325	889.5387873	799.1009149	12624.18902	400.7916004	5618.832095	731.4562021	528.5745908	136.4182327	252.774675
18.1525874	889.8850057	799.4151399	12662.29182	400.9336764	5621.058464	731.7162847	530.301263	136.5033154	252.8590058
18.22370734	890.3076898	799.5908089	12708.4664	401.1065492	5623.754969	732.0326025	532.3949313	136.6018879	252.9567073
18.2960817	890.7429498	799.4298843	12755.3913	401.2835216	5626.49648	732.3561943	534.5239813	136.694595	253.0485951
18.3558702	891.0908269	799.8174407	12794.10117	401.4269324	5628.739663	732.618741	536.2813777	136.7823546	253.1355793
18.4060091	891.3743262	800.5100005	12826.5252	401.5452365	5630.605725	732.8355559	537.7541513	136.8638434	253.2163479
18.45902668	891.6803097	800.8900637	12860.77849	401.6716945	5632.582232	733.0670801	539.3107192	136.9422344	253.2940463
18.52447912	892.0610693	801.1496227	12903.01757	401.8284108	5635.019754	733.353861	541.2311975	137.0342962	253.3852946
18.5989496	892.4989409	801.1341677	12951.01204	402.0076637	5637.790574	733.6816746	543.4147147	137.1320752	253.4822095
18.65230394	892.8006758	801.6701829	12985.34975	402.1332521	5639.755114	733.9116889	544.9778438	137.2139088	253.5633199
18.70565828	893.1046782	802.0512588	13019.65227	402.2592939	5641.718051	734.1424291	546.5401128	137.2922609	253.6409797
18.77053092	893.4772956	802.3100243	13061.31272	402.4131414	5644.102586	734.4239348	548.4384888	137.3829293	253.7308469
18.84403938	893.903697	802.3219197	13108.45627	402.58831	5646.802072	734.7442652	550.5880397	137.4793522	253.8264178
18.91088993	894.291241	802.2785787	13151.27045	402.7474473	5649.249696	735.0352374	552.5414188	137.5656883	253.9119909
18.96495633	894.5893401	802.963472	13185.8498	402.8725477	5651.204978	735.2644258	554.119984	137.6510672	253.9966154
19.01517473	894.8680639	803.4718954	13217.93573	402.9891063	5653.019598	735.4778791	555.5854029	137.727493	254.0723659
19.07378949	895.1983116	803.7765128	13255.34801	403.1262107	5655.139243	735.7287669	557.2949048	137.8102931	254.1544343
19.14490886	895.6019172	803.9395529	13300.68462	403.2931244	5657.708182	736.0340644	559.3676938	137.9060934	254.2493881
19.21728258	896.0181103	803.7641682	13346.75757	403.4641192	5660.322063	736.3466018	561.4754858	137.9959667	254.3384672
19.27707187	896.350422	804.142629	13384.76508	403.6026409	5662.461384	736.6001101	563.2153528	138.0814658	254.4232107
19.32721211	896.6209916	804.8296055	13416.60096	403.7168774	5664.24141	736.8094075	564.6734406	138.1611155	254.5021567
19.38023062	896.9134929	805.2019844	13450.23249	403.8390807	5666.128035	737.033068	566.2144624	138.2375338	254.5778996
19.44568311	897.2778407	805.4510362	13491.7039	403.9906013	5668.456059	737.3102462	568.1157111	138.327152	254.6667259
19.52015298	897.6973522	805.4221381	13538.8254	404.1640201	5671.104258	737.6272774	570.2773238	138.4221379	254.7608725
19.57350844	897.9860661	805.9514934	13572.5392	404.2854647	5672.982173	737.8496362	571.8247994	138.5020502	254.8400786
19.62686391	898.2772125	806.32518	13606.21828	404.4074039	5674.859524	738.0727973	573.3714117	138.578476	254.915829
19.69173662	898.63441	806.5739718	13647.12054	404.5563147	5677.141327	738.3451831	575.2507097	138.6667931	255.0033657
19.7652443	899.043619	806.5732372	13693.40529	404.7259585	5679.72616	738.6553078	577.3786125	138.7605403	255.0962845
19.83209477	899.4157666	806.5182846	13735.43966	404.8801321	5682.071122	738.9371115	579.312318	138.8444578	255.1794605
19.88616236	899.7015041	807.197545	13769.38965	405.0012436	5683.9444	739.1589354	580.8750042	138.9279756	255.2622403
19.93638208	899.9688835	807.7001738	13800.89161	405.1141317	5685.683723	739.3656124	582.3256781	139.0026697	255.3362743
19.99499742	900.2860626	807.9965987	13837.62222	405.2469939	5687.716495	739.6086682	584.0179395	139.083427	255.416318
20.06611636	900.6740368	808.1487268	13882.13186	405.4088159	5690.181452	739.9045655	586.0697741	139.1767415	255.508808
20.13848959	901.0745878	807.9606388	13927.36415	405.5746952	5692.691138	740.207659	588.1562376	139.2640672	255.595362
20.19827964	901.3941023	808.3313459	13964.67858	405.7090247	5694.745529	740.4534307	589.8785148	139.3475354	255.6780926
20.24842109	901.6540223	809.0137857	13995.93406	405.8197677	5696.455106	740.656283	591.3218655	139.4255343	255.7554022
20.30144045	901.935411	809.3796218	14028.95212	405.9383134	5698.268051	740.8731949	592.847291	139.5001767	255.8293851
20.36689302	902.2862159	809.6195837	14069.66629	406.0853618	5700.506201	741.1421216	594.7292563	139.5875912	255.9160271
20.44136245	902.6905574	809.5788672	14115.92683	406.2537514	5703.053599	741.4498738	596.8689111	139.6800524	256.0076713
20.49471894	902.968488	810.1026188	14149.02521	406.3716169	5704.860186	741.6656319	598.4006911	139.7582298	256.0851579
20.54807544	903.2489768	810.4699766	14182.08941	406.4900085	5706.666982	741.8822504	599.931607	139.8329132	256.1591813
20.61294829	903.5933766	810.7100926	14222.24407	406.6346452	5708.863982	742.1467539	601.7917871	139.9190998	256.2446063
20.68645534	903.9882976	810.6982074	14267.68218	406.7994988	5711.354025	742.4480444	603.8980041	140.0104174	256.335117
20.75330596	904.3476304	810.6329504	14308.9479	406.9493621	5713.613977	742.7218998	605.8120073	140.0921354	256.4161129
20.80737462	904.6230526	811.3075356	14342.27739	407.0670025	5715.419235	742.9373262	607.3587839	140.1739638	256.4972182
20.85759538	904.8809546	811.8052558	14373.20352	407.1766928	5717.096019	743.1381094	608.7946817	140.2470833	256.5696916
20.91621114	905.1872067	812.0945414	14409.26217	407.3058554	5719.056557	743.3743462	610.469674	140.3259794	256.6478906
20.98732981	905.5620947	812.2370412	14452.95689	407.4632312	5721.434931	743.6620488	612.5005333	140.4170255	256.7381321
21.05970287	905.9495339	812.0375615	14497.36095	407.6246374	5723.857719	743.9568979	614.5656552	140.5020211	256.8223766
21.11949374	906.2582966	812.4015087	14533.99247	407.7552943	5725.841156	744.1959029	616.2703276	140.5836329	256.9032673
21.1696362	906.5092511	813.0801916	14564.67595	407.8629717	5727.491787	744.3931087	617.6989236	140.6601236	256.979082
21.2226562	906.7812775	813.4403357	14597.08944	407.9783045	5729.243012	744.6041023	619.2087356	140.7331398	257.051453
21.28810882	907.1206602	813.6722681	14637.05758	408.1214202	5731.405778	744.8657847	621.0714058	140.818533	257.1360916
21.36257803	907.5121907	813.6209541	14682.47016	408.2853816	5733.868497	745.1653798	623.1891013	140.9086743	257.2254364
21.4159355	907.7809934	814.1398842	14714.96232	408.4000898	5735.615061	745.3753244	624.7051794	140.9852589	257.3013443
21.46929297	908.052451	814.5017027	14747.42084	408.5153486	5737.36241	745.5861743	626.2203943	141.0583401	257.3737796
21.53416601	908.3859935	814.7341141	14786.83925	408.6562064	5739.487861	745.8437198	628.0614576	141.1425648	257.4572601
21.60767256	908.7687762	814.7121911	14831.44367	408.8168191	5741.897802	746.1372013	630.145995	141.2316409	257.545549
21.67452334	909.1172045	814.6376273	14871.95249	408.9628604	5744.085794	746.4040199	632.0403008	141.3113271	257.6245311
21.72859297	909.3838272	815.3082402	14904.67091	409.0774174	5745.833378	746.6137723	633.5711699	141.3915974	257.7040921
21.7788147	909.6336364	815.8017053	14935.03003	409.1842642	5747.457074	746.8093229	634.9922956	141.4632627	257.7751241
21.83743091	909.930549	816.0846398	14970.4271	409.310134	5749.356216	747.0394999	636.6500288	141.540437	257.8516165
21.90854941	910.2942375	816.2184753	15013.31962	409.4635476	5751.660889	747.3199107	638.6599298	141.6293813	257.9397748
21.98092236	910.6704398	816.0086044	15056.90839	409.6209622	5754.009587	747.6074137	640.7037284	141.712214	258.0218755
22.04071397	910.9699672	816.3665429	15092.86763	409.748336	5755.932421	747.840379	642.3908094	141.7921034	258.101059
22.09085736	911.2132066	817.0420378	15122.98803	409.8532692	5757.532634	748.0325379	643.8046624	141.8671955	258.1754875
22.14387798	911.4771708	817.3971247	15154.80646	409.9657238	5759.23101	748.2382375	645.298877	141.9387008	258.2463609
22.20933071	911.8067062	817.6218247	15194.0404	410.1053125	5761.329139	748.4934325	647.1422768	142.0222135	258.3291356
22.28379979	912.1871773	817.5608379	15238.61853	410.2652975	5763.719135	748.7857133	649.2380434	142.1101927	258.4163374
22.33715815	912.4480817	818.0755326	15270.51404	410.3771657	5765.414064	748.9904362	650.7384384	142.1852941	258.4907752
22.39051651	912.7117168	818.4324048	15302.37649	410.4896038	5767.11021	749.1960998	652.2379722	142.2568814	258.5617299
22.45538977	913.0358446	818.6578452	15341.07044	410.6270559	5769.173954	749.4473831	654.0599489	142.3392746	258.643395
22.52889595	913.4080881	818.6267306	15384.85466	410.7838417	5771.514702	749.733828	656.1228466	142.426255	258.7296068
22.59574694	913.7470333	818.5436168	15424.61881	410.9264296	5773.640433	749.9942971	657.9974908	142.5040396	258.8067041
22.64981746	914.0059852	819.2107813	15456.736	411.038196	5775.338034	750.1989214	659.5124792	142.5828533	258.8848214
22.70004007	914.2487322	819.7004814	15486.53722	411.1424669	5776.915666	750.3897382	660.9188579	142.6531579	258.9545047
22.75865669	914.5374877	819.9776605	15521.28345	411.2653512	5778.761475	750.6144286	662.5593653	142.7287186	259.0293977
22.8297751	914.8913824	820.1035653	15563.38688	411.4151685	5781.002031	750.88823	664.5483536	142.815691	259.1156015
22.90214803	915.2577457	819.8840693	15606.17376	411.568956	5783.286172	751.1690664	666.5708778	142.896491	259.1956876
22.96194036	915.5491694	820.2365642	15641.47171	411.6933419	5785.156115	751.3965421	668.2404058	142.9747627	259.2732676
23.0120846	915.7856266	820.9092963	15671.03823	411.7957744	5786.712263	751.5841082	669.6395473	143.0485416	259.3463946
23.06510578	916.0424989	821.2598061	15702.27137	411.9056044	5788.364399	751.7849865	671.1181998	143.1186259	259.4158595
23.13055865	916.3633627	821.4778805	15740.78323	412.041974	5790.405903	752.0342679	672.942377	143.2003681	259.4968794
23.20502769	916.7340829	821.407931	15784.54077	412.1983257	5792.732095	752.319874	675.0162728	143.2863091	259.582061
23.25838688	916.9880085	821.91883	15815.84949	412.3075952	5794.381647	752.5198247	676.5010236	143.360013	259.6551137
23.31174607	917.2447249	822.2712046	15847.12574	412.4174499	5796.032744	752.7207444	677.9849163	143.4301915	259.724672
23.37661956	917.5605171	822.4902333	15885.10733	412.5517802	5798.04213	752.9662946	679.7878593	143.5108556	259.8046233
23.45012546	917.9234178	822.4505784	15928.0851	412.7050545	5800.321836	753.2462906	681.8291805	143.5958552	259.8888717
23.51697668	918.2539442	822.3594998	15967.11707	412.8444699	5802.392555	753.5009335	683.6842205	143.6718407	259.9641858
23.57104804	918.506071	823.0236075	15998.64306	412.953669	5804.045926	753.7008458	685.1833732	143.749278	260.0409389
23.62127146	918.7425286	823.5099114	16027.89573	413.0555682	5805.58275	753.8873096	686.5750473	143.8182953	260.1093463
23.6798885	919.0240138	823.7817901	16062.00207	413.175702	5807.38126	754.1069506	688.1983812	143.892328	260.1827247
23.75100686	919.3691692	823.9003284	16103.32976	413.3222028	5809.564877	754.3746638	690.1665239	143.9774311	260.2670759
23.82337983	919.7267425	823.6718038	16145.32834	413.4726419	5811.791604	754.6493528	692.1678431	144.0563021	260.3452499
23.88317283	920.0109122	824.0192875	16179.97619	413.594266	5813.614433	754.8717601	693.8198744	144.1330388	260.4213085
23.93331787	920.2412888	824.6895738	16208.99819	413.6943846	5815.131282	755.0550812	695.2043512	144.2055722	260.493201
23.98633959	920.4917986	825.0358726	16239.65596	413.8017846	5816.742139	755.2515006	696.667493	144.2743071	260.5613284
24.05179262	920.8048753	825.2477883	16277.45806	413.9351713	5818.733031	755.4953084	698.472514	144.3543664	260.6406804
24.12626166	921.1668294	825.1694291	16320.40905	414.0881534	5821.002117	755.7747305	700.5246166	144.438368	260.7239397
24.17962163	921.4144686	825.676866	16351.14098	414.1950097	5822.610996	755.9702546	701.9937771	144.5107428	260.7956749
24.23298161	921.6649474	826.0250865	16381.84103	414.3024638	5824.221672	756.1667706	703.4620832	144.5795803	260.8639041
24.29785535	921.9732174	826.2381359	16419.12246	414.4338909	5826.182227	756.4069949	705.2460619	144.6585972	260.9422228
24.37136103	922.327678	826.1904492	16461.30769	414.5838969	5828.407027	756.6809945	707.2658886	144.741708	261.0245992
24.43821249	922.6505889	826.0918641	16499.62007	414.7203566	5830.428195	756.9302148	709.1013984	144.8159769	261.0982117
24.49228465	922.8965297	826.7532103	16530.56504	414.8271611	5832.04167	757.1257362	710.584774	144.8921019	261.1736641
24.54250884	923.1272819	827.236399	16559.27858	414.9268467	5833.54165	757.308141	711.9617982	144.9598911	261.2408543
24.60112628	923.4021673	827.5033291	16592.75607	415.0444116	5835.297413	757.523071	713.5680252	145.0324645	261.3127864
24.67224464	923.7393815	827.6149414	16633.32148	415.1878126	5837.42951	757.7850992	715.5154055	145.1157813	261.3953669
24.74461767	924.088959	827.3778603	16674.54544	415.3351195	5839.604218	758.0540431	717.4956055	145.1928069	261.4717118
24.80441134	924.3665188	827.7206666	16708.55446	415.4541574	5841.384304	758.2717086	719.1302099	145.2680756	261.5463154
24.85455713	924.5913467	828.3887464	16737.04136	415.5521073	5842.865457	758.4510547	720.5000804	145.3394182	261.6170276
24.90757935	924.8360476	828.7311171	16767.13375	415.6572285	5844.438787	758.6432966	721.9477745	145.4068614	261.6838749
24.97303256	925.1420088	828.9372392	16804.23847	415.7878164	5846.383623	758.8819731	723.7337193	145.4853091	261.7616293
25.04750164	925.4959446	828.8509077	16846.39699	415.9376342	5848.600679	759.1555932	725.7641218	145.5674516	261.843046
25.10086236	925.7378241	829.3551385	16876.56219	416.0422221	5850.172451	759.3469599	727.2177569	145.6385529	261.913519
25.15422308	925.9825836	829.6994714	16906.69608	416.1474185	5851.746218	759.5393376	728.670542	145.7061046	261.9804738
25.21909709	926.2839509	829.9068806	16943.28962	416.2761134	5853.662141	759.7745538	730.4356388	145.7835412	262.0572261
25.29260259	926.6306589	829.8515661	16984.69622	416.4230414	5855.836696	760.042911	732.4340664	145.8648386	262.1378051
25.35945431	926.9465669	829.7458398	17022.30166	416.5567151	5857.812465	760.2870244	734.2501326	145.9374583	262.2097831
25.41352722	927.1868096	830.4046498	17052.67577	416.6612604	5859.389345	760.4784068	735.7178003	146.0123235	262.2839868
25.46375214	927.4123026	830.8849399	17080.85964	416.7588566	5860.855499	760.6569832	737.0802392	146.0789331	262.3500077
25.52236998	927.6811007	831.1471979	17113.71934	416.8739954	5862.571982	760.8674675	738.6694362	146.1501038	262.4205495
25.59348837	928.0109839	831.2522339	17153.53592	417.0144672	5864.656692	761.1241277	740.5961498	146.2317024	262.5014271
25.66586149	928.3531736	831.0069765	17193.99894	417.1588123	5866.783498	761.387643	742.5553287	146.3069516	262.5760114
25.72565579	928.624617	831.3453678	17227.38039	417.2754024	5868.524178	761.6008239	744.1725863	146.3808076	262.6492147
25.7758023	928.8443043	832.0114232	17255.34164	417.3712983	5869.972392	761.7764082	745.5279176	146.4510044	262.7187912
25.82882501	929.0836212	832.3500881	17284.87863	417.4742605	5871.511067	761.9646949	746.960236	146.517204	262.7844059
25.8942784	929.3829824	832.5507064	17321.29831	417.6021951	5873.413333	762.1985104	748.7271953	146.5940989	262.8606212
25.96874755	929.729475	832.4567555	17362.67844	417.7490114	5875.582247	762.466631	750.7360022	146.6744492	262.9402615
26.02210899	929.9660002	832.9579793	17392.28692	417.8514459	5877.11965	762.6540536	752.1741856	146.7443231	263.0095179
26.07547043	930.2054394	833.2986346	17421.86469	417.9544978	5878.659202	762.8425036	753.6115237	146.810635	263.0752439
26.1403447	930.5003812	833.5006744	17457.78257	418.0805966	5880.533716	763.0729642	755.3578307	146.886547	263.1504851
26.21385007	930.8398671	833.4380593	17498.42441	418.2245981	5882.661611	763.3359602	757.3349655	146.9660939	263.2293291
26.28070205	931.1492451	833.325489	17535.33549	418.3556214	5884.595177	763.5752182	759.1316844	147.0371212	263.2997287
26.33477569	931.3841668	833.9819363	17565.1489	418.4580158	5886.138003	763.7626623	760.5837211	147.1107704	263.3727271
26.3850013	931.604746	834.4594971	17592.81251	418.5536216	5887.572658	763.9375945	761.9316465	147.1762407	263.4376189
26.44361952	931.8678536	834.7173042	17625.06545	418.6664488	5889.252539	764.1438454	763.5038988	147.2460563	263.5068175
26.51473796	932.1908787	834.816047	17664.14657	418.804128	5891.29305	764.395391	765.4100509	147.3259942	263.5860491
26.58711119	932.5261521	834.5629263	17703.86227	418.9456478	5893.375139	764.6537314	767.3483163	147.3995254	263.6589305
26.64690612	932.7918625	834.8971124	17736.62735	419.0599015	5895.078996	764.8626342	768.9483153	147.4720153	263.7307798
26.69705331	933.0067266	835.5612839	17764.07233	419.1538358	5896.496404	765.0346277	770.2891812	147.5411043	263.7992583
26.75007649	933.2409901	835.8964201	17793.06386	419.2547354	5898.00265	765.2191381	771.7062028	147.6061007	263.8636804
26.81553007	933.5341529	836.0917698	17828.81079	419.3801341	5899.865051	765.4483103	773.4542755	147.6814927	263.9384062
26.88999931	933.8736503	835.9904899	17869.42649	419.5240804	5901.988844	765.7111751	775.4416002	147.7601075	264.0163264
26.94336144	934.1051376	836.4888641	17898.48823	419.6244543	5903.494004	765.8948262	776.8644122	147.8287931	264.084405
26.99672357	934.3395684	836.8260105	17927.51984	419.7254538	5905.001438	766.0795187	778.2863839	147.8939044	264.1489409
27.0615981	934.6284581	837.0229015	17962.77419	419.8490666	5906.837056	766.305428	780.0140009	147.9683394	264.2227181
27.13510337	934.961137	836.9532563	18002.66504	419.9902647	5908.921085	766.5632909	781.9699571	148.0461896	264.2998804
27.20195562	935.2643555	836.8340885	18038.89426	420.1187477	5910.814942	766.7978976	783.7474325	148.1156728	264.3687496
27.25602995	935.4942526	837.4883093	18068.15703	420.2190792	5912.325701	766.9815668	785.1839216	148.1881434	264.4405799
27.30625624	935.7101892	837.9632757	18095.30974	420.3127757	5913.730676	767.1530046	786.517411	148.2525094	264.504377
27.36487484	935.9679182	838.2168122	18126.96683	420.4233845	5915.37605	767.355195	788.0728103	148.3210105	264.5722728
27.43599334	936.2844574	838.3094957	18165.32577	420.5583829	5917.374865	767.6018331	789.9585135	148.399337	264.6499072
27.5083667	936.613186	838.048775	18204.30763	420.6971894	5919.414735	767.8552058	791.8759803	148.4712006	264.7211358
27.56816223	936.873466	838.3789269	18236.46747	420.809198	5921.083798	768.0599996	793.4588151	148.5423645	264.7916709
27.61831007	937.0837578	839.0413242	18263.40547	420.9012464	5922.472079	768.2285428	794.7852946	148.6103784	264.8590837
27.67133371	937.3132293	839.3730764	18291.86139	421.0001626	5923.947648	768.4094235	796.1871037	148.6742067	264.922348
27.73678748	937.6005117	839.5633518	18326.94772	421.1231222	5925.772315	768.6341316	797.9163951	148.7481391	264.995627
27.81125683	937.9333691	839.4549874	18366.81283	421.2643069	5927.853372	768.8919413	799.8823581	148.8250677	265.0718759
27.86461963	938.1600697	839.9506388	18395.33771	421.3626971	5929.327969	769.0719628	801.2898841	148.892599	265.1388105
27.91798243	938.38974	840.2844145	18423.83302	421.4617199	5930.804944	769.2530384	802.6965753	148.9565435	265.2021899
27.98285723	938.6728744	840.4763401	18458.43586	421.5829381	5932.603653	769.4745654	804.4056077	149.0295428	265.2745442
28.0563624	938.999077	840.3998935	18497.58935	421.7214348	5934.646033	769.7274841	806.3405064	149.1057434	265.3500714
28.12321492	939.2964316	840.2743377	18533.14906	421.847469	5936.502162	769.9576088	808.0988479	149.173725	265.4174523
28.17728993	939.5215407	840.9264403	18561.87117	421.9458111	5937.982432	770.1376388	809.5198775	149.2450497	265.4881467
28.22751687	939.7330516	841.3989217	18588.52222	422.0376656	5939.359177	770.3057069	810.8390128	149.3083416	265.5508793
28.28613583	939.9856519	841.648338	18619.59428	422.146134	5940.971713	770.5039808	812.3776559	149.375564	265.6175076
28.35725441	940.2960036	841.7351599	18657.24416	422.2785448	5942.930825	770.745884	814.2430285	149.4523226	265.693588
28.4296279	940.6184853	841.4670653	18695.50553	422.4147316	5944.930472	770.994462	816.1398178	149.5225629	265.7632076
28.48942402	940.8735781	841.7933255	18727.0711	422.5245716	5946.566364	771.1952884	817.7055876	149.5924362	265.8324635
28.5395725	941.0794997	842.4540361	18753.51133	422.6147979	5947.926864	771.360499	819.0177638	149.6594037	265.8988393
28.59259658	941.3043899	842.7825245	18781.44137	422.7117973	5949.37316	771.5378731	820.404449	149.7220947	265.9609762
28.65805055	941.5860483	842.96789	18815.87912	422.8323992	5951.161805	771.7582674	822.1150693	149.7946057	266.0328465
28.73252002	941.9125526	842.8526513	18855.00731	422.9709135	5953.20204	772.0111908	824.0597967	149.869892	266.1074675
28.78588346	942.1346698	843.3456843	18883.00507	423.0673849	5954.647428	772.1877025	825.4521264	149.936299	266.1732877
28.83924691	942.3597803	843.6762049	18910.97385	423.1644953	5956.095281	772.3652798	826.8436267	149.9991069	266.2355406
28.90412198	942.6374002	843.8633211	18944.93705	423.2833961	5957.858685	772.5825673	828.5341851	150.0707074	266.3065084
28.97762708	942.957395	843.7802706	18983.36662	423.4192779	5959.861207	772.8307015	830.4481521	150.1453001	266.380442
29.04447987	943.249126	843.6485086	19018.26903	423.542941	5961.68121	773.0564878	832.1874742	150.2118179	266.446372
29.09855554	943.46964	844.2985812	19046.46032	423.639356	5963.132272	773.2329936	833.5931362	150.2820259	266.5159596
29.1487831	943.6769023	844.7686682	19072.61886	423.7294261	5964.481961	773.3977982	834.8980032	150.3442707	266.5776544
29.20740243	943.9245777	845.0140925	19103.11655	423.8358203	5966.063014	773.5922781	836.4199906	150.4102464	266.643047
29.27852108	944.2289858	845.0952234	19140.07032	423.9657233	5967.984048	773.8295935	838.2651559	150.485476	266.7176118
29.35089472	944.5454647	844.8199535	19177.62434	424.0993704	5969.945096	774.0735246	840.141393	150.5541328	266.785662
29.41069141	944.7955699	845.1424433	19208.6065	424.2071074	5971.549142	774.2705046	841.6902011	150.6227473	266.8536702
29.46084051	944.9972874	845.8015381	19234.55804	424.2955661	5972.882958	774.4324833	842.9881606	150.6886943	266.9190344
29.51386503	945.2177695	846.126865	19261.97179	424.390706	5974.301131	774.6064565	844.3598138	150.7502758	266.9800717
29.57931919	945.4940151	846.3074627	19295.77283	424.5090201	5976.055156	774.8226661	846.0518773	150.8214	267.0505674
29.65378878	945.8144028	846.1855345	19334.17757	424.6449428	5978.056141	775.0708484	847.9754999	150.8950832	267.1235996
29.70715285	946.0321047	846.6760368	19361.65785	424.7395513	5979.473431	775.2439536	849.3527261	150.9603931	267.1883323
29.76051693	946.2528213	847.0034012	19389.1097	424.8348047	5980.893261	775.4181349	850.7291286	151.0220916	267.2494857
29.82539226	946.5251262	847.1858437	19422.44496	424.951455	5982.622682	775.6313062	852.401327	151.0923266	267.3191
29.8988973	946.8391358	847.0963636	19460.16387	425.0847969	5984.586822	775.874794	854.2944927	151.1653496	267.3914777
29.96575036	947.125443	846.9585564	19494.42103	425.2061563	5986.372024	776.0963662	856.0149136	151.230438	267.4559909
30.01982667	947.3415224	847.606672	19522.0912	425.3006985	5987.794937	776.269448	857.4053031	151.2995556	267.5244978
30.07005484	947.5446837	848.0744413	19547.76623	425.389034	5989.118544	776.4310811	858.6959901	151.360778	267.5851792
30.12867453	947.7876044	848.3159852	19577.70007	425.493412	5990.669239	776.6218736	860.2014259	151.425536	267.649365
30.19979327	948.0862726	848.3915756	19613.97048	425.6208767	5992.553542	776.8547294	862.0265107	151.4992721	267.7224494
30.27216706	948.3969529	848.1093084	19650.83014	425.7520541	5994.477344	777.0941426	863.8823251	151.5663819	267.7889662
30.33196431	948.6422378	848.4281334	19681.23956	425.8577455	5996.050649	777.2873819	865.4142779	151.6337666	267.8557555
30.38211401	948.8398906	849.0856712	19706.71135	425.9444846	5997.358699	777.446217	866.6981099	151.6987167	267.9201317
30.43513894	949.0561103	849.4079256	19733.61829	426.0378152	5998.749708	777.6168818	868.0548258	151.759214	267.9800944
30.50059331	949.3271208	849.583881	19766.79428	426.1539029	6000.470285	777.8290199	869.7284502	151.8289829	268.0492468
30.57506302	949.6415911	849.4554288	19804.48885	426.2873032	6002.433337	778.0725886	871.6311021	151.9010996	268.1207261
30.62842771	949.8550197	849.9434757	19831.46113	426.3800982	6003.823463	778.2423782	872.9933204	151.9653372	268.1843961
30.6817924	950.071483	850.2677704	19858.40554	426.4735436	6005.216193	778.4132536	874.3547208	152.0259514	268.2444747
30.746668	950.3386416	850.4456596	19891.12439	426.5880024	6006.912745	778.6224173	876.0086766	152.0948515	268.3127659
30.82017299	950.6468548	850.3499066	19928.14569	426.7188706	6008.839749	778.861381	877.8811747	152.1663398	268.3836225
30.88702632	950.9279075	850.2061994	19961.76943	426.8379861	6010.591267	779.078849	879.5828156	152.2300305	268.4467505
30.94110324	951.1396892	850.8524202	19988.92805	426.9307036	6011.986928	779.2485954	880.9580304	152.2980821	268.5142007
30.99133201	951.3388752	851.3179384	20014.12843	427.017349	6013.285278	779.4071387	882.2346282	152.3583049	268.5738913
31.04995204	951.5771862	851.555701	20043.50878	427.1197622	6014.806569	779.5943386	883.723619	152.4218721	268.6368969
31.12107088	951.8702886	851.6258861	20079.1084	427.2448506	6016.655285	779.8228487	885.5287534	152.4941475	268.7085335
31.19344482	952.1753449	851.3367839	20115.28646	427.3736205	6018.542993	780.0578587	887.3642777	152.5597441	268.7735505
31.25324262	952.4159528	851.6520379	20145.13366	427.4773176	6020.086497	780.2474516	888.8794843	152.625926	268.8391476
31.3033929	952.6096607	852.3080684	20170.13452	427.5623799	6021.369562	780.403222	890.14928	152.6899009	268.9025572
31.35641825	952.8217432	852.6273292	20196.54394	427.6539461	6022.734229	780.570661	891.4911557	152.7493377	268.9614688
31.42187281	953.0876715	852.7987553	20229.10638	427.7678626	6024.422362	780.778829	893.1464614	152.8177808	269.0293071
31.49634265	953.3963962	852.66393	20266.10385	427.8988027	6026.34861	781.0178983	895.0282801	152.8883645	269.0992671
31.54970794	953.6056739	853.1495876	20292.57747	427.9898284	6027.712372	781.1844538	896.3755883	152.951553	269.1618972
31.60307323	953.8180051	853.4708898	20319.02375	428.0815098	6029.078797	781.3521043	897.7220847	153.0111063	269.2209242
31.66794908	954.0801637	853.6443345	20351.13752	428.1938304	6030.743436	781.5573584	899.3579177	153.0787001	269.2879207
31.74145403	954.382744	853.5424521	20387.47407	428.3222847	6032.634377	781.7919078	901.2098847	153.1486865	269.3572886
31.80830763	954.6586894	853.3929784	20420.47605	428.4392101	6034.353179	782.0053707	902.8928696	153.2110093	269.4190607
31.86238516	954.8662922	854.0373582	20447.13252	428.5301465	6035.722361	782.1718617	904.2530094	153.2780176	269.4854769
31.9126145	955.0616124	854.5006838	20471.86699	428.6151421	6036.996167	782.3273892	905.5156108	153.3372619	269.5441977
31.97123488	955.2954403	854.734755	20500.70403	428.715637	6038.488881	782.5110821	906.9882655	153.3996637	269.6060481
32.04235382	955.5831287	854.7996586	20535.64521	428.8384052	6040.303005	782.7353497	908.7735823	153.4705091	269.6762675
32.11472791	955.8827134	854.5038715	20571.15421	428.9648244	6042.155619	782.9660606	910.5889516	153.5346243	269.7398162
32.17452624	956.1187701	854.8156394	20600.44954	429.0665737	6043.670141	783.1520928	912.0875232	153.5996286	269.804246
32.2246771	956.3086381	855.4702059	20624.98813	429.1499983	6044.928905	783.3048701	913.343376	153.6626489	269.8667094
32.27770284	956.5166933	855.7865445	20650.9092	429.2398411	6046.267945	783.4691586	914.6705103	153.7210474	269.9245919
32.3431576	956.7776737	855.9535445	20682.8694	429.3516365	6047.924511	783.6734488	916.3076201	153.7881923	269.9911434
32.41762758	957.0808039	855.8124859	20719.18261	429.4801731	6049.814943	783.908123	918.1687455	153.857275	270.0596157
32.47099345	957.2860388	856.2958135	20745.16674	429.5694701	6051.153044	784.0715187	919.5012434	153.9194362	270.1212276
32.52435932	957.4943451	856.6141933	20771.12407	429.6594278	6052.493862	784.2360183	920.8329355	153.9779504	270.1792248
32.58923544	957.7516326	856.7832934	20802.64392	429.7696588	6054.127429	784.4374521	922.4507679	154.0442651	270.2449534
32.66274035	958.0487248	856.6754149	20838.30834	429.8957541	6055.983253	784.6676879	924.2823427	154.1127804	270.3128633
32.72959421	958.3196932	856.5202988	20870.70002	430.010539	6057.670189	784.8772367	925.9467977	154.1737634	270.3733074
32.78367234	958.5232228	857.1628852	20896.86359	430.0997343	6059.013576	785.0405459	927.2919642	154.2397499	270.4387108
32.83390224	958.7147745	857.6240714	20921.14072	430.183117	6060.263471	785.1931254	928.5406637	154.2980359	270.4964818
32.89252295	958.9442317	857.8545338	20949.44447	430.2817366	6061.728339	785.37339	929.9970931	154.359296	270.5572006
32.96364199	959.2266415	857.9142708	20983.73936	430.4022363	6063.508752	785.5935101	931.7627272	154.4287408	270.6260317
33.03601623	959.5208907	857.6119395	21018.59165	430.526357	6065.32716	785.8200179	933.558079	154.4914047	270.6881418
33.09581509	959.7525081	857.9202994	21047.34528	430.6262017	6066.813429	786.0025685	935.0401287	154.5552553	270.7514282
33.1459665	959.9386303	858.5734398	21071.43011	430.7080246	6068.048499	786.1524189	936.2821334	154.6173405	270.8129648
33.19899264	960.1427566	858.8869219	21096.87183	430.7961818	6069.36255	786.3136263	937.5946271	154.6747218	270.869839
33.26444759	960.3989097	859.049592	21128.2409	430.9059028	6070.988331	786.5141241	939.2136655	154.7405947	270.9351298
33.3389177	960.6965809	858.9024312	21163.88248	431.0320884	6072.843831	786.7444996	941.0542398	154.8082066	271.0021443
33.39228415	960.8978702	859.3834826	21189.38615	431.1196943	6074.156899	786.9048046	942.3720287	154.8693613	271.0627586
33.44565059	961.102248	859.6990048	21214.86353	431.2079658	6075.472733	787.0662219	943.6890179	154.9268575	271.1197467
33.51052696	961.3547808	859.8638536	21245.80042	431.3161525	6077.075984	787.2639187	945.2889737	154.9919186	271.1842329
33.58403185	961.6465153	859.7501041	21280.80512	431.4399397	6078.897539	787.4899344	947.1002974	155.0589925	271.2507141
33.65088596	961.9126245	859.5894626	21312.59777	431.5526302	6080.553374	787.6956536	948.7463506	155.1186624	271.3098567
33.70496467	962.1121764	860.2302987	21338.27752	431.6401218	6081.871584	787.8558493	950.0766469	155.1836476	271.3742677
33.75519512	962.3000476	860.6893938	21362.10575	431.721926	6083.098135	788.0055441	951.3115403	155.2409945	271.4311078
33.81381617	962.5252363	860.9163245	21389.88605	431.8187103	6084.535818	788.1824539	952.7518568	155.3011357	271.4907176
33.8849353	962.8024901	860.9710029	21423.54658	431.9369899	6086.283316	788.3985153	954.4979452	155.3692076	271.558188
33.9573097	963.0915273	860.6622608	21457.75429	432.058861	6088.068321	788.6209095	956.2734188	155.4304491	271.6188883
34.01710907	963.3188077	860.9672855	21485.97622	432.1568413	6089.526996	788.8000523	957.7390615	155.4931689	271.6810539
34.06726103	963.5012697	861.6190343	21509.61566	432.2370963	6090.738923	788.9470377	958.9673143	155.5543375	271.741682
34.12028755	963.7015568	861.929721	21534.58688	432.3236035	6092.028565	789.1052293	960.2652693	155.6107217	271.7975679
34.18574269	963.9529924	862.0881513	21565.37574	432.4312937	6093.624272	789.3020146	961.8663629	155.6753479	271.861623
34.26021294	964.2453284	861.9350127	21600.35809	432.5551776	6095.445643	789.5281819	963.68653	155.7415181	271.9272085
34.31357994	964.4427611	862.4138378	21625.39016	432.6411278	6096.73425	789.685461	964.9897127	155.8016862	271.9868449
34.36694695	964.6432986	862.7265629	21650.39646	432.7277482	6098.02567	789.8438605	966.2921018	155.8581843	272.0428438
34.43182357	964.8911832	862.8872482	21680.76115	432.8339332	6099.599293	790.0378982	967.8743066	155.9220166	272.106112
34.50532843	965.1776798	862.7677466	21715.11833	432.9554604	6101.387354	790.2597818	969.665522	155.9876773	272.1711925
34.5721828	965.4390379	862.601691	21746.323	433.0660998	6103.01279	790.4617511	971.293303	156.0460599	272.2290592
34.62626207	965.6347	863.2408162	21771.52787	433.1519228	6104.306386	790.6188978	972.6088338	156.1100635	272.2924972
34.67649306	965.818972	863.6978654	21794.91549	433.2321811	6105.510115	790.7657675	973.8300183	156.1664896	272.3484247
34.73511444	966.0399859	863.9213372	21822.182	433.327168	6106.921218	790.9393918	975.2543357	156.2255338	272.4069472
34.80623367	966.3121969	863.9710594	21855.2199	433.4432731	6108.636531	791.151478	976.9810169	156.2922598	272.4730835
34.87860822	966.5961361	863.6560338	21888.79494	433.5629408	6110.388872	791.3698433	978.7367535	156.3521065	272.5324014
34.9384081	966.8191738	863.9577922	21916.49498	433.6590949	6111.820562	791.5456482	980.1861053	156.4137176	272.5934681
34.98856058	966.9980549	864.6081808	21939.69726	433.737814	6113.009853	791.6898272	981.4007035	156.4739875	272.6532054
35.04158748	967.1945858	864.9161298	21964.20666	433.8227048	6114.275619	791.8450645	982.6842231	156.5293941	272.7081223
35.10704282	967.4414057	865.0704062	21994.42603	433.9284055	6115.841909	792.0382132	984.2674997	156.5927977	272.7709657
35.18151321	967.7285215	864.9114083	22028.76135	434.0500345	6117.629893	792.2602581	986.0674054	156.6575542	272.83515
35.23488075	967.92218	865.3880539	22053.33053	434.1343625	6118.894569	792.4145726	987.3560858	156.7167547	272.8938274
35.2882483	968.1189592	865.6980391	22077.87444	434.2193652	6120.162102	792.5700155	988.6439789	156.7722742	272.9488562
35.35312516	968.3622948	865.8546446	22107.67751	434.323589	6121.706735	792.7604681	990.2085597	156.8349014	273.0109301
35.42663001	968.6436648	865.7295046	22141.39913	434.4429017	6123.462022	792.9783033	991.9798112	156.8991763	273.0746369
35.49348463	968.9003724	865.5581416	22172.02671	434.5515314	6125.057708	793.1765982	993.5894512	156.9562965	273.1312524
35.54756446	969.0922268	866.1955925	22196.76546	434.6357193	6126.327214	793.3307573	994.8903221	157.0193374	273.1937362
35.59779597	969.2729752	866.6506383	22219.7206	434.7144628	6127.508606	793.4748586	996.097896	157.0748605	273.2487687
35.65641767	969.4899021	866.8707205	22246.48283	434.8076882	6128.893693	793.6452634	997.5063293	157.1328289	273.3062248
35.72753701	969.757176	866.9155844	22278.9096	434.9216623	6130.577503	793.8534542	999.2137434	157.1982348	273.3710528
35.79991171	970.0361239	866.5943979	22311.86367	435.0391705	6132.297869	794.0678712	1000.949885	157.2567136	273.4290148
35.85971208	970.2550072	866.8929554	22339.05147	435.1335348	6133.703139	794.2404048	1002.383064	157.3172373	273.4890037
35.90986508	970.4303817	867.542013	22361.82466	435.2107485	6134.870269	794.3818333	1003.584106	157.3766258	273.5478674
35.96289235	970.6232342	867.8472793	22385.88078	435.2940551	6136.112659	794.5341752	1004.853295	157.4310734	273.6018339
36.02834787	970.8655341	867.9974837	22415.54119	435.3978058	6137.650146	794.7237595	1006.418883	157.493278	273.6634888
36.1028184	971.1475373	867.8327407	22449.24144	435.5172247	6139.405437	794.9417638	1008.198675	157.5566478	273.7262987
36.15618648	971.3374992	868.3072512	22473.35628	435.5999626	6140.646678	795.0931726	1009.472958	157.6148994	273.7840355
36.20955456	971.5305974	868.614551	22497.44635	435.6833795	6141.890818	795.2457172	1010.74646	157.6694589	273.8381129
36.27443167	971.7694771	868.7671568	22526.69818	435.7856808	6143.40706	795.4326558	1012.293545	157.7309041	273.8990152
36.3479365	972.0458255	868.6364881	22559.79602	435.9028227	6145.130249	795.6465225	1014.044979	157.7938196	273.9613747
36.41479137	972.2979775	868.4599202	22589.85716	436.0094822	6146.696796	795.8412155	1015.63661	157.8497015	274.0167628
36.46887174	972.4861015	869.0957316	22614.13841	436.0920672	6147.942706	795.9924457	1016.922928	157.9117981	274.0783106
36.51910377	972.6633979	869.5488142	22636.66906	436.1693255	6149.102217	796.1338331	1018.11699	157.9664354	274.1324651
36.57772577	972.8763206	869.7655732	22662.93633	436.260824	6150.46182	796.3010815	1019.509656	158.0233485	274.1888753
36.64884522	973.1387573	869.8056733	22694.76329	436.372709	6152.114768	796.5054533	1021.197944	158.0874595	274.2524198
36.72122007	973.4128147	869.4784443	22727.10787	436.4880999	6153.803809	796.7159994	1022.914636	158.1445963	274.3090518
36.78102092	973.6276272	869.7738635	22753.7929	436.5807093	6155.183195	796.8853257	1024.331759	158.2040534	274.3679834
36.83117443	973.7995656	870.4216178	22776.14493	436.6564471	6156.328612	797.0240574	1025.519344	158.2625772	274.42599
36.88420207	973.9888135	870.7242539	22799.75616	436.7382003	6157.548097	797.1735603	1026.774307	158.3160841	274.4790242
36.94965777	974.2266838	870.8704654	22828.86794	436.840039	6159.057361	797.3596499	1028.322338	158.3771124	274.5395132
37.02412844	974.5036768	870.7000876	22861.94487	436.9572907	6160.780617	797.5736923	1030.082164	158.4391219	274.6009747
37.07749704	974.6900158	871.1725052	22885.61377	437.0384693	6161.998894	797.7222518	1031.342156	158.4964425	274.6577888
37.13086564	974.8795061	871.4771722	22909.25838	437.1203313	6163.220109	797.8719546	1032.601373	158.5500603	274.7109328
37.19574299	975.1140186	871.6258556	22937.96918	437.2207474	6164.708528	798.0554473	1034.131092	158.610346	274.7706857
37.26924782	975.3854451	871.4897639	22970.45477	437.3357605	6166.400258	798.2654225	1035.862855	158.6719278	274.8317234
37.33610293	975.6331318	871.3080907	22999.95996	437.440488	6167.938248	798.4565835	1037.436611	158.7265948	274.8859073
37.39018383	975.8175991	871.9422954	23023.79217	437.521501	6169.16103	798.6049414	1038.708483	158.7877649	274.9465369
37.44041636	975.9915115	872.3934535	23045.90618	437.5973028	6170.299095	798.7436672	1039.889134	158.8415332	274.9998301
37.49903867	976.200509	872.6069534	23071.68763	437.6871078	6171.633718	798.9078203	1041.266149	158.8974109	275.055214
37.57015822	976.4582039	872.642381	23102.92587	437.7969438	6173.256415	799.1084469	1042.935454	158.9602515	275.1174993
37.64253323	976.7274669	872.3092241	23134.67225	437.9102584	6174.91475	799.3151967	1044.63284	159.0160718	275.1728263
37.70233455	976.9382884	872.6015657	23160.8638	438.0011467	6176.268762	799.4813774	1046.034028	159.0744822	275.2307206
37.75248855	977.1068578	873.2480428	23182.80246	438.0754367	6177.392892	799.6174642	1047.208257	159.1321577	275.2878864
37.80551654	977.2925717	873.5480996	23205.97702	438.1556664	6178.589923	799.7641828	1048.4491	159.1847417	275.3400058
37.87097243	977.526099	873.6903945	23234.55033	438.2556298	6180.071518	799.9468447	1049.979705	159.2446159	275.3993509
37.94544323	977.7981796	873.5144889	23267.01548	438.370756	6181.763367	800.1570013	1051.719715	159.3052907	275.4594895
37.99881234	977.9809662	873.9848544	23290.24668	438.4504052	6182.959128	800.3027661	1052.965523	159.3616978	275.5153982
38.05218146	978.1669187	874.2869391	23313.45407	438.5307419	6184.157866	800.4496815	1054.210562	159.4143916	275.5676263
38.11705904	978.3971489	874.4317749	23341.63384	438.6293089	6185.619004	800.6297944	1055.723045	159.4735395	275.6262516
38.19056386	978.6637491	874.2903631	23373.51852	438.742234	6187.279891	800.8359526	1057.435284	159.5338128	275.6859923
38.25741922	978.9070571	874.1036812	23402.47804	438.8450664	6188.789878	801.0236491	1058.9913	159.5872877	275.7389946
38.31150063	979.0879383	874.7363107	23425.86951	438.9245374	6189.989981	801.1691896	1060.248836	159.6475488	275.7987232
38.36173365	979.2585321	875.1855815	23447.57458	438.9989105	6191.107015	801.3053047	1061.416176	159.7004644	275.8511713
38.42035627	979.4636802	875.3958845	23472.87921	439.0870542	6192.417142	801.4664214	1062.777658	159.7553262	275.9055483
38.49147592	979.7167246	875.4267281	23503.53964	439.1948803	6194.010174	801.6633742	1064.428124	159.8169202	275.966598
38.56385108	979.9812857	875.0877552	23534.69889	439.306158	6195.638396	801.8664001	1066.10635	159.8714486	276.0206446
38.62365286	980.1881929	875.3770777	23560.40608	439.3953579	6196.967523	802.0294952	1067.491723	159.9288321	276.077521
38.67380736	980.353458	876.0223026	23581.93901	439.4682278	6198.070777	802.1629873	1068.652697	159.9856752	276.1338617
38.72683569	980.5357057	876.3198292	23604.68498	439.5469629	6199.245786	802.3069744	1069.879527	160.0373535	276.1850834
38.79229177	980.7649733	876.4582818	23632.72979	439.6450867	6200.700245	802.4862739	1071.392838	160.0960952	276.2433061
38.8667627	981.0322356	876.2769527	23664.59448	439.7581277	6202.36129	802.6926186	1073.113183	160.1554603	276.3021466
38.92013231	981.2115377	876.7453053	23687.39607	439.8362765	6203.534967	802.8356417	1074.344913	160.2109712	276.3571669
38.97350192	981.3940201	877.0448568	23710.17434	439.9151169	6204.711658	802.9798225	1075.575882	160.2627582	276.4084963
39.03837975	981.6200498	877.1859177	23737.8329	440.0118697	6206.146038	803.1566197	1077.071261	160.3207896	276.4660149
39.11188456	981.8819158	877.0392859	23769.12779	440.1227464	6207.77667	803.3590332	1078.764127	160.3797789	276.5244829
39.17874015	982.1209284	876.8476894	23797.55175	440.2237196	6209.25919	803.5433308	1080.302537	160.432084	276.5763259
39.23282208	982.2982918	877.4787741	23820.51063	440.3016777	6210.437047	803.6861071	1081.545845	160.4914531	276.6351703
39.28305558	982.4656301	877.9261936	23841.81433	440.374649	6211.533451	803.8196608	1082.699976	160.543532	276.686789
39.34167849	982.6670018	878.13336	23866.65096	440.4611628	6212.819548	803.9777987	1084.046045	160.5973968	276.7401779
39.41279824	982.9154843	878.1597059	23896.74427	440.5670171	6214.38348	804.1711471	1085.677815	160.6577676	276.8000152
39.48517356	983.1754325	877.8150258	23927.32724	440.6762964	6215.982161	804.3705195	1087.337029	160.7110283	276.8528052
39.54497579	983.3784997	878.1013862	23952.55905	440.7638397	6217.286876	804.5305871	1088.706709	160.767404	276.9086827
39.59513076	983.540523	878.7453832	23973.69375	440.8353162	6218.369649	804.6615334	1089.854528	160.8234301	276.9642138
39.64815943	983.71937	879.0404274	23996.01906	440.9125848	6219.523054	804.8028406	1091.067453	160.8742198	277.0145547
39.71361569	983.9444585	879.1751099	24023.54515	441.0089036	6220.95089	804.978841	1092.563604	160.9318502	277.0716758
39.78808676	984.2069935	878.9884587	24054.82049	441.1198986	6222.581715	805.1814456	1094.264434	160.98993	277.1292424
39.84145686	984.3828768	879.4548366	24077.20043	441.1965753	6223.733725	805.3217786	1095.482196	161.0445612	277.1833909
39.89482696	984.5619545	879.7519026	24099.55749	441.2739475	6224.888786	805.4632763	1096.699203	161.0954584	277.2338383
39.95970501	984.7838628	879.8892596	24126.70451	441.3689203	6226.296913	805.63682	1098.177609	161.1523942	277.290271
40.03320983	985.0410838	879.7375054	24157.42053	441.4777871	6227.897862	805.8355594	1099.851251	161.2101234	277.34749
40.10006565	985.275882	879.541086	24185.31884	441.5769359	6229.353431	806.0165219	1101.372193	161.2612806	277.3981952
40.15414807	985.4497937	880.1706554	24207.85313	441.6534096	6230.509461	806.1565861	1102.601383	161.3197743	277.456172
40.20438204	985.6139375	880.6162586	24228.76287	441.7250054	6231.585623	806.2876264	1103.742408	161.371032	277.5069767
40.26300525	985.8116039	880.8203472	24253.14016	441.8099199	6232.848143	806.4428413	1105.073182	161.4239185	277.5593959
40.33412511	986.0556099	880.8422794	24282.67685	441.9138393	6234.383521	806.632653	1106.686402	161.4830888	277.6180433
40.40650057	986.3110319	880.4919986	24312.69423	442.0211577	6235.953217	806.8284404	1108.326751	161.5351053	277.6696002
40.46630324	986.5103308	880.7754525	24337.45944	442.1070755	6237.233977	806.9855372	1109.680859	161.590492	277.7244974
40.51645868	986.6691731	881.4182449	24358.20329	442.1771846	6238.296653	807.1139855	1110.815626	161.6457165	277.7792339
40.56948769	986.844683	881.7108533	24380.11571	442.2530142	6239.428858	807.252663	1112.014755	161.6956339	277.8287103
40.63494412	987.0656705	881.8418361	24407.13268	442.3475618	6240.830571	807.4254261	1113.493879	161.7521737	277.8847504
40.70941533	987.3235667	881.6499621	24437.82959	442.4565493	6242.431741	807.6243606	1115.175348	161.8089922	277.9410669
40.76278591	987.4960951	882.1144024	24459.79567	442.5317812	6243.562489	807.7620538	1116.379251	161.8627602	277.9943597
40.81615648	987.6718316	882.4090294	24481.73933	442.6077127	6244.696324	807.9009185	1117.582404	161.912784	278.0439415
40.88103476	987.8896955	882.5427516	24508.38426	442.7009388	6246.078689	808.0712698	1119.04397	161.9686446	278.0993085
40.95453958	988.1423582	882.3859705	24538.53213	442.8078333	6247.650508	808.2664037	1120.69854	162.0251372	278.1553018
41.02139564	988.3730205	882.1848181	24565.91452	442.9051919	6249.079631	808.4440936	1122.20215	162.0751677	278.2048903
41.07547854	988.5435446	882.8129006	24588.03207	442.9802088	6250.214239	808.5814961	1123.417333	162.1328023	278.2620156
41.12571297	988.7045535	883.2567215	24608.55515	443.0504548	6251.270536	808.71007	1124.545353	162.1832541	278.3120215
41.18433646	988.8985835	883.4577898	24632.48161	443.1337998	6252.509918	808.8624165	1125.860953	162.2351804	278.363489
41.25545642	989.1381963	883.4753906	24661.47198	443.2358204	6254.017275	809.0487576	1127.455769	162.2931725	278.4209687
41.32783203	989.3891763	883.1196131	24690.93423	443.3412145	6255.558524	809.2410269	1129.077403	162.343968	278.4713153
41.38763514	989.5847771	883.4002147	24715.24148	443.425537	6256.815775	809.3952083	1130.416061	162.3983841	278.5252505
41.43779103	989.7404972	884.0418252	24735.60169	443.4943044	6257.858727	809.5212051	1131.537879	162.4528217	278.5792071
41.49082037	989.9127321	884.3320431	24757.10888	443.5687218	6258.970127	809.6573019	1132.723319	162.5018832	278.6278351
41.55627698	990.1296948	884.4593952	24783.62616	443.6615312	6260.3462	809.8268881	1134.185551	162.5573526	278.6828143
41.63074832	990.3830383	884.2623953	24813.75534	443.7685485	6261.918267	810.022221	1135.847813	162.6129332	278.7379037
41.68411936	990.5522739	884.7249343	24835.31522	443.8423627	6263.028146	810.1573235	1137.037965	162.6658539	278.7903568
41.73749041	990.7247311	885.0171677	24856.85312	443.9168801	6264.141149	810.2936043	1138.227374	162.7150207	278.8390892
41.80236891	990.9386254	885.1473226	24883.00526	444.0083921	6265.498229	810.4608225	1139.672235	162.7698259	278.8934101
41.87587373	991.1868143	884.985608	24912.59551	444.113351	6267.041459	810.6524182	1141.307883	162.8251048	278.9482005
41.94273002	991.4134172	884.7798104	24939.47152	444.2089527	6268.444625	810.8268962	1142.794299	162.8740297	278.996693
41.9968134	991.5806166	885.4064339	24961.18005	444.2825399	6269.558209	810.9616866	1143.995586	162.930821	279.0529826
42.04704828	991.7385484	885.8485057	24981.32361	444.3514612	6270.595008	811.0878401	1145.110705	162.9804819	279.1022046
42.10567205	991.9290092	886.0466098	25004.80758	444.4332659	6271.811679	811.2373714	1146.411251	163.0314658	279.1527379
42.17679211	992.1643102	886.0599596	25033.26175	444.5334231	6273.291532	811.4203065	1147.98781	163.0883016	279.2090716
42.24916787	992.4109303	885.6987873	25062.17915	444.6369286	6274.804861	811.6091231	1149.590877	163.1378988	279.2582304
42.30897141	992.6029011	885.9765896	25086.03691	444.7196856	6276.039037	811.7604434	1150.914209	163.1913621	279.3112214
42.35912774	992.7555568	886.6170403	25106.02059	444.787136	6277.06263	811.8840342	1152.023181	163.2450276	279.3644126
42.4121574	992.924577	886.9049122	25127.13004	444.8601675	6278.153607	812.0175983	1153.195043	163.2932489	279.4122079
42.47761418	993.1375892	887.028701	25153.15688	444.951271	6279.504516	812.1840666	1154.640517	163.3476677	279.4661458
42.55208566	993.3864639	886.8266702	25182.72884	445.0563546	6281.048015	812.3758647	1156.283724	163.4020334	279.520031
42.60545716	993.5524674	887.2873431	25203.89004	445.1287774	6282.137412	812.5084248	1157.460236	163.4541225	279.5716599
42.65882867	993.7217057	887.5772274	25225.02969	445.2019072	6283.229966	812.6421695	1158.636012	163.5024481	279.6195584
42.72370739	993.9317037	887.7038813	25250.69816	445.2917367	6284.562227	812.8063129	1160.0643	163.5562176	279.6728528
42.79721221	994.1755013	887.5373245	25279.74111	445.394796	6286.077395	812.994436	1161.681179	163.6103053	279.7264626
42.86406872	994.3981196	887.3269676	25306.12012	445.4886734	6287.455081	813.1657619	1163.150539	163.6581449	279.7738794
42.91815257	994.5620553	887.9521593	25327.42719	445.5608574	6288.548027	813.2979886	1164.338041	163.7141087	279.8293487
42.96838789	994.7169667	888.3925146	25347.19826	445.6284786	6289.565687	813.4217664	1165.440363	163.7629932	279.8778012
43.02701193	994.903924	888.5877094	25370.24792	445.7087716	6290.760066	813.5685349	1166.725977	163.8130522	279.9274178
43.0981321	995.1349925	888.5968869	25398.17582	445.8070999	6292.212922	813.7481271	1168.284426	163.8687532	279.9826266
43.170508	995.3773328	888.2304197	25426.55847	445.9087519	6293.698844	813.9335551	1169.869076	163.9171741	280.0306197
43.23031196	995.5657405	888.5054745	25449.97505	445.9899723	6294.910368	814.0820673	1171.177206	163.9697025	280.0826838
43.28046873	995.715388	889.1447869	25469.58916	446.0561302	6295.914957	814.2032967	1172.273435	164.02261	280.1351238
43.3334987	995.8812526	889.4303563	25490.30823	446.1278014	6296.985888	814.3343749	1173.431827	164.0700068	280.1821018
43.39895566	996.0903869	889.5506477	25515.85371	446.2172306	6298.312094	814.4977831	1174.860681	164.1233945	280.2350177
43.47342726	996.3348749	889.3436792	25544.87878	446.3204165	6299.827551	814.6861121	1176.484988	164.1765677	280.287721
43.52679922	996.4977057	889.8025206	25565.64866	446.3914735	6300.89684	814.8161766	1177.64797	164.2278407	280.338541
43.58017117	996.6637842	890.0900993	25586.39742	446.4632413	6301.96932	814.9474324	1178.810222	164.2753406	280.3856212
43.64505011	996.8699574	890.2133168	25611.59118	446.5514196	6303.277218	815.1085577	1180.222073	164.3280935	280.4379079
43.71855494	997.1094442	890.0420074	25640.09696	446.6526144	6304.764839	815.2932726	1181.820335	164.3810121	280.4903589
43.78541167	997.3281511	889.8271756	25665.98818	446.7447994	6306.117513	815.4615048	1183.272778	164.4277865	280.53672
43.83949597	997.488883	890.4509619	25686.90121	446.8156062	6307.1902	815.5912153	1184.446607	164.482938	280.5913841
43.88973172	997.6408294	890.8896324	25706.30669	446.8819513	6308.189072	815.7126613	1185.536236	164.5310606	280.6390814
43.94835604	997.8243474	891.0819718	25728.93008	446.9607606	6309.361566	815.8567182	1186.807038	164.5802117	280.6877983
44.01947631	998.051261	891.0870542	25756.34146	447.0572939	6310.78792	816.0330293	1188.347526	164.6347988	280.741903
44.09185235	998.2894	890.7153898	25784.19924	447.1571266	6312.246937	816.2151315	1189.91391	164.6820654	280.7887519
44.15165672	998.4743098	890.9877479	25807.18282	447.2368388	6313.436226	816.3608874	1191.206961	164.733676	280.8399064
44.20181392	998.6210043	891.6259433	25826.4342	447.3017281	6314.422159	816.4797991	1192.290551	164.7858396	280.8916091
44.2548442	998.7837711	891.9092527	25846.77011	447.3720642	6315.473409	816.6084375	1193.435585	164.832427	280.9377849
44.32030132	998.9890985	892.0261113	25871.84313	447.4598502	6316.775365	816.7688422	1194.847953	164.8848027	280.9896977
44.39477306	999.2292802	891.8142962	25900.33143	447.5611733	6318.263293	816.9537662	1196.453515	164.9368055	281.0412409
44.44814545	999.3889963	892.2713401	25920.71724	447.6308899	6319.312842	817.0813814	1197.603077	164.9872774	281.0912669
44.50151785	999.5519728	892.5566557	25941.08235	447.7013208	6320.365616	817.2101941	1198.751917	165.0339669	281.1375438
44.566397	999.7543913	892.6765004	25965.81018	447.7878785	6321.649596	817.3683573	1200.147465	165.0857221	281.1888417
44.63990184	999.9896463	892.5005261	25993.78875	447.8872434	6323.110174	817.549727	1201.727264	165.1374931	281.2401552
44.70675878	1000.204513	892.281302	26019.2012	447.9777672	6324.438294	817.7149226	1203.162928	165.1832221	281.2854801
44.76084353	1000.3621	892.9037091	26039.72749	448.0472223	6325.491092	817.8421633	1204.323198	165.2375763	281.339354
44.81107971	1000.511136	893.3407259	26058.77413	448.1123148	6326.471518	817.9613207	1205.400237	165.284951	281.38631
44.86970429	1000.691277	893.5302625	26080.97915	448.1896677	6327.622529	818.102716	1206.656351	165.3332111	281.4341437
44.94082466	1000.914112	893.5313254	26107.88356	448.2844392	6329.022865	818.2758068	1208.179024	165.3867049	281.4871648
45.01320085	1001.148127	893.1545598	26135.2262	448.3824864	6330.45547	818.4546446	1209.727293	165.4328384	281.5328906
45.07300561	1001.329602	893.424271	26157.78478	448.4607183	6331.622928	818.5976952	1211.00539	165.4835482	281.5831523
45.12316323	1001.473398	894.0613698	26176.68014	448.5243623	6332.590546	818.714332	1212.076446	165.5349817	281.6341313
45.17619381	1001.633123	894.342461	26196.63999	448.593388	6333.622476	818.8405755	1213.20823	165.5807747	281.6795197
45.2416511	1001.834713	894.4559502	26221.24931	448.679561	6334.900624	818.9980323	1214.60425	165.6321571	281.7304481
45.31612297	1002.070668	894.239378	26249.21078	448.7790559	6336.361526	819.1796141	1216.191222	165.6830111	281.7808526
45.36949579	1002.227326	894.6946575	26269.21962	448.8474568	6337.391696	819.3048252	1217.327476	165.7326967	281.8300992
45.42286862	1002.387257	894.9777517	26289.20817	448.9165755	6338.425123	819.4312399	1218.463014	165.7785909	281.8755878
45.48774798	1002.585989	895.0942859	26313.4787	449.0015424	6339.685622	819.5864958	1219.842395	165.8293667	281.9259149
45.56125283	1002.81709	894.9137329	26340.93982	449.0991111	6341.119651	819.7645821	1221.403885	165.8800114	281.9761122
45.62810999	1003.028187	894.6901975	26365.88236	449.1880045	6342.423665	819.9267972	1222.82291	165.9247142	282.02042
45.68219517	1003.182686	895.3112506	26386.02906	449.2561327	6343.456936	820.0516137	1223.969731	165.9782859	282.0735183
45.73243176	1003.328864	895.7466443	26404.7235	449.3199959	6344.419254	820.1685247	1225.034286	166.0249265	282.1197467
45.79105661	1003.505691	895.9334299	26426.51789	449.3959193	6345.549173	820.3073075	1226.275833	166.072312	282.1667135
45.86217708	1003.724521	895.9305475	26452.92472	449.4889615	6346.923966	820.4772375	1227.780842	166.1247328	282.218671
45.93455345	1003.954487	895.5487712	26479.76178	449.5852561	6348.330641	820.6528712	1229.311147	166.1697541	282.2632945
45.9943586	1004.132591	895.8158853	26501.90322	449.662035	6349.476667	820.7932665	1230.574414	166.2195797	282.3126799
46.04451659	1004.27354	896.4519104	26520.44914	449.7244567	6350.426302	820.9076701	1231.63304	166.2702965	282.3629485
46.09754744	1004.43028	896.7308245	26540.03987	449.7921961	6351.439264	821.031563	1232.751685	166.3153099	282.4075641
46.1630049	1004.628201	896.8410065	26564.19407	449.876786	6352.694038	821.1861262	1234.131493	166.3657173	282.4575261
46.23747694	1004.860005	896.6197637	26591.63848	449.9744864	6354.128408	821.3644277	1235.700033	166.4154437	282.5068131
46.29085017	1005.013661	897.0733122	26611.27732	450.0415958	6355.139552	821.487279	1236.823089	166.4643576	282.5552947
46.3442234	1005.170603	897.3542263	26630.89628	450.1094265	6356.153984	821.6113399	1237.945436	166.509471	282.6000095
46.40910297	1005.365716	897.4675109	26654.71797	450.192832	6357.391431	821.763742	1239.308786	166.5592856	282.6493839
46.48260787	1005.592738	897.2824626	26681.67123	450.2886377	6358.799396	821.9386057	1240.85212	166.6088248	282.6984854
46.54946525	1005.800134	897.0546935	26706.15257	450.3759308	6360.079743	822.0978952	1242.254647	166.6525204	282.7417949
46.60355085	1005.951602	897.6744199	26725.9267	450.4427566	6361.093843	822.2203323	1243.388133	166.705324	282.7941319
46.65378782	1006.094974	898.1082209	26744.27545	450.505413	6362.038382	822.3350382	1244.440307	166.7512441	282.8396461
46.71241291	1006.268547	898.2923062	26765.66681	450.5799334	6363.147593	822.4712567	1245.667411	166.7977712	282.8857621
46.78353351	1006.483446	898.2855511	26791.58528	450.6712781	6364.497308	822.6380841	1247.154903	166.8491387	282.9366757
46.85591011	1006.709436	897.8988535	26817.92612	450.7658526	6365.878527	822.8105731	1248.667398	166.8930683	282.9802171
46.91571563	1006.884231	898.163419	26839.65815	450.8412052	6367.003511	822.9483619	1249.91596	166.9420262	283.0287424
46.96587395	1007.022385	898.7983925	26857.86106	450.9024271	6367.93549	823.0605735	1250.962259	166.9920396	283.0783138
47.01890503	1007.176194	899.0751698	26877.0895	450.9689038	6368.929828	823.1821589	1252.067876	167.0362876	283.1221708
47.08436267	1007.370513	899.1821056	26900.79701	451.0519397	6370.161655	823.333882	1253.431609	167.0857381	283.1711843
47.15883492	1007.598242	898.9562773	26927.73395	451.1478789	6371.569978	823.5089638	1254.981873	167.1343578	283.2193744
47.21220853	1007.748951	899.4081276	26947.00963	451.2137205	6372.56244	823.6294986	1256.091843	167.1825142	283.2671052
47.26558213	1007.902957	899.6869016	26966.26582	451.2802869	6373.558223	823.7512492	1257.201111	167.2268612	283.3110604
47.33046192	1008.094517	899.7969965	26989.64699	451.3621599	6374.773037	823.9008501	1258.548565	167.2757323	283.3594996
47.4039669	1008.317535	899.607535	27016.10181	451.4562352	6376.155413	824.0725506	1260.073899	167.3241865	283.4075257
47.47082451	1008.521298	899.3756088	27040.13049	451.5419575	6377.412525	824.2289687	1261.460067	167.3668934	283.4498552
47.5249105	1008.669789	899.9940345	27059.53894	451.6075049	6378.407802	824.34907	1262.580331	167.4189432	283.501445
47.57514782	1008.810406	900.4262727	27077.54838	451.6689766	6379.334885	824.4616114	1263.620229	167.464156	283.5462583
47.63377315	1008.980784	900.6077075	27098.54416	451.7421198	6380.423766	824.5953128	1264.833012	167.5098405	283.5915392
47.70489388	1009.191824	900.5971509	27123.98332	451.8317985	6381.748861	824.759095	1266.303138	167.5601742	283.6414281
47.77727073	1009.413912	900.2056212	27149.83715	451.9246845	6383.105087	824.9284972	1267.797973	167.6030323	283.6839074
47.83707662	1009.585457	900.4676852	27171.16733	451.9986372	6384.209412	825.0637276	1269.031956	167.6511384	283.7315884
47.88723524	1009.720867	901.1016277	27189.03359	452.0586813	6385.124056	825.1737875	1270.066033	167.7004614	283.7804756
47.94026654	1009.871798	901.3763077	27207.90643	452.1239187	6386.100109	825.293108	1271.158733	167.7439582	283.823588
48.00572435	1010.06258	901.4800572	27231.17553	452.2054292	6387.309407	825.4420433	1272.506528	167.7924694	283.8716706
48.08019683	1010.28631	901.2497274	27257.61439	452.2996395	6388.692155	825.6139648	1274.038673	167.8400028	283.9187839
48.1335708	1010.434124	901.699911	27276.53362	452.3642368	6389.666277	825.7322259	1275.135668	167.8874156	283.9657778
48.18694476	1010.585248	901.9765844	27295.43376	452.4295622	6390.64375	825.8517085	1276.231968	167.9310105	284.0089874
48.25182478	1010.773321	902.0835485	27318.38256	452.5099308	6391.836343	825.99856	1277.563663	167.9789555	284.0565088
48.32532984	1010.992407	901.8897547	27344.34818	452.6023076	6393.193596	826.1671556	1279.071151	168.0263447	284.1034792
48.39218769	1011.192603	901.6537472	27367.93257	452.6864881	6394.427896	826.3207551	1280.441101	168.0680812	284.1448469
48.44627405	1011.338172	902.270897	27386.9821	452.7507806	6395.404692	826.4385636	1281.548256	168.119391	284.1957033
48.4965117	1011.476085	902.7016014	27404.65851	452.8110895	6396.314636	826.5489804	1282.575984	168.1639096	284.2398285
48.55513726	1011.643326	902.8804345	27425.26603	452.8828808	6397.383556	826.6802112	1283.774567	168.2087671	284.2842896
48.62625814	1011.850576	902.8661464	27450.23476	452.9709242	6398.684479	826.8410043	1285.227477	168.2580861	284.3331728
48.69863524	1012.068833	902.4698729	27475.61059	453.0621529	6400.016167	827.0073766	1286.704806	168.2998924	284.3746097
48.75844149	1012.237187	902.7294816	27496.54636	453.1347314	6401.100209	827.1400956	1287.924334	168.3471625	284.4214621
48.80860039	1012.369904	903.3624124	27514.0822	453.1936195	6401.997833	827.2480435	1288.946294	168.3958078	284.4696775
48.8616319	1012.518009	903.6350338	27532.60602	453.2576402	6402.955934	827.3651408	1290.026188	168.4385673	284.5120591
48.92708989	1012.705319	903.7356557	27555.44481	453.3376536	6404.143112	827.5113396	1291.358183	168.4861565	284.5592279
49.00156261	1012.925121	903.5009071	27581.39482	453.430167	6405.500752	827.680159	1292.872365	168.5326237	284.6052844
49.05493692	1013.070095	903.9494549	27599.96421	453.4935428	6406.456867	827.7961883	1293.956498	168.5793067	284.651555
49.10831124	1013.218389	904.2240664	27618.51488	453.55765	6407.416362	827.9134447	1295.039941	168.6221632	284.6940328
49.17319147	1013.403037	904.3279572	27641.03932	453.636542	6408.587139	828.0575974	1296.356013	168.6691993	284.7406531
49.24669663	1013.618264	904.1299107	27666.52478	453.7272516	6409.919726	828.2231454	1297.84581	168.7155431	284.7865875
49.31355471	1013.814957	903.8898969	27689.67311	453.8099186	6411.131628	828.3739783	1299.199683	168.7563271	284.8270111
49.36764143	1013.957657	904.5057946	27708.37036	453.8729793	6412.09028	828.4895363	1300.293841	168.8069106	284.8771476
49.41787941	1014.092915	904.9349934	27725.7199	453.9321469	6412.983397	828.5978675	1301.309504	168.8507479	284.9205975
49.47650519	1014.257076	905.1112727	27745.94635	454.0026112	6414.032718	828.7266732	1302.494012	168.8947936	284.964254
49.54762621	1014.460606	905.0933218	27770.45336	454.0890493	6415.309909	828.8845321	1303.929854	168.9431166	285.01215
49.62000356	1014.675101	904.6923915	27795.36003	454.1786513	6416.617506	829.0479305	1305.389829	168.9838906	285.0525637
49.67981017	1014.840323	904.9495902	27815.9087	454.2498809	6417.681633	829.1781844	1306.595028	169.03034	285.0986026
49.72996935	1014.970395	905.5815283	27833.12021	454.3076342	6418.562547	829.2840591	1307.604977	169.0783202	285.1461588
49.78300106	1015.115725	905.8521289	27851.30148	454.3704608	6419.503021	829.3989741	1308.672175	169.1203559	285.1878231
49.84845922	1015.299627	905.9496809	27873.71793	454.4490046	6420.668482	829.5424869	1309.988508	169.1670402	285.2340949
49.92293217	1015.515573	905.7105947	27899.18814	454.5398522	6422.001471	829.7082614	1311.484884	169.2124608	285.2791141
49.97630683	1015.657757	906.1575368	27917.41415	454.6020291	6422.939906	829.8220998	1312.556266	169.2584275	285.3246746
50.02968149	1015.803273	906.4301244	27935.62182	454.6649406	6423.88175	829.9371711	1313.626964	169.3005593	285.3664341
50.09456194	1015.984559	906.5309984	27957.72975	454.7423831	6425.031107	830.0786747	1314.92755	169.3467032	285.4121702
50.16806719	1016.195997	906.3287776	27982.74395	454.8314562	6426.339478	830.2412312	1316.39981	169.3920209	285.4570875
50.2349255	1016.389252	906.0848309	28005.4643	454.9126377	6427.529389	830.3893484	1317.737746	169.43187	285.4965845
50.28901257	1016.529134	906.6994998	28023.81578	454.9744892	6428.470227	830.5026973	1318.819022	169.4817406	285.5460144
50.33925087	1016.661785	907.1272208	28040.8445	455.0325365	6429.346822	830.6089814	1319.822725	169.524909	285.5888014
50.39787687	1016.822923	907.3009932	28060.69693	455.1016983	6430.376902	830.7354066	1320.993281	169.568158	285.6316682
50.46899804	1017.0228	907.279447	28084.75077	455.1865607	6431.630792	830.8903855	1322.412205	169.6155035	285.6785952
50.54137564	1017.233603	906.8739455	28109.19697	455.2745659	6432.914736	831.0508646	1323.854977	169.6552641	285.7180045
50.60118258	1017.395749	907.1287786	28129.36569	455.3444715	6433.95931	831.1786989	1325.045974	169.700908	285.7632451
50.65134204	1017.523224	907.7597422	28146.25889	455.4011109	6434.823818	831.2825385	1326.044016	169.7482353	285.8101542
50.70437394	1017.665831	908.0283593	28164.10394	455.4627653	6435.746986	831.3953115	1327.09863	169.7895606	285.8511143
50.76983228	1017.846385	908.1228978	28186.10587	455.5398665	6436.891124	831.5361877	1328.399439	169.8353567	285.8965058
50.84430546	1018.058546	907.8795539	28211.10515	455.6290791	6438.19991	831.6989733	1329.878165	169.8797501	285.9405068
50.89768045	1018.197991	908.3249199	28228.99414	455.6900791	6439.120986	831.8106613	1330.936908	169.9250137	285.9853704
50.95105545	1018.34078	908.5955207	28246.86515	455.7518169	6440.0455	831.9235877	1331.994975	169.9664341	286.0264249
51.01593611	1018.518764	908.6934336	28268.56428	455.8278366	6441.173828	832.0624909	1333.28021	170.0117022	286.0712929
51.08944146	1018.726482	908.4871152	28293.11594	455.9153034	6442.458422	832.2221111	1334.735089	170.0560129	286.115212
51.15629999	1018.916361	908.2393081	28315.41623	455.9950267	6443.626743	832.3675626	1336.057228	170.0949443	286.1537994
51.21038741	1019.053478	908.8527707	28333.42834	456.0556914	6444.55009	832.4787431	1337.125735	170.1441151	286.2025358
51.26062601	1019.183569	909.279041	28350.14217	456.1126389	6445.410463	832.5830177	1338.117583	170.1866271	286.2446721
51.31925224	1019.341738	909.4503528	28369.62751	456.1805221	6446.421651	832.7071062	1339.27431	170.229094	286.2867637
51.39037354	1019.538029	909.4252774	28393.23656	456.263838	6447.652664	832.8592582	1340.676467	170.2754799	286.3327397
51.46275139	1019.745206	909.0152889	28417.23081	456.3502757	6448.913385	833.0168718	1342.102189	170.3142459	286.3711631
51.52255867	1019.904333	909.2677998	28437.02661	456.4188816	6449.938762	833.1423309	1343.279107	170.3590992	286.4156201
51.5727184	1020.029259	909.897807	28453.60739	456.4744276	6450.787162	833.2441729	1344.265348	170.4057856	286.461894
51.62575049	1020.169191	910.1644771	28471.12245	456.5349315	6451.693339	833.3548433	1345.307491	170.4464136	286.502163
51.69120899	1020.34646	910.2560575	28492.71752	456.6106167	6452.816543	833.4931315	1346.592913	170.4913379	286.5466903
51.7656824	1020.554904	910.0085343	28517.25461	456.6982244	6454.101566	833.6529833	1348.054145	170.534723	286.589692
51.81905773	1020.691661	910.4523531	28534.8128	456.7580691	6455.005598	833.7625604	1349.100362	170.5792964	286.6338716
51.87243305	1020.831771	910.7210038	28552.35338	456.8186547	6455.913097	833.8733813	1350.145908	170.6200187	286.6742339
51.93731392	1021.006514	910.81601	28573.65128	456.893278	6457.020777	834.0097321	1351.41593	170.6644272	286.71825
52.01081936	1021.21058	910.6056694	28597.74897	456.979168	6458.282027	834.16647	1352.853582	170.7077493	286.7611893
52.07767812	1021.397145	910.3540729	28619.63697	457.0574599	6459.429151	834.3093049	1354.160065	170.7457799	286.7988839
52.13176588	1021.531546	910.9663514	28637.31599	457.1169596	6460.335324	834.4183569	1355.215917	170.794264	286.8469395
52.18200478	1021.659124	911.3911979	28653.72076	457.1728276	6461.179772	834.5206591	1356.196016	170.8361315	286.8884371
52.24063121	1021.814378	911.5600943	28672.84579	457.2394558	6462.172411	834.6424538	1357.339037	170.8778308	286.9297679
52.31175266	1022.007149	911.5315547	28696.01829	457.3212535	6463.380964	834.791831	1358.724575	170.9232748	286.9748104
52.38413075	1022.210766	911.1171616	28719.56896	457.4061527	6464.618884	834.9466318	1360.133399	170.9610646	287.0122662
52.44393837	1022.366928	911.3673931	28738.99874	457.4734829	6465.625412	835.0697595	1361.296366	171.0051418	287.0559539
52.49409836	1022.489351	911.9964614	28755.27287	457.5279556	6466.457996	835.1696408	1362.270911	171.0511992	287.1016044
52.54713063	1022.626658	912.2612204	28772.46404	457.5873301	6467.347492	835.2782472	1363.300693	171.0911428	287.141195
52.6125893	1022.8007	912.3498972	28793.6598	457.6616253	6468.450141	835.413995	1364.570866	171.1352114	287.1848742
52.68706294	1023.005495	912.0982715	28817.74324	457.7476577	6469.711834	835.5709671	1366.014762	171.1776068	287.2268949
52.74043858	1023.139612	912.5405717	28834.97676	457.8063685	6470.599133	835.6784721	1367.048563	171.2215028	287.270403
52.79381422	1023.277094	912.807308	28852.19302	457.8658232	6471.489926	835.7872263	1368.081702	171.2615397	287.3100861
52.8586953	1023.448655	912.8994611	28873.09711	457.9390756	6472.577334	835.9210717	1369.336646	171.3051045	287.3532659
52.93220084	1023.649134	912.6851724	28896.74923	458.0234179	6473.815664	836.0749804	1370.757225	171.3474563	287.3952435
52.99905982	1023.832445	912.4298562	28918.23257	458.1003048	6474.941976	836.2152469	1372.048193	171.3846028	287.4320618
53.0531479	1023.96418	913.0409725	28935.58466	458.1586609	6475.831289	836.3222095	1373.091503	171.4324127	287.4794492
53.1033871	1024.089291	913.4644212	28951.68609	458.2134693	6476.660099	836.4225755	1374.059959	171.4736478	287.5203199
53.16201374	1024.241684	913.6309466	28970.45749	458.2788656	6477.634528	836.5421189	1375.189397	171.5145935	287.5609038
53.23313533	1024.430998	913.5990066	28993.20151	458.3591731	6478.821028	836.6887722	1376.558466	171.5591131	287.60503
53.30551366	1024.63112	913.1802901	29016.31681	458.4425621	6480.036562	836.8408121	1377.950545	171.5959446	287.641536
53.3653216	1024.784372	913.4282841	29035.38735	458.50864	6481.024585	836.9616513	1379.099685	171.6392601	287.6844688
53.41548185	1024.904336	914.0564308	29051.3605	458.5620592	6481.841641	837.0596078	1380.06264	171.6847001	287.7295072
53.4685143	1025.039066	914.3193137	29068.23378	458.6203251	6482.714758	837.1661883	1381.080172	171.7239719	287.768432
53.53397313	1025.209941	914.4051405	29089.03761	458.693256	6483.797227	837.2994426	1382.335233	171.7672005	287.8112787
53.60844699	1025.411153	914.1494878	29112.67579	458.777742	6485.036013	837.4535879	1383.761949	171.8086245	287.8523366
53.66182295	1025.542678	914.5902972	29129.59065	458.8353397	6485.906883	837.559059	1384.783448	171.8518556	287.8951856
53.71519891	1025.677578	914.8551545	29146.4886	458.8936843	6486.781275	837.6657846	1385.804291	171.8912197	287.934202
53.78008018	1025.846015	914.9445068	29167.00616	458.9655911	6487.848779	837.7971706	1387.044294	171.9339564	287.976561
53.85358582	1026.042974	914.7263427	29190.22096	459.0484142	6489.064607	837.9483022	1388.447955	171.9753558	288.0175945
53.92044501	1026.22309	914.4673754	29211.30713	459.123922	6490.170485	838.0860476	1389.723548	172.0116345	288.0535526
53.97453342	1026.352208	915.0773507	29228.33835	459.1811555	6491.043243	838.1909593	1390.75443	172.0587827	288.1002842
54.02477291	1026.474896	915.4994273	29244.14204	459.2349238	6491.856701	838.2894248	1391.711347	172.0993969	288.1405396
54.08339976	1026.62448	915.6636254	29262.56635	459.2991109	6492.81325	838.4067582	1392.827327	172.1396031	288.1803904
54.15452149	1026.8104	915.6283476	29284.88982	459.3779556	6493.978099	838.5507379	1394.180076	172.1832153	288.2236173
54.22690005	1027.00709	915.2053873	29307.57781	459.4598622	6495.171654	838.7000677	1395.555561	172.2191062	288.259191
54.28670831	1027.157485	915.451185	29326.29575	459.5247109	6496.141508	838.8186604	1396.691	172.261674	288.3013827
54.33686881	1027.275037	916.078427	29341.9735	459.577096	6496.943319	838.9147278	1397.64247	172.306508	288.3458205
54.38990144	1027.407235	916.3394683	29358.53476	459.6342736	6497.800355	839.0193196	1398.647864	172.3451204	288.3840917
54.45536043	1027.575001	916.4224974	29378.95392	459.7058654	6498.863012	839.1501262	1399.887951	172.3875246	288.4261212
54.52983451	1027.772696	916.162892	29402.15509	459.7888335	6500.079307	839.3014968	1401.297644	172.4279951	288.466234
54.58321077	1027.901676	916.6022381	29418.75718	459.8453386	6500.934047	839.4049715	1402.306952	172.4705734	288.5084362
54.63658704	1028.034042	916.8652508	29435.3427	459.9025935	6501.792335	839.5097057	1403.31561	172.5092773	288.546798
54.70146851	1028.199411	916.951854	29455.4809	459.9731795	6502.840297	839.6386777	1404.540808	172.5512011	288.5883513
54.77497425	1028.392914	916.7298858	29478.26647	460.0545114	6504.034033	839.7870834	1405.927707	172.5916657	288.6284583
54.84183365	1028.569893	916.4673346	29498.96282	460.1286654	6505.119848	839.922354	1407.188065	172.6270926	288.6635722
54.89592238	1028.696441	917.0761899	29515.67909	460.1847971	6505.976354	840.0252526	1408.206632	172.6735912	288.7096599
54.94616215	1028.816751	917.4969196	29531.19056	460.2375444	6506.774739	840.1218525	1409.152116	172.7135961	288.7493113
55.0047892	1028.963576	917.6588333	29549.2742	460.3005445	6507.713733	840.2370167	1410.254759	172.7530763	288.7884426
55.07591106	1029.146165	917.6202791	29571.18492	460.3779534	6508.857325	840.3783719	1411.591339	172.7957979	288.8307867
55.14828985	1029.339486	917.1931531	29593.4535	460.4584049	6510.029301	840.5250415	1412.950381	172.8307656	288.8654454
55.20809842	1029.487075	917.4367949	29611.82536	460.522047	6510.981316	840.6414292	1414.072245	172.8725995	288.9069097
55.25825917	1029.602258	918.0631487	29627.21317	460.573417	6511.768159	840.735642	1415.012335	172.9168386	288.9507579
55.31129198	1029.731972	918.3223824	29643.46819	460.6295265	6512.609406	840.8382819	1416.005702	172.9548038	288.9883876
55.37675112	1029.896685	918.4026654	29663.5098	460.6998037	6513.652611	840.9666859	1417.230952	172.9963987	289.029615
55.45122542	1030.090926	918.13918	29686.28204	460.7812819	6514.846826	841.1153329	1418.623778	173.0359333	289.0688002
55.50460199	1030.217408	918.5770895	29702.57715	460.8367144	6515.685728	841.2168478	1419.621007	173.0778711	289.1103673
55.55797856	1030.347286	918.8382916	29718.85602	460.8928997	6516.528206	841.3196274	1420.617593	173.1159268	289.1480868
55.62286023	1030.509644	918.9221963	29738.62187	460.9621893	6517.556983	841.4462298	1421.828122	173.1570527	289.1888493
55.69636605	1030.699753	918.6964942	29760.98616	461.0420574	6518.729027	841.5919597	1423.198411	173.1965997	289.2280468
55.76322566	1030.873652	918.4304249	29781.2999	461.1148826	6519.795146	841.7248013	1424.443675	173.2311905	289.262332
55.8173147	1030.997678	919.0381808	29797.70706	461.1699327	6520.635694	841.8257237	1425.45004	173.2770517	289.3077878
55.86755475	1031.115653	919.4575885	29812.9317	461.2216778	6521.41928	841.9204924	1426.384197	173.3164584	289.3468464
55.926182	1031.25977	919.6172596	29830.68098	461.2835128	6522.341039	842.0335272	1427.473627	173.355226	289.3852714
55.997304	1031.439087	919.5754894	29852.18658	461.3595123	6523.463761	842.1723064	1428.794185	173.3970734	289.426749
56.06968301	1031.629101	919.1442744	29874.04351	461.4385355	6524.61455	842.3163648	1430.136937	173.4311349	289.4605095
56.12949189	1031.773935	919.3857999	29892.0757	461.5009932	6525.549051	842.430588	1431.24535	173.4722485	289.5012598
56.17965288	1031.886793	920.011282	29907.17894	461.5513669	6526.321198	842.5229805	1432.174165	173.5159038	289.5445293
56.23268586	1032.014067	920.2687413	29923.13339	461.6064278	6527.146945	842.6237043	1433.155618	173.5532337	289.5815293
56.29814516	1032.175782	920.3463287	29942.80443	461.6754147	6528.171051	842.7497499	1434.366168	173.5940343	289.6219694
56.37261967	1032.366634	920.0790347	29965.15568	461.7554304	6529.343587	842.8957234	1435.742282	173.6326502	289.6602441
56.42599653	1032.490662	920.5155342	29981.14949	461.8098102	6530.166941	842.9953147	1436.727544	173.6739591	289.701188
56.47937339	1032.618097	920.7749589	29997.12738	461.8649456	6530.993896	843.0961756	1437.71217	173.7113787	289.738277
56.54425526	1032.777499	920.8562148	30016.52778	461.9329625	6532.003836	843.2204521	1438.908166	173.7517215	289.7782632
56.61776117	1032.964276	920.6268474	30038.47858	462.0113938	6533.154584	843.3635555	1440.262	173.7903679	289.8165681
56.68462099	1033.135152	920.357325	30058.41679	462.0829146	6534.201364	843.4940126	1441.492309	173.824138	289.8500398
56.73871034	1033.2567	920.9640016	30074.52055	462.136903	6535.026245	843.5929953	1442.486586	173.8693733	289.8948754
56.78895066	1033.372383	921.3821115	30089.46369	462.1876644	6535.795301	843.6859666	1443.40952	173.908193	289.9333521
56.8475781	1033.513841	921.5395815	30106.88479	462.2483557	6536.700139	843.7969112	1444.485859	173.9462612	289.9710839
56.91870023	1033.689947	921.4946544	30127.99276	462.3229719	6537.80237	843.9331618	1445.790545	173.9872505	290.011711
56.99107947	1033.876714	921.0594257	30149.44567	462.400593	6538.932359	844.074657	1447.117158	174.0204225	290.0445899
57.05088864	1034.018844	921.2988739	30167.14447	462.4618882	6539.849665	844.1867556	1448.212246	174.0608291	290.0846393
57.10104987	1034.129418	921.9235002	30181.9684	462.5112837	6540.607383	844.2773613	1449.129891	174.1039112	290.1273408
57.15408302	1034.254297	922.1792178	30197.62784	462.5653155	6541.417911	844.3762042	1450.099539	174.1406175	290.1637228
57.21954247	1034.413069	922.2541591	30216.93516	462.6330358	6542.423267	844.4999349	1451.295526	174.1806385	290.2033901
57.29401719	1034.600592	921.9831267	30238.87322	462.7116159	6543.574519	844.6432842	1452.655085	174.2183527	290.2407711
57.34739434	1034.722213	922.4182421	30254.57129	462.7649623	6544.382607	844.7409873	1453.628491	174.2590445	290.2811032
57.4007715	1034.847249	922.6759222	30270.25379	462.8190671	6545.194321	844.8399648	1454.601267	174.2958396	290.3175732
57.46565355	1035.003748	922.7545779	30289.29548	462.8858348	6546.185767	844.9619581	1455.782866	174.3354137	290.3567976
57.53915955	1035.187254	922.5216128	30310.84046	462.9628558	6547.315607	845.1024835	1457.120399	174.373176	290.3942262
57.60601957	1035.355162	922.2487008	30330.41009	463.0330963	6548.343401	845.2306001	1458.335894	174.4061406	290.4268995
57.66010922	1035.474278	922.854318	30346.21606	463.0860425	6549.1529	845.3276788	1459.318195	174.4507617	290.4711263
57.7103498	1035.58771	923.2711539	30360.88289	463.1358383	6549.907691	845.4188856	1460.230011	174.4890052	290.5090318
57.76897744	1035.726558	923.4264632	30377.98189	463.195407	6550.795915	845.5277786	1461.293382	174.5263869	290.5460832
57.8400997	1035.899511	923.3784374	30398.6996	463.2686652	6551.878029	845.6615471	1462.582345	174.5665339	290.5858755
57.91247915	1036.08309	922.939269	30419.75595	463.3449101	6552.987596	845.8005263	1463.89297	174.5988329	290.617889
57.97228862	1036.222565	923.176678	30437.12753	463.4050641	6553.888019	845.9105395	1464.974857	174.6385454	290.6572506
58.02245008	1036.330897	923.8004642	30451.67732	463.4534997	6554.631572	845.9993912	1465.881437	174.681065	290.6993945
58.0754834	1036.453425	924.0544721	30467.04721	463.5065212	6555.427158	846.096388	1466.839391	174.7171592	290.7351698
58.140943	1036.609308	924.1268162	30485.99755	463.5729982	6556.414105	846.2178464	1468.020953	174.756415	290.7740786
58.21541792	1036.793563	923.8521142	30507.53006	463.6501692	6557.54446	846.3586197	1469.364111	174.7932441	290.8105824
58.26879536	1036.912819	924.2858708	30522.93787	463.7025013	6558.33756	846.4544694	1470.325773	174.83333	290.850314
58.3221728	1037.035501	924.5418384	30538.33042	463.7555944	6559.134311	846.5515982	1471.286811	174.8695123	290.8861766
58.38705503	1037.18915	924.6179419	30557.02006	463.821136	6560.1076	846.6713504	1472.454148	174.9083318	290.9246531
58.46056113	1037.369445	924.3814453	30578.16671	463.8967725	6561.216912	846.8093451	1473.775533	174.9452265	290.9612217
58.52742135	1037.534438	924.1052061	30597.37459	463.9657563	6562.226066	846.9351643	1474.976352	174.9774004	290.9931113
58.58151128	1037.651167	924.7097834	30612.88828	464.0176796	6563.020463	847.0303741	1475.94679	175.0214186	291.0367406
58.63175213	1037.762389	925.1253687	30627.28392	464.0665275	6563.761248	847.119849	1476.847594	175.0590964	291.0740854
58.69037995	1037.898675	925.2785571	30644.06677	464.1249943	6564.633161	847.2267281	1477.898118	175.0958042	291.1104689
58.76150234	1038.068532	925.2274897	30664.40144	464.1969196	6565.695525	847.3580602	1479.171506	175.1351246	291.1494417
58.83388201	1038.24898	924.784454	30685.06858	464.2718136	6566.785041	847.4945698	1480.466295	175.1665666	291.1806059
58.89369177	1038.385849	925.0198615	30702.11898	464.3308475	6567.66889	847.6025359	1481.535106	175.2055979	291.2192923
58.94385346	1038.49198	925.642823	30716.3997	464.3783406	6568.398535	847.6896659	1482.430725	175.2475653	291.2608889
58.99688694	1038.6122	925.8951527	30731.4854	464.4303705	6569.179452	847.7848505	1483.377095	175.2830588	291.2960688
59.06234669	1038.765246	925.9649473	30750.08537	464.4956272	6570.148324	847.9040785	1484.544368	175.3215634	291.3342331
59.13682181	1038.946293	925.6866433	30771.21983	464.571415	6571.258163	848.0423233	1485.871281	175.3575239	291.3698758
59.19019953	1039.063228	926.1190662	30786.34275	464.6227513	6572.036548	848.1363536	1486.821309	175.3970151	291.409018
59.24357724	1039.183597	926.3733527	30801.45072	464.6748515	6572.818609	848.2316678	1487.770721	175.4325957	291.4442843
59.30845966	1039.334449	926.446951	30819.79482	464.7391894	6573.774071	848.3492202	1488.923931	175.4706747	291.4820267
59.38196585	1039.511591	926.2069879	30840.55052	464.8134671	6574.86323	848.4847309	1490.229321	175.5067176	291.5177512
59.44882626	1039.673723	925.9274828	30859.40333	464.8812173	6575.854082	848.608295	1491.415604	175.5381155	291.5488716
59.50291648	1039.788108	926.5310392	30874.63015	464.9321364	6576.633652	848.7016702	1492.374292	175.5815419	291.5919143
59.55315759	1039.897161	926.9453971	30888.75962	464.9800539	6577.360687	848.789445	1493.264188	175.6186645	291.6287088
59.61178559	1040.03093	927.0965036	30905.23217	465.0374391	6578.216586	848.8943474	1494.301988	175.654711	291.6644368
59.68290811	1040.197748	927.0424504	30925.19089	465.108056	6579.259559	849.023288	1495.559949	175.6932198	291.7026053
59.75528799	1040.375124	926.5956188	30945.47601	465.181624	6580.32939	849.1573735	1496.839051	175.7238207	291.7329358
59.81509803	1040.509433	926.8290615	30962.21119	465.2395584	6581.196966	849.2633301	1497.894911	175.7621833	291.7709594
59.86525994	1040.613404	927.4512135	30976.22782	465.2861265	6581.912956	849.3487702	1498.779673	175.8036088	291.8120189
59.91829359	1040.731357	927.7018959	30991.03458	465.337183	6582.679471	849.442176	1499.71457	175.8385126	291.8466143
59.98375348	1040.881619	927.7691879	31009.29066	465.4012418	6583.630598	849.5592146	1500.867689	175.8762799	291.8840478
60.0582288	1041.059515	927.4873482	31030.03443	465.4756719	6584.720296	849.6949775	1502.178512	175.9113877	291.9188454
60.11160679	1041.174171	927.9184619	31044.87774	465.5260309	6585.484233	849.787222	1503.117018	175.9502952	291.9574091
60.16498478	1041.292272	928.1710983	31059.70639	465.5771563	6586.251871	849.8807549	1504.054914	175.9852854	291.99209
60.22986737	1041.440377	928.2422375	31077.71134	465.6403128	6587.189832	849.9961479	1505.194132	176.0226374	292.029112
60.30337365	1041.614423	927.9988718	31098.08333	465.7132566	6588.259204	850.1292204	1506.483679	176.0578444	292.0640078
60.37023425	1041.773746	927.7161608	31116.58764	465.7797959	6589.232089	850.2505709	1507.655566	176.0884805	292.0943732
60.42432476	1041.88583	928.3187152	31131.5329	465.8297294	6589.997102	850.3421453	1508.602615	176.131326	292.1368402
60.47456611	1041.992753	928.7318681	31145.40111	465.8767337	6590.710636	850.4282514	1509.481706	176.1679036	292.1730946
60.5331943	1042.124052	928.8809311	31161.56911	465.9330571	6591.550814	850.5312134	1510.506904	176.2033009	292.208179
60.60431694	1042.287886	928.8239472	31181.15883	466.0023897	6592.574748	850.6578065	1511.749586	176.2410133	292.2455582
60.67669703	1042.462245	928.3733895	31201.06901	466.0746562	6593.625253	850.7895125	1513.013152	176.2707885	292.2750703
60.73650735	1042.594042	928.6049036	31217.49479	466.1315112	6594.476853	850.8934968	1514.056184	176.3084949	292.3124434
60.78666947	1042.695891	929.2262609	31231.25221	466.1771714	6595.179437	850.977278	1514.930193	176.3493884	292.3529756
60.83970328	1042.811619	929.4753263	31245.7852	466.2272725	6595.931812	851.0689378	1515.853727	176.3837134	292.3869973
60.90516331	1042.959147	929.5401619	31263.70375	466.2901554	6596.865518	851.1838273	1516.992828	176.420757	292.4237136
60.97963883	1043.133951	929.2548516	31284.06407	466.3632528	6597.93544	851.317154	1518.287715	176.4550278	292.4576815
61.03301708	1043.24637	929.6846802	31298.63293	466.4126524	6598.685193	851.4076455	1519.21481	176.4933624	292.4956774
61.08639534	1043.362242	929.9356969	31313.18743	466.4628211	6599.438671	851.49943	1520.1413	176.5277729	292.5297839
61.15127811	1043.50765	930.0044221	31330.85951	466.5248179	6600.359449	851.6127035	1521.266661	176.5644114	292.5660986
61.22478448	1043.678657	929.7577165	31350.85488	466.5964524	6601.409396	851.7433826	1522.540519	176.5987979	292.6001812
61.29164526	1043.835223	929.4718588	31369.01715	466.6618031	6602.36464	851.8625603	1523.698146	176.6286863	292.6298055
61.34573604	1043.945047	930.0734295	31383.68605	466.7107691	6603.115362	851.9523671	1524.633669	176.6709617	292.6717073
61.39597765	1044.049879	930.4853996	31397.29784	466.7568769	6603.815642	852.0368352	1525.50206	176.7070044	292.7074315
61.45460601	1044.178753	930.6324566	31413.16692	466.8121582	6604.640384	852.1378925	1526.514777	176.7417644	292.7418844
61.52572877	1044.339658	930.5725961	31432.39447	466.8802302	6605.645628	852.2621814	1527.742326	176.778695	292.7784887
61.59810907	1044.511055	930.1183809	31451.93664	466.9512191	6606.677159	852.3915517	1528.990506	176.8076599	292.8071976
61.65791966	1044.640385	930.3480019	31468.05875	467.0070147	6607.513073	852.4935999	1530.020834	176.844722	292.8439322
61.708082	1044.740152	930.9685791	31481.56176	467.0517835	6608.202496	852.5757528	1530.884194	176.8850934	292.8839468
61.76111596	1044.853696	931.2160572	31495.82604	467.1009468	6608.940988	852.6656987	1531.796475	176.9188502	292.9174054
61.82657613	1044.998539	931.2784816	31513.41331	467.1626755	6609.857591	852.7784788	1532.921694	176.9551835	292.9534176
61.90105184	1045.170307	930.9897647	31533.39727	467.2344648	6610.908098	852.9094142	1534.200799	176.9886328	292.9865713
61.95443036	1045.280529	931.4183318	31547.69675	467.2829227	6611.643926	852.9981849	1535.116592	177.0264051	293.0240098
62.00780888	1045.394214	931.6677585	31561.98218	467.3321522	6612.383501	853.0882531	1536.031787	177.0602467	293.0575524
62.07269182	1045.536975	931.7341144	31579.32754	467.3930107	6613.28741	853.1994462	1537.143424	177.0961848	293.0931729
62.14619827	1045.704999	931.4841303	31598.95327	467.4633601	6614.318285	853.327776	1538.401744	177.1297659	293.1264572
62.21305924	1045.858857	931.1951838	31616.77982	467.527544	6615.256211	853.4448209	1539.545251	177.1589204	293.1553541
62.2671503	1045.966463	931.7957889	31631.17747	467.5755604	6615.992901	853.5328926	1540.469359	177.2006361	293.1967012
62.31739214	1046.069242	932.2065979	31644.53759	467.6207882	6616.680169	853.6157529	1541.327153	177.2361538	293.2319051
62.37602067	1046.195735	932.351686	31660.11328	467.6750466	6617.489757	853.7149406	1542.32751	177.2702884	293.265738
62.44714356	1046.353764	932.2890017	31678.98537	467.7418811	6618.476651	853.8369678	1543.540074	177.3064516	293.3015817
62.51952405	1046.522253	931.8311964	31698.16633	467.8116159	6619.489553	853.9640454	1544.773016	177.3346211	293.3295022
62.57933491	1046.649162	932.0589591	31713.99039	467.8663716	6620.310067	854.0641931	1545.790764	177.3710508	293.3656101
62.62949746	1046.746884	932.6787706	31727.24369	467.9102657	6620.986569	854.1447477	1546.643579	177.4109097	293.4051167
62.68253157	1046.858283	932.9246907	31741.24423	467.9585083	6621.711432	854.2330113	1547.544715	177.4441089	293.4380226
62.74799189	1047.000492	932.9847482	31758.50635	468.0191041	6622.611243	854.3437208	1548.656187	177.479745	293.4733437
62.82246778	1047.169279	932.6926874	31778.12091	468.0896093	6623.642689	854.4723089	1549.919664	177.5123879	293.5056982
62.87584656	1047.277344	933.1200162	31792.15601	468.1371429	6624.364845	854.5593906	1550.824264	177.5496082	293.5425896
62.92922534	1047.388881	933.3678822	31806.17734	468.1854505	6625.090772	854.6477741	1551.728274	177.5828914	293.5755787
62.99410845	1047.529043	933.4319123	31823.20203	468.2451917	6625.978119	854.756925	1552.826322	177.6181421	293.6105179
63.06761498	1047.694138	933.1787102	31842.46495	468.3142796	6626.99027	854.8829489	1554.069255	177.6509326	293.6430186
63.13447613	1047.845338	932.8867319	31859.96199	468.3773183	6627.911193	854.9979003	1555.198779	177.6793667	293.6712015
63.18856745	1047.950766	933.486389	31874.09342	468.4244025	6628.634107	855.0842689	1556.111584	177.7205332	293.7120042
63.23880953	1048.05153	933.8960584	31887.20651	468.4687666	6629.3086	855.1655508	1556.958885	177.7555355	293.7466972
63.29743824	1048.175686	934.0392137	31902.49424	468.5220208	6630.10331	855.2629034	1557.947002	177.7890561	293.7799216
63.36856124	1048.330892	933.9737577	31921.01744	468.5876407	6631.072189	855.3827105	1559.144727	177.8244662	293.8150188
63.44094193	1048.496526	933.5124284	31939.84389	468.6561446	6632.066802	855.5075377	1560.362581	177.8518549	293.8421654
63.50075305	1048.621057	933.738367	31955.37541	468.7098795	6632.872198	855.60582	1561.367871	177.887664	293.8776581
63.55091581	1048.716772	934.3574269	31968.38362	468.7529148	6633.536014	855.6848057	1562.210243	177.9270198	293.9166662
63.60395007	1048.826065	934.6018176	31982.1253	468.8002538	6634.247496	855.771418	1563.100345	177.9596717	293.9490295
63.66941052	1048.965687	934.6595519	31999.06829	468.8597376	6635.130821	855.880095	1564.198203	177.9946234	293.9836724
63.7438866	1049.131548	934.3642088	32018.32028	468.9289824	6636.143554	856.006379	1565.446205	178.0264748	294.0152424
63.79726563	1049.237496	934.790322	32032.09588	468.9756086	6636.852288	856.0918028	1566.339723	178.0631533	294.0515967
63.85064466	1049.346924	935.0366561	32045.858	469.0230114	6637.564815	856.1785327	1567.232657	178.0958884	294.0840425
63.91552794	1049.484534	935.0984032	32062.56795	469.0816557	6638.435901	856.285679	1568.317248	178.1304643	294.1183129
63.98903456	1049.646754	934.8420424	32081.47478	469.1495054	6639.42967	856.4094394	1569.544946	178.1624789	294.1500446
64.05589588	1049.795344	934.547088	32098.64841	469.21142	6640.3339	856.5223359	1570.660624	178.190206	294.1775266
64.10998746	1049.898635	935.1458147	32112.51853	469.2575892	6641.043291	856.6070327	1571.562237	178.2308332	294.2177949
64.16022978	1049.99742	935.5543653	32125.38917	469.3011054	6641.705241	856.6867655	1572.399147	178.2653297	294.2519866
64.21885865	1050.119281	935.6956234	32140.39427	469.353374	6642.485344	856.7823167	1573.375145	178.2982478	294.2846137
64.28998177	1050.271715	935.6274467	32158.57503	469.4178017	6643.436536	856.8999446	1574.558177	178.3329185	294.3189781
64.36236265	1050.434547	935.1626584	32177.05352	469.4850972	6644.413195	857.0225628	1575.761091	178.3595409	294.3453652
64.42217403	1050.556744	935.3868066	32192.29791	469.5378302	6645.203747	857.119014	1576.754046	178.3947408	294.3802541
64.47233699	1050.650488	936.0051286	32205.06557	469.5800225	6645.855109	857.1964597	1577.586078	178.4336028	294.4187727
64.5253714	1050.757714	936.2480181	32218.55318	469.6264746	6646.553455	857.2814511	1578.465253	178.4657174	294.4506035
64.59083198	1050.894796	936.3034719	32235.18294	469.6848668	6647.420594	857.388133	1579.549633	178.4999974	294.4845806
64.66530824	1051.057784	936.0049069	32254.07908	469.7528744	6648.414955	857.5121555	1580.782312	178.531072	294.5153806
64.71868752	1051.161654	936.429827	32267.59998	469.79861	6649.110512	857.5959519	1581.664857	178.5672187	294.5512079
64.7720668	1051.269012	936.6746573	32281.10767	469.8451245	6649.809883	857.6810586	1582.546824	178.5994157	294.5831204
64.83695024	1051.404117	936.7341635	32297.50871	469.9026923	6650.665006	857.7862373	1583.618091	178.6333294	294.6167343
64.91045694	1051.563513	936.4747021	32316.06604	469.9693266	6651.640729	857.9077758	1584.830705	178.6645823	294.6477111
64.97731844	1051.709542	936.1768265	32332.92224	470.0301378	6652.52857	858.0186552	1585.932673	178.6916153	294.6745053
65.03141028	1051.810734	936.7746398	32346.53589	470.0754088	6653.224683	858.1017111	1586.823203	178.7317134	294.714249
65.08165282	1051.907576	937.1820923	32359.16856	470.1180928	6653.874319	858.1799232	1587.649826	178.7657133	294.7479485
65.14028186	1052.027185	937.3214882	32373.89626	470.1693939	6654.640083	858.2737063	1588.613824	178.7980399	294.7799894
65.2114051	1052.176897	937.2506409	32391.74092	470.2326513	6655.573911	858.3891951	1589.782309	178.831985	294.8136346
65.28378617	1052.336977	936.7824573	32409.87789	470.2987608	6656.532942	858.5096451	1590.970431	178.8578551	294.8392761
65.34359779	1052.456883	937.0048479	32424.84046	470.3505103	6657.308922	858.6042988	1591.951172	178.8924571	294.8735723
65.39376095	1052.548692	937.6224456	32437.37201	470.3918752	6657.948056	858.680233	1592.772967	178.9308344	294.9116105
65.44679551	1052.653889	937.8638615	32450.61026	470.4374566	6658.633505	858.7636333	1593.641324	178.9624217	294.9429186
65.51225622	1052.788478	937.9170769	32466.93257	470.4947774	6659.484755	858.868357	1594.712358	178.9960424	294.9762422
65.58673266	1052.948645	937.6153494	32485.47945	470.5615706	6660.461079	858.9901594	1595.929866	179.0263544	295.0062864
65.64011218	1053.050475	938.0390983	32498.75036	470.606432	6661.143698	859.0723585	1596.801547	179.0619791	295.0415963
65.6934917	1053.155801	938.2824524	32512.00834	470.6520746	6661.830154	859.1558719	1597.672657	179.0936481	295.0729854
65.7583753	1053.288446	938.339759	32528.10618	470.7085856	6662.669605	859.2591191	1598.730732	179.1269117	295.1059551
65.83188209	1053.445071	938.0772542	32546.32047	470.7740269	6663.62761	859.3784768	1599.92841	179.157417	295.1361909
65.89874375	1053.588585	937.7765111	32562.86511	470.833755	6664.499362	859.4873763	1601.016806	179.1837688	295.1623098
65.95283584	1053.687716	938.3734279	32576.22704	470.8781443	6665.182439	859.5688214	1601.896364	179.2233474	295.2015387
66.00307861	1053.782651	938.7798024	32588.62614	470.9200114	6665.819986	859.6455408	1602.712801	179.25686	295.2347552
66.06170781	1053.900048	938.9173703	32603.08156	470.9703629	6666.571672	859.7375884	1603.664919	179.288606	295.2662206
66.13283116	1054.047089	938.8439017	32620.59635	471.0324716	6667.488453	859.8509776	1604.819001	179.3218389	295.2991598
66.20521242	1054.204468	938.3723854	32638.39812	471.0974169	6668.430178	859.9692991	1605.992479	179.3469707	295.3240695
66.26502429	1054.322124	938.5930507	32653.08407	471.148201	6669.191851	860.0621887	1606.961128	179.3809857	295.357784
66.31518765	1054.412034	939.2099375	32665.38389	471.1887538	6669.818981	860.136639	1607.772787	179.4188873	295.3953506
66.36822234	1054.515239	939.4499069	32678.37738	471.2334806	6670.491769	860.2184776	1608.630433	179.449957	295.4261458
66.43368318	1054.647379	939.5009251	32694.39795	471.2897497	6671.327419	860.3212791	1609.688256	179.4829305	295.4588279
66.50815979	1054.804778	939.1960933	32712.60201	471.3553508	6672.286036	860.4409025	1610.890744	179.5124941	295.4881303
66.56153955	1054.904604	939.6186925	32725.62756	471.3993541	6672.955954	860.5215335	1611.751669	179.5476064	295.5229323
66.61491931	1055.007935	939.8605978	32738.64044	471.4441409	6673.629729	860.603483	1612.612029	179.578757	295.5538076
66.67980307	1055.138166	939.9157452	32754.44069	471.4996147	6674.453794	860.7048344	1613.657045	179.6113825	295.5861449
66.75330994	1055.29207	939.650253	32772.31829	471.5638848	6675.394405	860.8220515	1614.839937	179.6411541	295.6156534
66.82017177	1055.433114	939.3466954	32788.55715	471.6225498	6676.250361	860.9290075	1615.914896	179.6668373	295.6411096
66.87426411	1055.530222	939.9427321	32801.672	471.6660738	6676.920641	861.0088714	1616.783591	179.705906	295.6798331
66.92450709	1055.623286	940.3480485	32813.84186	471.707139	6677.54632	861.0841258	1617.589945	179.7389402	295.7125754
66.98313645	1055.738511	940.4838221	32828.03004	471.7565583	6678.284184	861.1744697	1618.530301	179.7701164	295.7434761
67.05425991	1055.88293	940.4077804	32845.22105	471.8175395	6679.184228	861.2857979	1619.670124	179.8026502	295.7757223
67.12664135	1056.037657	939.9329927	32862.69382	471.8813421	6680.108964	861.4020303	1620.829104	179.8270572	295.7999137
67.18645347	1056.153104	940.1519646	32877.10828	471.9311785	6680.856592	861.4931881	1621.785782	179.8604961	295.8330572
67.23661702	1056.241149	940.7681534	32889.18065	471.9709341	6681.471936	861.566182	1622.587408	179.8979308	295.870161
67.28965185	1056.342398	941.0067031	32901.93391	472.014822	6682.132293	861.6464876	1623.434451	179.9284924	295.9004526
67.35511282	1056.472135	941.0555645	32917.65831	472.0700588	6682.952629	861.7474023	1624.479194	179.9608307	295.9325051
67.4295896	1056.626816	940.7476857	32935.52591	472.1344899	6683.893861	861.8648868	1625.666814	179.9896596	295.9610793
67.48296959	1056.724675	941.1691564	32948.31063	472.1776508	6684.55131	861.9439788	1626.517091	180.0242691	295.9953829
67.53634958	1056.826047	941.4096393	32961.08295	472.2215976	6685.212637	862.0243931	1627.366808	180.0549109	296.0257539
67.6012335	1056.953908	941.4626674	32976.59111	472.2760532	6686.021597	862.1238836	1628.398895	180.0869101	296.0574704
67.67474045	1057.105141	941.1942429	32994.13826	472.3391739	6686.945131	862.2389994	1629.567151	180.1159615	296.0862651
67.74160245	1057.243761	940.8879225	33010.07698	472.3967953	6687.78558	862.3440478	1630.628807	180.1409883	296.1110708
67.79569502	1057.338883	941.4830953	33022.94933	472.4394699	6688.443295	862.4223598	1631.48675	180.1795565	296.1492982
67.84593822	1057.430109	941.887373	33034.89418	472.479748	6689.057322	862.4961759	1632.283121	180.2121213	296.1815751
67.90456774	1057.543203	942.0213854	33048.82007	472.5282523	6689.781617	862.5848476	1633.211834	180.2427381	296.2119214
67.97569131	1057.685046	941.9428181	33065.69329	472.5881267	6690.665232	862.6941529	1634.337543	180.2745856	296.2434875
68.04807293	1057.83717	941.4648193	33082.84314	472.6508076	6691.573288	862.8083347	1635.48217	180.2982814	296.2669739
68.10788528	1057.950449	941.6821289	33096.99114	472.6997139	6692.307126	862.8977925	1636.426998	180.3311548	296.2995568
68.15804902	1058.036663	942.2976327	33108.84026	472.7386869	6692.9109	862.9693568	1637.218691	180.3681311	296.3362064
68.21108398	1058.135992	942.5347886	33121.35774	472.7817515	6693.559054	863.0481577	1638.055238	180.398194	296.3660036
68.27654508	1058.26337	942.581533	33136.79146	472.8359749	6694.364354	863.1472204	1639.087034	180.4299088	296.3974382
68.35102203	1058.415382	942.2706632	33154.32881	472.8992575	6695.288519	863.2626054	1640.259934	180.4580167	296.4252977
68.40440225	1058.511311	942.6910262	33166.87716	472.9415917	6695.933726	863.3401866	1641.099671	180.4921325	296.459112
68.45778247	1058.61076	942.9301131	33179.41336	472.9847139	6696.582832	863.419094	1641.938854	180.5222749	296.4889881
68.52266654	1058.736294	942.9810608	33194.63484	473.0381701	6697.376963	863.516758	1642.958143	180.5536594	296.5200952
68.59617357	1058.884904	942.709758	33211.85764	473.1001625	6698.283732	863.6298113	1644.11191	180.5820038	296.5481892
68.66303573	1059.021144	942.4007258	33227.50178	473.1567596	6699.108957	863.7329871	1645.160398	180.6063865	296.5723564
68.71712854	1059.114317	942.9950506	33240.13612	473.1986003	6699.754338	863.8097757	1646.007696	180.6444635	296.6100969
68.76737195	1059.203738	943.3983088	33251.86012	473.2381059	6700.356925	863.8821802	1646.794186	180.6765673	296.6419171
68.82600162	1059.314739	943.5305924	33265.52857	473.2857121	6701.067899	863.9692105	1647.711375	180.7066351	296.6717192
68.8971253	1059.454055	943.4495459	33282.08988	473.3445001	6701.935383	864.07653	1648.823111	180.7378091	296.7026177
68.96950709	1059.603623	942.9683951	33298.92279	473.4060799	6702.827064	864.1886989	1649.953531	180.7608067	296.725412
69.02931968	1059.714773	943.1840732	33312.80925	473.4540732	6703.547365	864.2764883	1650.88663	180.793125	296.7574448
69.0794836	1059.79919	943.7989044	33324.43926	473.4922781	6704.13978	864.3466493	1651.668491	180.8296515	296.7936485
69.1325187	1059.896634	944.0346923	33336.72531	473.5345344	6704.775954	864.4239732	1652.494648	180.8592249	296.8229606
69.19797992	1060.021696	944.0793586	33351.87372	473.5877633	6705.566493	864.5212179	1653.513627	180.8903277	296.8537886
69.27245703	1060.171088	943.7655531	33369.08694	473.6499185	6706.473903	864.6345421	1654.671959	180.9177278	296.8809465
69.32583748	1060.265121	944.1848287	33381.40329	473.6914411	6707.107091	864.7106404	1655.501262	180.9513591	296.9142806
69.37921793	1060.362683	944.4225452	33393.70774	473.7337539	6707.744199	864.7880687	1656.330018	180.9810113	296.9436708
69.44410214	1060.485932	944.4714509	33408.64784	473.7862291	6708.523771	864.8839397	1657.336639	181.0117924	296.9741799
69.51760925	1060.631968	944.1973229	33425.5523	473.847114	6709.414082	864.9949685	1658.476063	181.0394429	297.0015861
69.58447157	1060.765872	943.8856288	33440.9073	473.9027056	6710.22436	865.0963064	1659.511518	181.0631933	297.0251266
69.63856461	1060.85713	944.4791211	33453.30802	473.9437279	6710.857632	865.1715997	1660.34828	181.1007881	297.0623892
69.68880823	1060.94478	944.8813785	33464.81527	473.9824752	6711.44899	865.2426185	1661.124989	181.1324396	297.093761
69.74743804	1061.053727	945.0119652	33478.23104	474.0291998	6712.146885	865.3280375	1662.03077	181.1619685	297.123029
69.81856183	1061.190561	944.9284852	33494.48621	474.0869214	6712.998533	865.433408	1663.128677	181.1924814	297.1532722
69.8909438	1061.337619	944.4442406	33511.00804	474.1474205	6713.874138	865.5436011	1664.245035	181.2147936	297.1753873
69.95075661	1061.44668	944.658317	33524.63779	474.1945176	6714.581149	865.6297526	1665.166523	181.2465672	297.2068801
70.00092072	1061.529333	945.2724881	33536.05274	474.2319686	6715.162413	865.6985362	1665.938652	181.282652	297.2426461
70.05395595	1061.624927	945.5069332	33548.11165	474.2734316	6715.786824	865.7744103	1666.754526	181.311745	297.271482
70.11941729	1061.747715	945.5495598	33562.98003	474.3256841	6716.562873	865.8698707	1667.76082	181.3422472	297.3017146
70.19389457	1061.894535	945.2328725	33579.87511	474.3867327	6717.453833	865.981172	1668.904731	181.3689525	297.3281839
70.24727523	1061.986707	945.6510807	33591.96375	474.4274587	6718.075223	866.0558147	1669.723706	181.4021082	297.3610467
70.3006559	1062.082415	945.8874521	33604.04074	474.468977	6718.700551	866.1317912	1670.542142	181.4312793	297.38996
70.36554026	1062.203421	945.9343535	33618.70467	474.5204893	6719.465831	866.2259022	1671.536224	181.4614681	297.419882
70.43904744	1062.34693	945.6574522	33635.29667	474.5802871	6720.339984	866.3349439	1672.661454	181.4884376	297.4466132
70.50590992	1062.478541	945.3431453	33650.36789	474.6348918	6721.13559	866.4344775	1673.684009	181.5115673	297.4695385
70.56000319	1062.56792	945.9358205	33662.53932	474.6751108	6721.756973	866.5083031	1674.510342	181.5486888	297.506332
70.61024701	1062.653831	946.3370956	33673.83381	474.7131136	6722.337305	866.5779617	1675.27737	181.5798963	297.5372637
70.66887697	1062.760761	946.4660165	33687.00157	474.7589729	6723.022362	866.6617993	1676.17186	181.6088963	297.5660074
70.74000087	1062.895159	946.3801479	33702.95628	474.8156478	6723.858464	866.7652566	1677.256079	181.6387602	297.5956075
70.812383	1063.039753	945.8928665	33719.17278	474.8750861	6724.718286	866.8735103	1678.35852	181.6603998	297.6170558
70.87219604	1063.146763	946.1053708	33732.55058	474.9213035	6725.41225	866.9580542	1679.268516	181.6916386	297.6480186
70.92236032	1063.227684	946.7188938	33743.75444	474.9580144	6725.982566	867.0254858	1680.031013	181.72729	297.683355
70.97539568	1063.32146	946.9520209	33755.59041	474.9986987	6726.59543	867.0999367	1680.836708	181.7559115	297.7117235
71.04085714	1063.442016	946.9926453	33770.18394	475.0499929	6727.357252	867.1936456	1681.830447	181.785824	297.7413717
71.11533458	1063.586311	946.6731294	33786.76677	475.1099553	6728.232064	867.3029613	1682.960085	181.8118474	297.7671652
71.16871546	1063.676657	947.0902899	33798.63191	475.1498993	6728.841871	867.3761752	1683.76884	181.8445363	297.7995652
71.22209634	1063.770545	947.3253409	33810.48564	475.1906379	6729.455635	867.4507266	1684.577061	181.8732352	297.8280105
71.28698085	1063.88935	947.3702747	33824.87851	475.241205	6730.206883	867.5431102	1685.558733	181.9028426	297.8573563
71.36048811	1064.030378	947.0906514	33841.16384	475.2999357	6731.065174	867.6502013	1686.669914	181.9291436	297.8834249
71.42735074	1064.159736	946.7737798	33855.95652	475.3535717	6731.846374	867.747964	1687.679701	181.9516641	297.9057464
71.48144423	1064.247271	947.365653	33867.90289	475.3930021	6732.456086	867.8203489	1688.495713	181.9883211	297.9420794
71.53168825	1064.331474	947.7659637	33878.98856	475.4302742	6733.025595	867.8886724	1689.25316	182.0190927	297.9725791
71.59031836	1064.436424	947.8932496	33891.91291	475.4752841	6733.698047	867.9709577	1690.136476	182.0475735	298.0008083
71.66144236	1064.568431	947.8050364	33907.5727	475.5309316	6734.518886	868.072537	1691.207147	182.0768006	298.0297771
71.73382466	1064.710607	947.3147741	33923.48952	475.5893286	6735.363214	868.1788871	1692.295814	182.0977799	298.050571
71.79363791	1064.815603	947.5257352	33936.62002	475.6346826	6736.044369	868.261853	1693.194437	182.1284938	298.0810135
71.84380237	1064.894823	948.1386222	33947.61671	475.6706671	6736.603938	868.3279574	1693.947401	182.1637198	298.1159282
71.89683786	1064.986816	948.3704555	33959.23386	475.7105869	6737.205466	868.4010115	1694.743023	182.1918783	298.1438379
71.96229943	1065.105181	948.4091146	33973.55762	475.7609405	6737.953322	868.4930011	1695.724337	182.2212122	298.1729125
72.03677703	1065.246997	948.0868222	33989.83397	475.8198367	6738.81228	868.6003679	1696.839849	182.2465663	298.1980426
72.09015812	1065.335549	948.5029542	34001.47975	475.8590132	6739.410715	868.6721793	1697.638488	182.278797	298.2299885
72.14353921	1065.427652	948.7367092	34013.11436	475.8989863	6740.013127	868.7453318	1698.4366	182.3070323	298.2579743
72.20842386	1065.544295	948.7797118	34027.24117	475.9486256	6740.7506	868.8360198	1699.405991	182.3360691	298.2867546
72.2819312	1065.682887	948.4974165	34043.2255	476.006309	6741.593318	868.9411962	1700.503268	182.3617139	298.3121728
72.34879398	1065.810035	948.1780276	34057.7448	476.0589941	6742.360376	869.0372207	1701.500419	182.3836365	298.3339016
72.40288769	1065.895758	948.7691133	34069.47028	476.0976504	6742.958631	869.1081913	1702.306217	182.4198375	298.3697827
72.4531319	1065.978286	949.1684776	34080.35099	476.1342054	6743.517513	869.1752044	1703.054181	182.4501814	298.3998584
72.51176215	1066.081292	949.2941586	34093.03642	476.1783815	6744.177591	869.2559659	1703.926438	182.4781526	298.4275825
72.58288625	1066.210951	949.2036439	34108.40676	476.2330205	6744.983447	869.3557019	1704.983703	182.5067544	298.4559316
72.65526872	1066.350753	948.7104557	34124.02945	476.2903955	6745.812564	869.4601835	1706.058738	182.5270857	298.4760832
72.71508219	1066.453771	948.9199021	34136.91722	476.3349018	6746.481144	869.5416004	1706.946106	182.5572844	298.506015
72.76524681	1066.531322	949.5321647	34147.71056	476.3701733	6747.030161	869.6064021	1707.689636	182.5920928	298.5405159
72.81828243	1066.621565	949.7627279	34159.11294	476.4093428	6747.620561	869.6780851	1708.475289	182.619797	298.5679753
72.88374411	1066.737778	949.799458	34173.17193	476.4587731	6748.354706	869.7683872	1709.444306	182.6485628	298.5964868
72.95822187	1066.87716	949.4744402	34189.14747	476.5166228	6749.1981	869.8738409	1710.54584	182.6732599	298.6209657
73.01160317	1066.963952	949.8895628	34200.57794	476.5550459	6749.785371	869.9442757	1711.334468	182.7050409	298.6524659
73.06498447	1067.054301	950.1220456	34211.99748	476.5942676	6750.376638	870.0160551	1712.122575	182.7328212	298.6800007
73.12986926	1067.168822	950.1631525	34225.86316	476.6429963	6751.100588	870.1050787	1713.079812	182.761298	298.7082259
73.20337666	1067.305023	949.8782346	34241.55205	476.6996516	6751.928018	870.2083758	1714.16333	182.7862987	298.7330057
73.27023959	1067.430001	949.5563746	34255.80302	476.7514033	6752.681193	870.3026941	1715.147977	182.8076344	298.7541528
73.32433352	1067.513947	950.1466875	34267.3117	476.7892998	6753.268199	870.3722765	1715.943666	182.8433879	298.7895903
73.37457792	1067.594829	950.5451226	34277.99125	476.8251508	6753.81665	870.4380033	1716.682247	182.8733118	298.8192498
73.43320831	1067.695927	950.6692283	34290.44218	476.8685086	6754.464579	870.5172691	1717.54356	182.9007828	298.8464781
73.50433251	1067.82328	950.5764546	34305.52841	476.9221577	6755.255726	870.6151957	1718.587558	182.9287711	298.874219
73.57671514	1067.960752	950.0803944	34320.8624	476.9785294	6756.06991	870.7178432	1719.649103	182.9484662	298.8937401
73.63652882	1068.061829	950.2883539	34333.51195	477.0222038	6756.726145	870.7977397	1720.525333	182.9781592	298.9231708
73.68669361	1068.137742	950.9000036	34344.1057	477.0567753	6757.264804	870.8612627	1721.259527	183.0125578	298.9572653
73.73972935	1068.226265	951.1293203	34355.29728	477.0952085	6757.844278	870.9315999	1722.035315	183.039816	298.9842827
73.80519115	1068.340366	951.1641568	34369.09639	477.1437324	6758.564962	871.0202455	1722.992164	183.0680242	299.0122417
73.87966905	1068.47736	950.8364639	34384.77669	477.2005549	6759.393078	871.1238214	1724.079865	183.0920765	299.0360814
73.93305056	1068.562423	951.2505956	34395.99583	477.2382384	6759.969389	871.192905	1724.858587	183.1234161	299.067144
73.98643206	1068.651051	951.4818296	34407.20427	477.2767226	6760.549714	871.2633366	1725.636794	183.1507498	299.0942362
74.05131699	1068.763488	951.5210758	34420.81365	477.3245575	6761.260388	871.3507264	1726.582004	183.1786768	299.1219165
74.12482447	1068.897342	951.2335835	34436.21258	477.3802036	6762.07281	871.4521788	1727.651906	183.2030454	299.1460697
74.19168754	1069.02019	950.909298	34450.20019	477.4310392	6762.812355	871.5448223	1728.624179	183.223805	299.1666459
74.24578167	1069.10239	951.4988523	34461.49606	477.4681899	6763.388318	871.6130423	1729.409866	183.2591191	299.2016479
74.29602626	1069.181657	951.8963754	34471.97817	477.5033499	6763.926528	871.6775064	1730.139162	183.2886309	299.230899
74.35465679	1069.280881	952.0189347	34484.19894	477.5459044	6764.562532	871.7553041	1730.989645	183.315611	299.2576406
74.42578109	1069.405972	951.9239437	34499.00632	477.5985818	6765.339238	871.8514547	1732.020514	183.3429969	299.2847845
74.49816388	1069.541156	951.4250644	34514.05696	477.6539688	6766.138763	871.9523019	1733.06871	183.3620676	299.3036867
74.55797776	1069.640328	951.6315645	34526.47267	477.6968265	6766.782878	872.030706	1733.933919	183.3912643	299.3326254
74.60814272	1069.714631	952.2426125	34536.87053	477.7307111	6767.311368	872.0929739	1734.658875	183.4252606	299.3663213
74.66117858	1069.801467	952.4707056	34547.85522	477.7684213	6767.880117	872.16199	1735.424902	183.4520811	299.3929048
74.72664049	1069.913495	952.5036834	34561.39925	477.8160556	6768.587586	872.2490097	1736.369709	183.4797421	299.4203213
74.80111854	1070.048144	952.1733648	34576.78977	477.8718698	6769.400702	872.3507424	1737.443723	183.5031614	299.4435337
74.85450025	1070.13151	952.5865237	34587.80149	477.9088275	6769.966254	872.4184996	1738.212642	183.5340677	299.4741669
74.90788195	1070.218448	952.816532	34598.80274	477.9465877	6770.535837	872.4876083	1738.981052	183.560963	299.5008245
74.97276701	1070.32884	952.8539518	34612.16056	477.9935452	6771.233478	872.5733945	1739.914362	183.5883505	299.52797
75.04627456	1070.460389	952.5639326	34627.27488	478.0482007	6772.031166	872.6730362	1740.970791	183.6120985	299.5515082
75.11313777	1070.581146	952.2372663	34641.004	478.0981371	6772.757331	872.7640358	1741.930821	183.6322927	299.5715239
75.16723212	1070.661632	952.8260759	34652.09101	478.1345558	6773.322453	872.8309183	1742.70661	183.6671756	299.6060986
75.21747689	1070.739313	953.2227038	34662.37932	478.1690375	6773.850609	872.894143	1743.426718	183.6962829	299.6349487
75.27610755	1070.836699	953.3437453	34674.3742	478.2108034	6774.474905	872.9704997	1744.266485	183.7227811	299.6612127
75.34723195	1070.959569	953.2465777	34688.90788	478.2625272	6775.237435	873.064907	1745.284364	183.7495758	299.6877706
75.41961489	1071.092506	952.7449313	34703.68041	478.3169475	6776.022568	873.163987	1746.319352	183.7680337	299.7060654
75.47942898	1071.189807	952.9499988	34715.86662	478.3590037	6776.654786	873.2409262	1747.173655	183.7967432	299.7345212
75.5295941	1071.262531	953.5604563	34726.0722	478.3922139	6777.173292	873.3019622	1747.88947	183.8303445	299.7678256
75.58263008	1071.347711	953.7873482	34736.85382	478.4292145	6777.731512	873.3696816	1748.645838	183.8567354	299.7939833
75.64809209	1071.457703	953.8185017	34750.1475	478.4759756	6778.426009	873.4551053	1749.578732	183.8838592	299.8208674
75.72257029	1071.59005	953.4856056	34765.25359	478.5308001	6779.224398	873.5550288	1750.639201	183.9066573	299.8434641
75.77595219	1071.67175	953.8978099	34776.06173	478.5670453	6779.779388	873.6214841	1751.398422	183.9371382	299.8736757
75.82933409	1071.757029	954.1266149	34786.85962	478.604095	6780.338426	873.6892942	1752.157139	183.9636033	299.8999069
75.89421928	1071.865414	954.1622419	34799.97053	478.6501912	6781.023272	873.7735063	1753.078673	183.9904612	299.9265274
75.96772691	1071.994701	953.8697424	34814.80552	478.7038745	6781.806495	873.8713707	1754.121772	184.0136002	299.949462
76.03459026	1072.113404	953.5407392	34828.28092	478.7529281	6782.519525	873.9607567	1755.069687	184.0332393	299.9689275
76.0886848	1072.192209	954.1288178	34839.16293	478.7886283	6783.074005	874.0263264	1755.835683	184.067699	300.0030827
76.13892976	1072.268333	954.524567	34849.26103	478.8224442	6783.592291	874.0883346	1756.5467	184.0964092	300.0315392
76.19756055	1072.363913	954.6441186	34861.03418	478.8634362	6784.205093	874.1632768	1757.375865	184.1224344	300.0573344
76.26868504	1072.484602	954.5448146	34875.29924	478.9142237	6784.953706	874.255973	1758.380891	184.1486488	300.0833172
76.34106814	1072.615335	954.0404521	34889.7988	478.9676952	6785.72471	874.3533184	1759.40281	184.1665052	300.1010158
76.40088243	1072.710799	954.2441135	34901.75975	479.0089646	6786.345248	874.4288198	1760.246323	184.1947364	300.1289976
76.4510477	1072.781973	954.8539912	34911.77661	479.0415129	6786.853954	874.4886464	1760.953094	184.2279502	300.1619178
76.50408379	1072.865526	955.0797042	34922.35891	479.0778171	6787.401836	874.5550931	1761.699905	184.2539194	300.1876575
76.56954592	1072.97352	955.1090669	34935.40687	479.1237211	6788.083598	874.6389502	1762.62101	184.2805159	300.2140191
76.64402426	1073.103606	954.7736409	34950.2338	479.1775741	6788.867532	874.7370978	1763.66808	184.3027042	300.2360113
76.69740635	1073.183671	955.1849079	34960.84212	479.2131199	6789.412151	874.8022751	1764.417704	184.3327677	300.2658091
76.75078845	1073.267322	955.4125319	34971.44041	479.249472	6789.960838	874.8688106	1765.16683	184.3588105	300.2916218
76.81567377	1073.373736	955.4463992	34984.30898	479.2947229	6790.633123	874.9514777	1766.076714	184.3851484	300.317727
76.88918146	1073.500802	955.1514651	34998.8698	479.3474518	6791.402146	875.0475976	1767.106624	184.4076897	300.340069
76.95604495	1073.61749	954.8201681	35012.09618	479.395639	6792.102281	875.1353997	1768.042553	184.426784	300.3589947
77.01013969	1073.694643	955.4075292	35022.77698	479.4306339	6792.646312	875.1996808	1768.798859	184.4608283	300.3927381
77.06038482	1073.769239	955.8024157	35032.68839	479.4637963	6793.154909	875.2604948	1769.500881	184.4891487	300.4208083
77.11901575	1073.863047	955.920505	35044.24392	479.5040286	6793.756428	875.3340487	1770.319556	184.5147096	300.4461433
77.19014033	1073.981595	955.8191039	35058.24532	479.5538972	6794.491378	875.4250652	1771.311866	184.5403545	300.4715616
77.26252358	1074.110163	955.3120754	35072.47695	479.6064375	6795.248512	875.5207081	1772.320855	184.5576204	300.4886749
77.32233806	1074.203825	955.5143564	35084.21681	479.6469345	6795.857583	875.594798	1773.153692	184.5853823	300.5161915
77.37250349	1074.273476	956.1236652	35094.04844	479.6788331	6796.356668	875.6534377	1773.851515	184.6182156	300.5487346
77.4255397	1074.355433	956.3482209	35104.43512	479.7144536	6796.894403	875.718635	1774.588871	184.6437709	300.5740641
77.49100193	1074.461466	956.3758258	35117.24189	479.7595163	6797.563662	875.8009545	1775.498314	184.6698499	300.5999127
77.56548041	1074.589333	956.0379166	35131.79483	479.8124157	6798.333404	875.8973589	1776.532126	184.6914396	300.6213116
77.61886269	1074.667793	956.4482637	35142.20702	479.847275	6798.867844	875.9612819	1777.272255	184.7210934	300.6507034
77.67224497	1074.749844	956.6747284	35152.6094	479.8829426	6799.406368	876.0265662	1778.011893	184.7467216	300.6761051
77.73713042	1074.854324	956.7068683	35165.24011	479.9273637	6800.066322	876.1077167	1778.910251	184.7725494	300.7017046
77.81063818	1074.979209	956.4095445	35179.53183	479.9791558	6800.821405	876.2021242	1779.927112	184.7945038	300.7234651
77.87750181	1075.093919	956.075996	35192.5138	480.0264925	6801.508881	876.2883716	1780.851183	184.8130635	300.7418607
77.93159674	1075.169451	956.6626527	35202.99711	480.0607951	6802.042655	876.3513878	1781.597902	184.8467	300.7752
77.98184205	1075.242546	957.0566926	35212.72528	480.093316	6802.54174	876.4110298	1782.291026	184.8746379	300.802891
78.0404731	1075.334615	957.1733464	35224.06721	480.1328027	6803.132181	876.4832208	1783.099323	184.8997431	300.8277744
78.11159778	1075.451061	957.0698869	35237.80983	480.1817693	6803.85372	876.5725887	1784.079052	184.9248289	300.8526385
78.18398117	1075.577504	956.5602415	35251.7785	480.2333954	6804.597237	876.6665603	1785.075249	184.9415152	300.8691774
78.24379584	1075.669396	956.7611677	35263.30135	480.2731344	6805.195052	876.7392649	1785.897524	184.9688164	300.8962373
78.29396143	1075.737553	957.3699178	35272.95118	480.3043952	6805.684691	876.7967394	1786.586495	185.0012763	300.9284104
78.34699774	1075.817943	957.5933376	35283.14584	480.3393447	6806.212464	876.8607104	1787.314497	185.0264252	300.9533371
78.41246008	1075.92205	957.6192172	35295.7159	480.3835816	6806.86945	876.9415206	1788.212401	185.0519963	300.9786822
78.4869387	1076.047739	957.2788704	35309.9999	480.435545	6807.62526	877.036214	1789.233097	185.0729986	300.9994989
78.54032116	1076.124623	957.6883145	35320.2196	480.4697305	6808.149706	877.0989057	1789.963834	185.1022502	301.028492
78.59370363	1076.205105	957.9136413	35330.42969	480.504726	6808.678253	877.162962	1790.694085	185.1274715	301.0534905
78.6585892	1076.307685	957.9440858	35342.82695	480.5483326	6809.326102	877.2426239	1791.581039	185.1527984	301.0785935
78.73209703	1076.43043	957.6444163	35356.85454	480.5992053	6810.0675	877.3353505	1792.584991	185.1741769	301.0997831
78.79896079	1076.543197	957.3086577	35369.59662	480.6457072	6810.742548	877.4200719	1793.49733	185.1922117	301.1176586
78.85305592	1076.617138	957.8946231	35379.8861	480.6793303	6811.266253	877.4818466	1794.234566	185.225448	301.1506011
78.90330139	1076.688761	958.2878319	35389.43441	480.7112215	6811.756	877.540338	1794.918887	185.2530104	301.17792
78.96193257	1076.779121	958.4030766	35400.56669	480.7499762	6812.335567	877.6111914	1795.716917	185.2776683	301.20236
79.03305734	1076.893504	958.2975968	35414.05531	480.7980575	6813.043938	877.6989411	1796.684199	185.3022053	301.2266802
79.10544087	1077.017861	957.7853827	35427.76588	480.8487863	6813.774089	877.7912723	1797.667742	185.3183229	301.2426553
79.16525573	1077.108016	957.984979	35439.07574	480.8877812	6814.360852	877.862617	1798.479569	185.3451718	301.269267
79.21542147	1077.174706	958.5931808	35448.54713	480.9184161	6814.84122	877.9189478	1799.159781	185.3772651	301.3010768
79.26845789	1077.253557	958.8154856	35458.55333	480.9527069	6815.359213	877.9817151	1799.87853	185.4020153	301.3256083
79.33392033	1077.355774	958.8396716	35470.89105	480.9961332	6816.00415	878.0610438	1800.76502	185.4270878	301.3504592
79.40839909	1077.479325	958.4969323	35484.91109	481.0471778	6816.746283	878.1540577	1801.772741	185.4475134	301.3707043
79.46178173	1077.554661	958.90549	35494.94185	481.0807019	6817.260919	878.2155409	1802.494185	185.4763702	301.3993061
79.51516438	1077.633602	959.1296998	35504.96321	481.1150378	6817.779671	878.2783917	1803.21515	185.5011922	301.4239088
79.58005008	1077.734318	959.1584801	35517.13133	481.1578449	6818.415636	878.3565924	1804.090823	185.5260275	301.4485246
79.65355797	1077.854962	958.8565081	35530.89969	481.207815	6819.1436	878.4476692	1805.082006	185.5468407	301.4691539
79.72042186	1077.965822	958.5185803	35543.40631	481.2534976	6819.806448	878.5308927	1805.982739	185.5643604	301.4865187
79.77451717	1078.038201	959.103867	35553.50553	481.2864536	6820.320268	878.5914487	1806.710594	185.5972038	301.5190719
79.82476281	1078.108378	959.49626	35562.87732	481.3177268	6820.800847	878.6488109	1807.386205	185.6243976	301.5460254
79.88339412	1078.197061	959.6101217	35573.80383	481.355763	6821.369739	878.7183512	1808.174079	185.6486165	301.5700303
79.95451897	1078.309419	959.5026586	35587.04315	481.4029753	6822.065185	878.8045124	1809.129049	185.6726149	301.5938167
80.02690265	1078.431728	958.9879232	35600.50039	481.4528234	6822.782213	878.8952335	1810.100074	185.6881741	301.6092384
80.0867177	1078.520177	959.1862141	35611.60119	481.4910879	6823.358128	878.9652434	1810.901565	185.7145792	301.6354101
80.13688358	1078.585428	959.7938778	35620.89744	481.5211083	6823.829392	879.0204517	1811.573114	185.7463127	301.6668633
80.18992011	1078.662768	960.0150881	35630.71867	481.5547525	6824.337785	879.0820375	1812.282708	185.7706715	301.6910068
80.25538264	1078.763129	960.0376117	35642.82835	481.5973832	6824.970894	879.159912	1813.157907	185.7952546	301.7153726
80.32986154	1078.884581	959.6925239	35656.58932	481.6475261	6825.6996	879.2512774	1814.152793	185.8151142	301.7350567
80.38324436	1078.958399	960.1002116	35666.43463	481.6804009	6826.204605	879.3115743	1814.865045	185.8435836	301.7632745
80.43662718	1079.035827	960.3233251	35676.27075	481.7140893	6826.713742	879.3732418	1815.576824	185.8680135	301.7874886
80.501513	1079.134712	960.3504718	35688.21396	481.7561117	6827.338041	879.4500083	1816.441339	185.8923663	301.8116262
80.57502096	1079.253294	960.0462398	35701.72788	481.805196	6828.052817	879.5394657	1817.419889	185.9126246	301.8317055
80.64188498	1079.362282	959.7061826	35714.0034	481.8500742	6828.703687	879.6212189	1818.309142	185.9296386	301.8485692
80.69598047	1079.433127	960.2908032	35723.91589	481.8823755	6829.207803	879.6805787	1819.027716	185.9620964	301.8807402
80.74622628	1079.501885	960.6823954	35733.11441	481.913042	6829.679383	879.7368324	1819.694714	185.9889285	301.9073351
80.8048577	1079.588922	960.7948996	35743.83896	481.9503731	6830.237796	879.8050838	1820.47254	186.0127164	301.9309128
80.87598265	1079.699292	960.6854899	35756.83359	481.9967324	6830.920552	879.889686	1821.415332	186.0361862	301.9541752
80.94836646	1079.81959	960.1682797	35770.04219	482.0457159	6831.624698	879.9788265	1822.373974	186.0511974	301.9690537
81.00818169	1079.906365	960.3652892	35780.9378	482.0832635	6832.189963	880.0475263	1823.16524	186.0771668	301.9947937
81.05834771	1079.970202	960.9724246	35790.06215	482.1126808	6832.652291	880.1016327	1823.82822	186.1085472	302.0258968
81.11138435	1080.04606	961.1925606	35799.70182	482.1456904	6833.151259	880.1620588	1824.528759	186.1325218	302.0496595
81.17684699	1080.144599	961.2134525	35811.58768	482.1875401	6833.772756	880.2385059	1825.39279	186.1566245	302.0735493
81.25132601	1080.26399	960.8660595	35825.09436	482.2367978	6834.488281	880.3282532	1826.374978	186.1759285	302.0926827
81.30470901	1080.336317	961.2728932	35834.75766	482.2690354	6834.983831	880.3873856	1827.078139	186.2040176	302.1205235
81.35809201	1080.412261	961.4949305	35844.41196	482.3020882	6835.48353	880.4478917	1827.780831	186.2280628	302.1443562
81.42297794	1080.509349	961.5204737	35856.13443	482.3433404	6836.096376	880.5232504	1828.634308	186.2519419	302.1680244
81.49648597	1080.625906	961.2140235	35869.39861	482.391555	6836.798205	880.6111183	1829.600363	186.2716556	302.1875639
81.56335011	1080.733056	960.8718762	35881.4473	482.4356438	6837.437318	880.6914283	1830.478261	186.2881733	302.2039356
81.61744578	1080.802396	961.4558429	35891.17651	482.4673024	6837.931907	880.7496139	1831.187655	186.3202526	302.2357315
81.66769175	1080.86976	961.8466491	35900.20497	482.4973735	6838.394653	880.8047795	1831.846131	186.3467296	302.2619745
81.72632329	1080.955181	961.9578207	35910.73129	482.5340124	6838.942777	880.8717659	1832.614021	186.3700946	302.285133
81.79744832	1081.0636	961.8465003	35923.48576	482.5795344	6839.613076	880.9548377	1833.544766	186.3930454	302.307881
81.86983227	1081.181924	961.3268608	35936.45031	482.6276693	6840.304576	881.0424269	1834.491159	186.4075187	302.3222264
81.92964768	1081.267056	961.5226127	35947.14453	482.6645132	6840.859386	881.1098406	1835.272312	186.4330604	302.3475424
81.97981384	1081.329505	962.1292294	35956.10015	482.6933385	6841.312942	881.1628655	1835.926815	186.4640942	302.378302
82.03285059	1081.403907	962.348311	35965.56163	482.7257252	6841.802658	881.2221531	1836.618398	186.4876917	302.4016909
82.09831331	1081.500658	962.3676012	35977.2278	482.7668083	6842.412756	881.2971992	1837.471381	186.5113229	302.4251134
82.17279247	1081.618026	962.0179456	35990.4849	482.8151972	6843.115341	881.3853582	1838.441012	186.5300817	302.4437064
82.22617564	1081.688889	962.423941	35999.96956	482.8468092	6843.60161	881.4433477	1839.135179	186.5577974	302.4711772
82.27955881	1081.763375	962.6449219	36009.4454	482.8792382	6844.092042	881.5027138	1839.828884	186.5814649	302.4946356
82.34444486	1081.8587	962.6688912	36020.95121	482.9197343	6844.693645	881.5766907	1840.671443	186.6048792	302.5178429
82.41795295	1081.973269	962.3602636	36033.97027	482.9670955	6845.382764	881.6629982	1841.625139	186.6240583	302.5368526
82.48481721	1082.078615	962.0160647	36045.79633	483.0104093	6846.010335	881.7418917	1842.491805	186.6400889	302.5527415
82.53891306	1082.146476	962.5993896	36055.34564	483.0414371	6846.495573	881.7989248	1843.19212	186.6717967	302.5841691
82.58915918	1082.212473	962.9894243	36064.2072	483.0709237	6846.949645	881.8530224	1843.842168	186.6979251	302.6100667
82.64779084	1082.296308	963.0992879	36074.53895	483.1068831	6847.48767	881.918767	1844.600228	186.7208749	302.6328136
82.71891596	1082.40281	962.9860919	36087.05769	483.1515833	6848.145741	882.0003366	1845.519058	186.7433165	302.6550569
82.79130004	1082.519198	962.4640681	36099.78271	483.1988853	6848.824826	882.0864031	1846.453336	186.7572617	302.6688789
82.85111562	1082.602715	962.6585853	36110.27926	483.2350385	6849.369372	882.1525545	1847.224487	186.7823837	302.6937789
82.90128193	1082.663802	963.264693	36119.06928	483.2632826	6849.814317	882.2045177	1847.870606	186.8130773	302.7242013
82.95431877	1082.736776	963.4827396	36128.35586	483.2950579	6850.294949	882.262688	1848.55333	186.8363046	302.7472233
83.0197816	1082.831771	963.5004577	36139.80641	483.3353886	6850.893857	882.3363589	1849.395387	186.8594731	302.7701871
83.09426087	1082.947153	963.1485811	36152.81854	483.3829246	6851.58374	882.4229588	1850.352597	186.8776966	302.7882495
83.14764421	1083.01658	963.5537536	36162.12785	483.4139227	6852.060896	882.4798264	1851.037868	186.9050459	302.8153572
83.20102755	1083.089635	963.7736976	36171.42854	483.4457393	6852.542232	882.5380735	1851.722684	186.9283427	302.8384481
83.26591371	1083.183227	963.7961221	36182.72169	483.4854933	6853.132798	882.610694	1852.554445	186.9513007	302.8612032
83.33942187	1083.295845	963.4853571	36195.50018	483.5320167	6853.809441	882.6954701	1853.495917	186.9699551	302.8796928
83.40628625	1083.399421	963.1391446	36207.10771	483.5745699	6854.42568	882.7729731	1854.351475	186.9855075	302.8951078
83.46038228	1083.465831	963.7218394	36216.48046	483.6049785	6854.901738	882.828875	1855.042809	187.0168507	302.926174
83.51062855	1083.530485	964.1111168	36225.17819	483.6338914	6855.347296	882.8819243	1855.684521	187.042637	302.9517325
83.56926032	1083.612763	964.2196965	36235.31897	483.6691839	6855.875406	882.94645	1856.432859	187.0651793	302.9740755
83.64038552	1083.717384	964.1046596	36247.60636	483.7130774	6856.521472	883.0265452	1857.339905	187.0871209	302.9958233
83.71276974	1083.831869	963.5802953	36260.09627	483.7595618	6857.18837	883.1111169	1858.262201	187.1005479	303.0091316
83.77258549	1083.913803	963.7736007	36270.39881	483.795037	6857.722841	883.1760293	1859.023458	187.1252579	303.0336233
83.82275193	1083.973553	964.3792088	36279.02629	483.8227108	6858.159331	883.2269505	1859.661285	187.1556176	303.0637147
83.87578888	1084.045124	964.5962394	36288.1412	483.8538859	6858.631047	883.284024	1860.335248	187.1784816	303.0863766
83.94125179	1084.138396	964.6124143	36299.38011	483.893478	6859.218969	883.356345	1861.166498	187.2011958	303.1088901
84.01573119	1084.251828	964.2583577	36312.15181	483.9401769	6859.896383	883.4414147	1862.111423	187.2188939	303.1264319
84.0691147	1084.319844	964.6627225	36321.28901	483.9705723	6860.364595	883.4971811	1862.787898	187.2458836	303.153183
84.1224982	1084.391494	964.8816487	36330.41779	484.0017879	6860.837001	883.5543298	1863.463921	187.2688166	303.1759134
84.18738448	1084.483387	964.9025568	36341.50222	484.0408135	6861.416732	883.6256189	1864.285002	187.2913267	303.1982245
84.26089269	1084.594089	964.589694	36354.04457	484.0865144	6862.081126	883.7088918	1865.214385	187.3094661	303.2162036
84.32775719	1084.695926	964.2415049	36365.43763	484.1283211	6862.686242	883.78503	1866.058956	187.3245491	303.2311534
84.38185339	1084.760913	964.8235812	36374.63707	484.158122	6863.153287	883.8398214	1866.741409	187.3555344	303.2618649
84.43209981	1084.824248	965.2121152	36383.174	484.1864717	6863.590487	883.8918417	1867.374876	187.3809849	303.2870905
84.4907317	1084.904998	965.3194348	36393.12735	484.2211095	6864.108864	883.9551711	1868.1136	187.4031272	303.3090372
84.56185698	1085.007773	965.2025908	36405.18765	484.2642112	6864.743145	884.0338189	1869.008991	187.4245781	303.3302985
84.63424133	1085.120391	964.6759292	36417.44682	484.3098932	6865.398079	884.1169236	1869.919436	187.4374964	303.3431027
84.69405725	1085.20077	964.8680452	36427.55892	484.3447028	6865.922659	884.1806197	1870.670909	187.4618021	303.3671935
84.74422382	1085.259206	965.4731628	36436.02686	484.3718167	6866.350851	884.2305181	1871.300536	187.491834	303.39696
84.79726086	1085.3294	965.6891961	36444.97329	484.4024028	6866.813813	884.2865151	1871.965834	187.5143413	303.4192685
84.86272387	1085.42098	965.7038564	36456.00448	484.4412699	6867.390952	884.3575111	1872.786396	187.5366097	303.4413401
84.93720339	1085.532499	965.3476599	36468.54018	484.4871471	6868.056123	884.4410787	1873.719172	187.5537922	303.4583708
84.99058706	1085.599131	965.7512319	36477.50847	484.516951	6868.515554	884.4957641	1874.386946	187.5804288	303.484772
85.04397072	1085.669402	965.9691591	36486.46851	484.5475766	6868.979194	884.5518348	1875.054274	187.6030047	303.5071484
85.10885711	1085.759626	965.9885787	36497.34807	484.5858872	6869.548289	884.6218171	1875.864793	187.6250752	303.5290238
85.18236538	1085.868448	965.6736567	36509.65865	484.630781	6870.200659	884.7036144	1876.78222	187.642709	303.5465019
85.24923	1085.968578	965.3235275	36520.84121	484.6718548	6870.794856	884.7784129	1877.615926	187.6573314	303.5609951
85.30332636	1086.032166	965.9049968	36529.87055	484.7010591	6871.253053	884.8321144	1878.289595	187.6879654	303.5913583
85.35357294	1086.094208	966.2928011	36538.24966	484.728856	6871.682048	884.8831247	1878.914909	187.7130863	303.6162573
85.41220493	1086.173457	966.3988837	36548.01904	484.7628513	6872.190871	884.9452798	1879.644124	187.734836	303.6378148
85.4833303	1086.274419	966.280266	36559.85646	484.8051758	6872.813583	885.022507	1880.527989	187.7558053	303.6585988
85.55571477	1086.385204	965.7513495	36571.88913	484.8500701	6873.456772	885.1041716	1881.426715	187.7682243	303.670908
85.61553085	1086.464057	965.9422979	36581.81433	484.8842265	6873.971643	885.1666739	1882.168512	187.792133	303.6946054
85.66569755	1086.521205	966.546934	36590.12569	484.9107909	6874.391687	885.2155683	1882.790028	187.8218432	303.7240531
85.7187347	1086.590047	966.7619885	36598.90673	484.9407986	6874.846057	885.2705086	1883.446757	187.8440005	303.7460146
85.78419779	1086.679966	966.775162	36609.73404	484.9789542	6875.412608	885.3402041	1884.25675	187.8658313	303.7676525
85.85867744	1086.789606	966.4168651	36622.03812	485.0240249	6876.065763	885.4222973	1885.177511	187.8825076	303.7841815
85.91206126	1086.854878	966.819659	36630.84061	485.0532481	6876.516574	885.4759218	1885.836681	187.9087978	303.8102393
85.96544508	1086.923796	967.0366055	36639.63503	485.0832947	6876.971608	885.5309342	1886.49541	187.931023	303.8322682
86.03033158	1087.012382	967.0545641	36650.31353	485.1209034	6877.530261	885.5996338	1887.295485	187.952662	303.853716
86.10383991	1087.119358	966.7376209	36662.39663	485.1650049	6878.170828	885.6799827	1888.201088	187.9697997	303.8707022
86.17070464	1087.217813	966.3855873	36673.37256	485.2053594	6878.754305	885.7534663	1889.024048	187.98397	303.8847472
86.22480117	1087.280029	966.9664607	36682.23496	485.2339781	6879.203817	885.806098	1889.689031	188.0142591	303.9147687
86.27504789	1087.3408	967.3535488	36690.45915	485.2612325	6879.624758	885.8561169	1890.306282	188.0390565	303.939347
86.33367999	1087.418576	967.4584171	36700.04796	485.2945971	6880.124201	885.9171192	1891.026094	188.0604209	303.9605226
86.40480544	1087.517759	967.3380585	36711.66662	485.3361587	6880.735557	885.9929521	1891.89856	188.0809174	303.980838
86.47719003	1087.626745	966.8069286	36723.477	485.3802798	6881.367216	886.0732031	1892.785697	188.0928463	303.9926615
86.53700628	1087.704099	966.996731	36733.21875	485.413795	6881.872554	886.1345337	1893.517925	188.1163654	304.0159728
86.58717311	1087.759981	967.6008945	36741.37641	485.4398199	6882.284601	886.1824426	1894.131422	188.1457598	304.0451074
86.64021034	1087.827497	967.8149882	36749.99514	485.4692601	6882.730535	886.2363457	1894.779677	188.1675736	304.0667284
86.70567353	1087.915786	967.8267023	36760.62234	485.5067173	6883.286695	886.3047646	1895.579217	188.1889748	304.0879405
86.78015329	1088.023582	967.4663438	36772.69908	485.5509963	6883.928053	886.3854107	1896.488097	188.2051543	304.1039771
86.83353727	1088.087519	967.8683738	36781.33883	485.5796495	6884.370401	886.4379937	1897.138758	188.2311044	304.1296978
86.88692124	1088.155108	968.0843578	36789.9707	485.6091277	6884.816987	886.4919673	1897.788984	188.2529856	304.1513857
86.95180785	1088.242086	968.1008823	36800.45184	485.6460475	6885.365391	886.5594079	1898.57873	188.274201	304.1724137
87.02531624	1088.347249	967.7819551	36812.31166	485.6893713	6885.99437	886.6383353	1899.472641	188.2908517	304.1889172
87.09218109	1088.44406	967.4280522	36823.0848	485.7290198	6886.567324	886.7105281	1900.284975	188.3045781	304.2025223
87.14627777	1088.504928	968.0083408	36831.78333	485.7570637	6887.00831	886.7621096	1900.941369	188.3345288	304.2322083
87.19652463	1088.564453	968.3947258	36839.85549	485.7837856	6887.421344	886.8111554	1901.550646	188.3590087	304.2564719
87.25515684	1088.640782	968.4984024	36849.26707	485.8165311	6887.911579	886.8710264	1902.26116	188.3799948	304.2772726
87.32628236	1088.738219	968.3763348	36860.67102	485.8573439	6888.511786	886.9454905	1903.122355	188.4000273	304.297128
87.39866708	1088.845438	967.8430324	36872.2632	485.900706	6889.132127	887.0243541	1903.998032	188.4114752	304.3084748
87.45848348	1088.921321	968.0317098	36881.82489	485.9335919	6889.628108	887.0845345	1904.720797	188.4346119	304.331407
87.50865044	1088.975962	968.6354095	36889.83171	485.9590873	6890.032303	887.1314761	1905.326363	188.4636963	304.3602344
87.56168777	1089.042175	968.84856	36898.29112	485.9879705	6890.469958	887.1843611	1905.966238	188.4851728	304.3815212
87.62715104	1089.128863	968.8588417	36908.72191	486.024742	6891.015915	887.251527	1906.755443	188.5061524	304.4023154
87.70163092	1089.234849	968.4964596	36920.57551	486.068244	6891.645692	887.3307526	1907.652574	188.5218443	304.4178686
87.75501505	1089.297477	968.8977397	36929.05554	486.0963377	6892.079734	887.3823134	1908.294821	188.5474606	304.4432585
87.80839918	1089.363761	969.1127789	36937.52786	486.125258	6892.518027	887.4352674	1908.936639	188.569004	304.4646116
87.87328588	1089.44916	969.1278958	36947.81529	486.1615017	6893.056368	887.5014721	1909.716171	188.5898038	304.4852276
87.94679434	1089.552545	968.8070213	36959.45597	486.2040621	6893.673972	887.5790041	1910.59852	188.6059764	304.5012573
88.01365929	1089.647741	968.4512836	36970.03006	486.2430175	6894.236597	887.64993	1911.400348	188.6192672	304.5144306
88.06775613	1089.707287	969.030998	36978.56776	486.2704973	6894.669213	887.7004808	1912.048248	188.6488857	304.5437874
88.11800314	1089.765587	969.4166929	36986.49068	486.2966964	6895.074484	887.7485714	1912.649641	188.6730539	304.567742
88.17663545	1089.840497	969.5191997	36995.72831	486.3288342	6895.555681	887.8073318	1913.35096	188.6936688	304.5881747
88.24776105	1089.936219	969.3954548	37006.92151	486.368912	6896.144943	887.8804525	1914.20101	188.7132458	304.6075788
88.32014589	1090.041704	968.8600198	37018.29954	486.4115292	6896.754174	887.9579542	1915.065354	188.7242216	304.6184575
88.37996245	1090.116144	969.0475931	37027.6845	486.4437973	6897.240969	888.0170057	1915.778764	188.7469828	304.6410177
88.43012952	1090.169565	969.6508375	37035.54326	486.4687731	6897.637457	888.0629978	1916.376487	188.7757631	304.6695436
88.48316695	1090.234499	969.8630622	37043.8463	486.4971094	6898.066982	888.1148835	1917.008077	188.7969086	304.6905023
88.5486303	1090.319617	969.8719378	37054.08432	486.533208	6898.602924	888.1808194	1917.787062	188.8174744	304.7108863
88.62311029	1090.423825	969.5075694	37065.7189	486.5759472	6899.221333	888.2586507	1918.672576	188.8326876	304.7259652
88.67649457	1090.485167	969.9081136	37074.04216	486.6034919	6899.64722	888.3092082	1919.306503	188.8579762	304.7510303
88.72987885	1090.55017	970.1222254	37082.35788	486.6318645	6900.077372	888.3611614	1919.940007	188.8791882	304.7720548
88.79476566	1090.63402	970.1359606	37092.45519	486.6674444	6900.605835	888.426153	1920.709439	188.8995799	304.7922663
88.86827417	1090.735659	969.8131746	37103.88078	486.7092556	6901.212273	888.5023153	1921.580357	188.9152833	304.807831
88.93513923	1090.82927	969.455636	37114.25951	486.7475307	6901.764757	888.5719978	1922.371795	188.9281465	304.8205805
88.98923623	1090.887517	970.0347868	37122.63934	486.7744567	6902.189157	888.6215368	1923.011296	188.9574389	304.849614
89.03948337	1090.944616	970.4198044	37130.41578	486.8001427	6902.586808	888.6686898	1923.604894	188.9813012	304.8732655
89.09811579	1091.018132	970.5211629	37139.48268	486.8316841	6903.059132	888.7263601	1924.297121	189.0015516	304.893337
89.16924146	1091.112171	970.3957715	37150.46903	486.8710404	6903.637651	888.7981621	1925.136151	189.0206816	304.9122979
89.24162641	1091.215954	969.8582434	37161.63687	486.9129265	6904.235974	888.8743271	1925.98929	189.031194	304.9227174
89.30144312	1091.288976	970.0447328	37170.84837	486.9445882	6904.713752	888.9322704	1926.693448	189.0535868	304.9449123
89.35161033	1091.341201	970.6475302	37178.5618	486.9690538	6905.102674	888.9773305	1927.283418	189.0820684	304.9731423
89.40464784	1091.40488	970.8588463	37186.71136	486.9968534	6905.524219	889.0282353	1927.906814	189.1028891	304.9937789
89.47011128	1091.488455	970.8663418	37196.76017	487.0322915	6906.05033	889.092964	1928.675694	189.1230486	305.0137603
89.54459138	1091.590919	970.5000237	37208.17979	487.074282	6906.657579	889.1694267	1929.549721	189.1377921	305.0283736
89.5979758	1091.650998	970.8998455	37216.34918	487.1012877	6907.075461	889.2189993	1930.175422	189.1627591	305.0531199
89.65136023	1091.714745	971.113047	37224.51119	487.1291227	6907.497621	889.2699702	1930.800705	189.1836457	305.0738219
89.71624714	1091.797073	971.1254259	37234.42189	487.1640512	6908.016388	889.3337712	1931.560152	189.2036369	305.0936365
89.7897557	1091.896997	970.8007637	37245.63637	487.2051269	6908.611864	889.4085891	1932.419766	189.2188798	305.1087447
89.85662087	1091.989053	970.4414574	37255.82334	487.2427343	6909.154393	889.4770509	1933.200933	189.2313233	305.1210782
89.91071802	1092.046025	971.020055	37264.04823	487.2691168	6909.570727	889.5255968	1933.83213	189.2602956	305.1497945
89.9609653	1092.101944	971.4044077	37271.68091	487.2942991	6909.960898	889.5718295	1934.418019	189.2838576	305.1731484
90.01959781	1092.174093	971.5046391	37280.58023	487.325255	6910.424512	889.6284299	1935.101258	189.3037504	305.1928653
90.09072356	1092.266479	971.3776316	37291.36356	487.3639032	6910.992483	889.6989375	1935.929391	189.3224416	305.2113913
90.16310863	1092.368592	970.8380489	37302.32509	487.4050715	6911.5801	889.7737904	1936.771452	189.332499	305.2213599
90.22292549	1092.440222	971.0234746	37311.36633	487.4361381	6912.049026	889.8306459	1937.466462	189.3545303	305.2431965
90.27309281	1092.491272	971.6258332	37318.93713	487.460103	6912.43052	889.8747913	1938.048765	189.3827188	305.2711359
90.32613041	1092.553719	971.8362574	37326.93606	487.4873757	6912.844232	889.9247333	1938.664061	189.4032205	305.2914565
90.39159393	1092.63578	971.8423982	37336.79915	487.5221654	6913.360692	889.988277	1939.42295	189.4229814	305.3110427
90.46607415	1092.736531	971.4741664	37348.00779	487.5634211	6913.956986	890.0633964	1940.28562	189.4372638	305.3251989
90.51945871	1092.795371	971.873279	37356.02614	487.5898977	6914.367009	890.1120023	1940.903187	189.461915	305.3496323
90.57284328	1092.857884	972.085587	37364.03729	487.6172051	6914.781323	890.1620089	1941.520343	189.4824822	305.3700178
90.63773029	1092.938719	972.0966347	37373.76483	487.6514942	6915.290572	890.2246411	1942.269917	189.5020804	305.3894427
90.71123891	1093.03696	971.7701309	37384.7721	487.691848	6915.875288	890.2981395	1943.118355	189.5168712	305.4041029
90.77810419	1093.127489	971.4090894	37394.77087	487.7288	6916.408044	890.3654031	1943.889365	189.5289028	305.4160281
90.83220148	1093.18321	971.9871441	37402.84368	487.7546489	6916.81646	890.4129743	1944.512352	189.5575609	305.444433
90.88244889	1093.237971	972.3708441	37410.33525	487.7793369	6917.199288	890.4583037	1945.09062	189.5808282	305.4674947
90.9410815	1093.308777	972.4699692	37419.07009	487.8097181	6917.654351	890.5138538	1945.764971	189.6003699	305.4868637
91.01220732	1093.399541	972.3413754	37429.65416	487.8476713	6918.21197	890.583091	1946.582331	189.6186304	305.5049628
91.08459251	1093.500013	971.7997761	37440.41319	487.8881351	6918.789075	890.6566559	1947.413439	189.6282414	305.5144889
91.14440952	1093.570278	971.9841575	37449.28733	487.9186174	6919.249312	890.7124438	1948.099406	189.6499176	305.5359736
91.19457695	1093.620174	972.5860855	37456.71813	487.9420909	6919.623515	890.7556913	1948.674129	189.6778184	305.5636279
91.24761464	1093.681411	972.7956342	37464.56919	487.9688464	6920.029537	890.8046882	1949.281416	189.6980072	305.5836382
91.31307824	1093.761986	972.8004453	37474.25001	488.0029998	6920.536523	890.8670688	1950.030426	189.7173767	305.6028366
91.38755856	1093.861056	972.430335	37485.25156	488.0435341	6921.122063	890.9408696	1950.881868	189.7312065	305.6165442
91.44094327	1093.91868	972.8287516	37493.12168	488.0694914	6921.524371	890.9885266	1951.491394	189.7555479	305.6406705
91.49432798	1093.979981	973.0401826	37500.98476	488.096281	6921.930984	891.0375868	1952.100513	189.7758016	305.6607452
91.55921508	1094.05935	973.0499236	37510.53252	488.1299423	6922.430888	891.0990718	1952.840326	189.7950139	305.6797877
91.63272376	1094.15594	972.7216122	37521.33641	488.1695876	6923.005041	891.1712749	1953.677715	189.8093611	305.6940081
91.69958914	1094.244969	972.3588675	37531.15046	488.2058963	6923.528205	891.2373626	1954.438684	189.8209883	305.7055326
91.75368658	1094.299462	972.9363892	37539.074	488.2312215	6923.928848	891.2839769	1955.053554	189.8493381	305.7336319
91.80393412	1094.353087	973.3194486	37546.42707	488.2554242	6924.304468	891.3284197	1955.624287	189.8723161	305.7564068
91.86256683	1094.422574	973.4174878	37555.00048	488.2852414	6924.751137	891.3829389	1956.289852	189.8915131	305.7754343
91.93369272	1094.511746	973.287337	37565.38896	488.3225122	6925.298592	891.450929	1957.096561	189.9093509	305.7931144
92.00607802	1094.610608	972.7437582	37575.94924	488.3622846	6925.865379	891.5232298	1957.916839	189.9185236	305.8022061
92.06589517	1094.679532	972.9271145	37584.65936	488.3921935	6926.317086	891.5779697	1958.593865	189.9398515	305.8233455
92.11606272	1094.728296	973.5286199	37591.95275	488.4151845	6926.684132	891.6203358	1959.161094	189.9674699	305.8507198
92.16910049	1094.788346	973.7373093	37599.65869	488.4414324	6927.082605	891.6684052	1959.760464	189.9873514	305.8704257
92.23456417	1094.867462	973.7408152	37609.1606	488.4749612	6927.58029	891.7296441	1960.499708	190.0063369	305.8892433
92.30904459	1094.964881	973.3688611	37619.95889	488.5147875	6928.155273	891.8021506	1961.340049	190.0197224	305.9025106
92.36242944	1095.021311	973.7665945	37627.68352	488.5402351	6928.550009	891.8488762	1961.941625	190.0437597	305.9263354
92.41581429	1095.081423	973.9771645	37635.40126	488.5665162	6928.949061	891.8970074	1962.542799	190.0637057	305.9461052
92.48070149	1095.159353	973.985623	37644.77258	488.5995615	6929.439792	891.9573664	1963.272962	190.0825392	305.9647723
92.55421022	1095.254321	973.6555372	37655.37685	488.6385113	6930.003576	892.0282981	1964.099428	190.0964509	305.9785611
92.6210757	1095.341879	973.2911208	37665.00959	488.6741885	6930.517323	892.0932314	1964.85047	190.1076812	305.9896922
92.67517328	1095.395166	973.8681194	37672.78662	488.6989997	6930.910336	892.1389066	1965.457314	190.1357284	306.0174914
92.72542095	1095.447675	974.25055	37680.00376	488.7227261	6931.278879	892.182479	1966.020599	190.1584224	306.039985
92.78405375	1095.515868	974.3475233	37688.41871	488.7519896	6931.717308	892.2359864	1966.677477	190.1772813	306.0586771
92.85517971	1095.603477	974.2158441	37698.61522	488.7885908	6932.254787	892.3027525	1967.473656	190.1947041	306.075946
92.92756512	1095.700759	973.6703223	37708.98043	488.8276844	6932.811446	892.3738124	1968.283229	190.2034466	306.0846113
92.98738241	1095.768366	973.8526726	37717.52956	488.8570304	6933.254778	892.4275237	1968.951415	190.2244326	306.1054118
93.03755007	1095.816019	974.453763	37724.68809	488.8795479	6933.614798	892.4690247	1969.511236	190.2517738	306.1325114
93.09058793	1095.874903	974.6616089	37732.25159	488.9052976	6934.005861	892.5161835	1970.102778	190.2713538	306.1519184
93.15605169	1095.952587	974.6638337	37741.5779	488.9382132	6934.494417	892.5763018	1970.832368	190.2899622	306.1703623
93.23053222	1096.048386	974.2900698	37752.17669	488.9773446	6935.059036	892.647538	1971.661734	190.3029116	306.1831974
93.2839172	1096.103644	974.6871326	37759.75851	489.0022918	6935.446337	892.6933493	1972.255451	190.3266504	306.2067264
93.33730218	1096.162589	974.8968576	37767.33361	489.028074	6935.837968	892.7405687	1972.848771	190.3462944	306.2261968
93.40218948	1096.239106	974.9040571	37776.53174	489.0605146	6936.319695	892.7998225	1973.569394	190.3647562	306.2444955
93.47569826	1096.332482	974.5722298	37786.94009	489.0987816	6936.873299	892.8695062	1974.385061	190.3782404	306.2578605
93.54256384	1096.418596	974.2061725	37796.39486	489.1338391	6937.377802	892.9333065	1975.12629	190.3890812	306.2686055
93.59666156	1096.470699	974.7826575	37804.02809	489.1581457	6937.763325	892.9780598	1975.725201	190.4168312	306.2961103
93.64690935	1096.522112	975.1644709	37811.11181	489.1814046	6938.124922	893.020778	1976.281121	190.4392466	306.3183276
93.70554225	1096.589035	975.2603979	37819.37124	489.2101247	6938.555262	893.0732921	1976.929412	190.4577734	306.3366907
93.77666828	1096.675109	975.1272186	37829.37933	489.2460685	6939.082947	893.1388567	1977.715182	190.474789	306.3535559
93.8490538	1096.77084	974.5797897	37839.55308	489.2844959	6939.629663	893.2086987	1978.514171	190.4831093	306.3618027
93.90887122	1096.837155	974.7611524	37847.9442	489.3132895	6940.064775	893.2614003	1979.173619	190.5037596	306.3822705
93.959039	1096.883717	975.3618356	37854.97034	489.3353422	6940.417898	893.3020522	1979.726116	190.5308288	306.4091005
94.01207693	1096.941457	975.5688535	37862.39405	489.3606028	6940.801686	893.3483173	1980.30992	190.5501127	306.4282141
94.07754077	1097.017735	975.5698208	37871.548	489.3929166	6941.28128	893.4073356	1981.029966	190.5683511	306.4462912
94.1520214	1097.111944	975.1942805	37881.95098	489.4313658	6941.835726	893.4773248	1981.848483	190.5808725	306.4587021
94.20540652	1097.166051	975.590685	37889.39264	489.455822	6942.21573	893.5222388	1982.43443	190.6043183	306.4819406
94.25879163	1097.22385	975.7995806	37896.82772	489.4811144	6942.600075	893.5685632	1983.019986	190.6236659	306.5011173
94.32367902	1097.29898	975.8055444	37905.85587	489.5129613	6943.072963	893.626732	1983.731179	190.6417628	306.5190543
94.39718785	1097.390794	975.4720076	37916.07191	489.5505583	6943.616575	893.6951909	1984.536171	190.6548274	306.5320034
94.46405353	1097.475489	975.1043397	37925.35202	489.5850074	6944.112003	893.7578791	1985.267698	190.6652859	306.5423695
94.51815139	1097.526431	975.6803206	37932.84411	489.6088187	6944.490172	893.8017275	1985.858766	190.6927443	306.5695853
94.5683993	1097.576768	976.0615282	37939.79687	489.6316187	6944.844951	893.8436072	1986.407407	190.7148861	306.5915314
94.62703229	1097.642445	976.1564283	37947.90365	489.6598054	6945.267351	893.8951464	1987.047209	190.7330871	306.6095715
94.69815839	1097.727013	976.0217764	37957.72681	489.695104	6945.785421	893.9595317	1987.822689	190.7497028	306.6260405
94.77054401	1097.82122	975.4724756	37967.71263	489.7328775	6946.322377	894.0281782	1988.611216	190.7576088	306.6338766
94.83036158	1097.886267	975.652869	37975.94866	489.7611287	6946.74942	894.0798887	1989.262026	190.7779296	306.6540178
94.88052946	1097.931758	976.2531523	37982.84488	489.7827252	6947.095772	894.1197071	1989.807283	190.8047317	306.6805831
94.93356747	1097.988375	976.4593576	37990.13136	489.8075058	6947.472419	894.165095	1990.383438	190.8237252	306.6994087
94.99903138	1098.063272	976.4590906	37999.11614	489.8392289	6947.943215	894.2230337	1991.094049	190.8416003	306.7171259
95.07351212	1098.155921	976.0818064	38009.32694	489.8770086	6948.487674	894.2917989	1991.901842	190.8537017	306.7291203
95.12689736	1098.208898	976.477565	38016.63103	489.9009827	6948.860515	894.3358321	1992.480109	190.8768598	306.7520738
95.18028261	1098.265572	976.6856464	38023.92868	489.9257943	6949.237708	894.3812779	1993.05799	190.8959164	306.770962
95.24517008	1098.339341	976.6903974	38032.78999	489.9570587	6949.701919	894.4383819	1993.75986	190.9136552	306.7885441
95.31867897	1098.429621	976.3551825	38042.81729	489.9939979	6950.235722	894.5056384	1994.5543	190.926308	306.8010851
95.38554475	1098.512924	975.9859333	38051.92595	490.0278499	6950.722241	894.567235	1995.276237	190.9363911	306.8110791
95.43964274	1098.562725	976.5614198	38059.27951	490.0511751	6951.093193	894.6101952	1995.859554	190.9635634	306.8380112
95.48989077	1098.612007	976.9420328	38066.10373	490.0735246	6951.441278	894.6512519	1996.400998	190.9854367	306.8596912
95.54852385	1098.676459	977.0359249	38074.06069	490.1011877	6951.855883	894.7018342	1997.032408	191.0033178	306.8774143
95.61965001	1098.759549	976.8998277	38083.70234	490.1358531	6952.364516	894.7650619	1997.797718	191.0195412	306.8934944
95.69203574	1098.852261	976.3486891	38093.50371	490.1729847	6952.89189	894.832535	1998.575903	191.0270403	306.9009273
95.75185344	1098.916062	976.528131	38101.58752	490.2007036	6953.311012	894.8832728	1999.218174	191.0470378	306.920748
95.80202143	1098.960502	977.1280222	38108.35621	490.2218523	6953.650717	894.922273	1999.756275	191.0735778	306.9470535
95.85505952	1099.016017	977.3334298	38115.50801	490.2461617	6954.020355	894.9667999	2000.324868	191.0922861	306.9655965
95.9205235	1099.089559	977.3319513	38124.32675	490.2773049	6954.482515	895.0236788	2001.026154	191.1098047	306.9829602
95.99500436	1099.180675	976.9529546	38134.34892	490.3144274	6955.017171	895.0912427	2001.823346	191.1214937	306.994546
96.04838971	1099.232544	977.34808	38141.51797	490.3379284	6955.382979	895.1344113	2002.394021	191.1443695	307.0172197
96.10177507	1099.288113	977.5553625	38148.68074	490.3622681	6955.753152	895.1789947	2002.964315	191.1631406	307.0358249
96.16666263	1099.360546	977.5589229	38157.3783	490.3929606	6956.208844	895.2350535	2003.65697	191.1805279	307.0530585
96.2401716	1099.449321	977.2220603	38167.22034	490.4292543	6956.733018	895.3011299	2004.440979	191.1927764	307.0651988
96.30703748	1099.531257	976.8512576	38176.16074	490.4625201	6957.210794	895.361655	2005.153438	191.2024911	307.0748277
96.3611356	1099.579939	977.4262601	38183.37832	490.4853681	6957.57466	895.4037434	2005.729091	191.2293825	307.1014814
96.41138372	1099.628185	977.80629	38190.07638	490.5072755	6957.916174	895.4439922	2006.263423	191.2509922	307.1229002
96.47001688	1099.691435	977.8991928	38197.88628	490.5344247	6958.323127	895.4936353	2006.886538	191.2685594	307.1403121
96.54114313	1099.773073	977.7616769	38207.34977	490.5684684	6958.822496	895.5557268	2007.641794	191.2843976	307.1560104
96.61352898	1099.864318	977.2087333	38216.9701	490.60497	6959.340465	895.6220481	2008.409757	191.2914975	307.1630476
96.67334681	1099.926897	977.3872412	38224.90451	490.6321665	6959.751811	895.671831	2009.043588	191.3111775	307.1825536
96.72351489	1099.970305	977.9867485	38231.54803	490.6528756	6960.084991	895.7100282	2009.574615	191.3374603	307.2086042
96.77655304	1100.024737	978.1913734	38238.56763	490.6767225	6960.447748	895.7537098	2010.135734	191.3558887	307.2268697
96.8420171	1100.096949	978.1887058	38247.22341	490.7072966	6960.90143	895.8095486	2010.827801	191.3730574	307.2438867
96.91649808	1100.186561	977.8080278	38257.06043	490.7437741	6961.426462	895.8759332	2011.614515	191.3843416	307.2550712
96.96988354	1100.237342	978.2025318	38264.09694	490.7668105	6961.785367	895.9182532	2012.177686	191.4069404	307.2774703
97.023269	1100.291827	978.4090301	38271.12732	490.7906871	6962.148648	895.9619902	2012.740481	191.4254311	307.2957977
97.08815666	1100.362948	978.411422	38279.66415	490.8208182	6962.595979	896.017023	2013.424028	191.4424734	307.3126893
97.16166571	1100.450245	978.0729418	38289.32437	490.8564783	6963.110701	896.0819411	2014.197728	191.4543252	307.3244363
97.2285317	1100.53084	977.7006139	38298.09961	490.8891687	6963.579893	896.1414145	2014.900817	191.4636783	307.3337068
97.28262993	1100.578422	978.2751418	38305.18374	490.9115484	6963.936803	896.1826472	2015.468896	191.4902939	307.3600872
97.33287815	1100.625651	978.6545995	38311.75796	490.9330218	6964.271866	896.222103	2015.996197	191.5116449	307.3812496
97.39151138	1100.687721	978.7465312	38319.42353	490.9596665	6964.671309	896.2708241	2016.611114	191.528904	307.3983561
97.46263771	1100.767935	978.6076227	38328.71216	490.9931001	6965.161583	896.3318004	2017.356431	191.5443642	307.4136798
97.53502369	1100.857739	978.0529068	38338.15479	491.0289833	6965.670319	896.3969912	2018.114291	191.5510722	307.4203285
97.59484165	1100.919118	978.2304982	38345.94256	491.0556669	6966.074032	896.4458368	2018.73978	191.5704406	307.4395258
97.64500981	1100.961513	978.829629	38352.46322	491.0759446	6966.400808	896.4832458	2019.263814	191.5964709	307.4653261
97.69804802	1101.014882	979.0334856	38359.35307	491.0993376	6966.756809	896.5260978	2019.817546	191.6146246	307.4833193
97.76351215	1101.08579	979.0296508	38367.84889	491.129353	6967.202169	896.5809155	2020.500502	191.6314498	307.4999958
97.83799327	1101.173925	978.6473224	38377.50419	491.1651973	6967.717755	896.6461428	2021.27686	191.6423368	307.5107866
97.89137883	1101.223637	979.0412167	38384.41062	491.1877779	6968.069883	896.6876298	2021.832613	191.6646636	307.5329161
97.94476439	1101.277058	979.2469452	38391.31106	491.2111998	6968.426399	896.7305359	2022.387997	191.6828792	307.5509707
98.00965215	1101.346892	979.24819	38399.69013	491.24078	6968.865522	896.7845617	2023.062541	191.6995827	307.5675267
98.08316128	1101.432737	978.908122	38409.17188	491.275818	6969.370966	896.8483428	2023.82605	191.7110451	307.5788877
98.15002738	1101.512015	978.5342967	38417.78502	491.3079438	6969.831731	896.9067839	2024.519879	191.7200432	307.5878064
98.20412571	1101.558519	979.1083592	38424.73816	491.3298637	6970.181813	896.9471766	2025.080471	191.7463883	307.6139186
98.25437402	1101.604749	979.4872553	38431.19084	491.3509112	6970.510544	896.9858541	2025.600823	191.7674854	307.6348293
98.31300733	1101.665662	979.5782338	38438.71474	491.3770607	6970.902614	897.0336703	2026.207637	191.784442	307.6516361
98.38413374	1101.744477	979.4379584	38447.83174	491.4098954	6971.38396	897.0935519	2026.943133	191.7995312	307.6665919
98.45651985	1101.832867	978.8815028	38457.09997	491.4451717	6971.883633	897.157633	2027.691006	191.8058545	307.6728593
98.51633794	1101.893068	979.0581945	38464.7438	491.4713519	6972.279853	897.2055587	2028.308249	191.8249171	307.6917535
98.56650617	1101.934468	979.6569559	38471.14388	491.491206	6972.600341	897.242194	2028.825373	191.8506996	307.7173082
98.61954444	1101.986795	979.8600583	38477.90638	491.5141534	6972.949712	897.2842317	2029.371803	191.8685836	307.7350342
98.68500864	1102.056421	979.8550779	38486.2452	491.5436205	6973.386902	897.3380473	2030.045754	191.8850716	307.7513765
98.7594899	1102.143106	979.4711294	38495.72214	491.5788433	6973.893216	897.4021384	2030.811876	191.8955687	307.7617808
98.81287555	1102.191769	979.8644253	38502.50089	491.6009765	6974.238691	897.4428078	2031.360298	191.9176286	307.7836458
98.86626121	1102.244146	980.0693983	38509.27378	491.6239521	6974.588566	897.4848983	2031.908356	191.9355741	307.8014327
98.93114906	1102.312716	980.0695172	38517.49802	491.6529915	6975.019631	897.5379358	2032.574002	191.9519452	307.8176592
99.00465828	1102.397137	979.7278905	38526.8046	491.687419	6975.515967	897.6006009	2033.32744	191.9630253	307.8286413
99.07152448	1102.475123	979.3525955	38535.25863	491.7189905	6975.96846	897.6580287	2034.012116	191.9716751	307.8372147
99.12562292	1102.520567	979.9262011	38542.0832	491.7404592	6976.311841	897.697597	2034.565309	191.9977545	307.8630636
99.17587131	1102.565817	980.304546	38548.41659	491.7610885	6976.634355	897.7355104	2035.078793	192.0186024	307.8837273
99.2345047	1102.625593	980.3945889	38555.80143	491.786752	6977.019187	897.7824383	2035.677597	192.0352621	307.9002398
99.30563119	1102.703035	980.2529717	38564.74998	491.8189989	6977.49177	897.8412455	2036.403386	192.0499871	307.9148347
99.37801743	1102.790037	979.6948084	38573.84703	491.8536793	6977.982546	897.9042374	2037.141389	192.0559328	307.9207278
99.43783564	1102.849082	979.870617	38581.34959	491.8793654	6978.37141	897.9512601	2037.750484	192.0746953	307.9393245
99.48800395	1102.889506	980.469016	38587.63131	491.8988039	6978.685727	897.9871359	2038.260777	192.1002345	307.9646381
99.54104227	1102.940809	980.6713782	38594.26881	491.9213139	6979.028588	898.0283744	2038.799991	192.1178539	307.9821017
99.60650654	1103.009177	980.6652733	38602.45354	491.9502428	6979.457759	898.0812062	2039.465041	192.134011	307.9981161
99.68098793	1103.094439	980.2797346	38611.75541	491.9848556	6979.95497	898.1441823	2040.221047	192.1441253	308.008141
99.73437368	1103.142073	980.672443	38618.40884	492.0065495	6980.293915	898.1840491	2040.762224	192.1659232	308.0297463
99.78775944	1103.193424	980.8766745	38625.05655	492.0290872	6980.637271	898.2253392	2041.303041	192.1836036	308.0472705
99.85264737	1103.260753	980.8756883	38633.12881	492.0575957	6981.060427	898.2774064	2041.959893	192.1996485	308.0631736
99.92615669	1103.343776	980.5325309	38642.26347	492.091424	6981.547822	898.3389761	2042.703378	192.2103534	308.0737838
99.993023	1103.420493	980.1557928	38650.56134	492.1224514	6981.992195	898.3954094	2043.379008	192.2186612	308.0820182
100.0471215	1103.464898	980.7289513	38657.25971	492.1434771	6982.328996	898.4341684	2043.924888	192.2444799	308.1076088
100.09737	1103.509185	981.1067553	38663.47601	492.163696	6982.645409	898.4713319	2044.431584	192.2650832	308.1280301
100.1560035	1103.567846	981.1958796	38670.72438	492.1888825	6983.023135	898.517388	2045.022473	192.2814515	308.1442537
100.22713	1103.64394	981.0529452	38679.50758	492.2205523	6983.487116	898.5751404	2045.738667	192.295819	308.1584943
100.2995164	1103.729579	980.4931046	38688.43662	492.254648	6983.969159	898.6370633	2046.466917	192.3013941	308.1640201
100.3593347	1103.787489	980.6680474	38695.80052	492.2798491	6984.350802	898.6831997	2047.067957	192.319862	308.1823248
100.4095031	1103.826955	981.266091	38701.96607	492.2988796	6984.65906	898.71833	2047.5715	192.3451625	308.2074017
100.4625415	1103.877253	981.4677266	38708.48088	492.3209603	6984.995532	898.758784	2048.103582	192.362522	308.2246078
100.5280058	1103.944386	981.4605179	38716.51436	492.3493609	6985.416831	898.8106503	2048.759836	192.3783543	308.2403002
100.6024874	1104.028252	981.0734177	38725.64441	492.3833749	6985.905106	898.8725318	2049.505844	192.3880929	308.2499528
100.6558732	1104.074875	981.4655501	38732.17483	492.4046377	6986.237641	898.9116108	2050.03986	192.4096337	308.2713032
100.709259	1104.125219	981.6690538	38738.69967	492.4267454	6986.574597	898.9521152	2050.573521	192.4270539	308.2885695
100.7741471	1104.19133	981.6669829	38746.62277	492.4547329	6986.989988	899.0032301	2051.221683	192.4427785	308.3041552
100.8476565	1104.272981	981.3223225	38755.58868	492.487973	6987.468607	899.0637246	2051.955331	192.4531151	308.3144004
100.9145229	1104.348453	980.944167	38763.73327	492.5184664	6987.90501	899.1191817	2052.622022	192.4610872	308.3223021
100.9686215	1104.391837	981.5168877	38770.30778	492.5390573	6988.235352	899.1571463	2053.160674	192.4866501	308.3476391
101.01887	1104.43518	981.894161	38776.40915	492.5588734	6988.545775	899.1935737	2053.660661	192.5070133	308.3678223
101.0775036	1104.492745	981.9823839	38783.52356	492.5835916	6988.916527	899.238774	2054.243727	192.5230956	308.3837625
101.1486303	1104.567517	981.8381564	38792.14449	492.6146951	6989.372063	899.2954913	2054.950441	192.5371122	308.3976553
101.2210168	1104.651818	981.2766686	38800.90862	492.6482168	6989.845533	899.3563648	2055.66905	192.5423235	308.4028205
101.2808352	1104.708614	981.4507616	38808.13642	492.6729419	6990.220089	899.4016312	2056.262131	192.5605022	308.4208386
101.3310036	1104.747139	982.0484572	38814.18794	492.6915718	6990.522399	899.4360299	2056.759003	192.5855684	308.4456833
101.3840421	1104.79645	982.2493797	38820.58234	492.7132311	6990.852598	899.4757138	2057.284036	192.6026729	308.4626366
101.4495065	1104.862371	982.2410875	38828.46737	492.7411132	6991.26617	899.5266323	2057.931598	192.6181864	308.4780131
101.5239882	1104.944866	981.8524543	38837.42877	492.7745395	6991.745673	899.5874395	2058.667725	192.6275562	308.4873001
101.5773741	1104.990497	982.2440216	38843.83846	492.7953792	6992.071915	899.6257453	2059.194665	192.6488446	308.5084004
101.63076	1105.039853	982.446811	38850.2427	492.8170648	6992.402589	899.6654784	2059.721254	192.6660095	308.5254135
101.6956481	1105.104769	982.4436752	38858.01939	492.8445408	6992.810359	899.7156586	2060.360827	192.6814198	308.5406876
101.7691577	1105.185072	982.0975394	38866.81968	492.8772037	6993.280363	899.7750978	2061.084754	192.6913948	308.5505745
101.8360242	1105.259321	981.7179922	38874.81383	492.9071729	6993.708941	899.8295967	2061.74261	192.6990375	308.5581496
101.8901229	1105.301703	982.2902836	38881.26677	492.9273371	6994.032943	899.8667815	2062.27412	192.7243492	308.5832378
101.9403714	1105.344119	982.6670363	38887.25533	492.9467577	6994.337486	899.9024864	2062.767477	192.7444768	308.6031874
101.999005	1105.400609	982.7543743	38894.23826	492.9710163	6994.701391	899.9468467	2063.342813	192.7602783	308.6188493
102.0701319	1105.474082	982.6088776	38902.69991	493.0015639	6995.148639	900.002548	2064.040157	192.7739506	308.6324008
102.1425185	1105.557071	982.0457725	38911.30218	493.0345222	6995.613693	900.0623915	2064.74924	192.7788047	308.637212
102.202337	1105.612773	982.2190315	38918.39639	493.05878	6995.981291	900.1068039	2065.334455	192.7966996	308.6549488
102.2525055	1105.650375	982.8163857	38924.33601	493.0770168	6996.277763	900.1404844	2065.824734	192.8215358	308.6795655
102.305544	1105.698717	983.0166083	38930.61221	493.0982625	6996.601804	900.1794124	2066.342802	192.83839	308.6962708
102.3710085	1105.763448	983.0072526	38938.35154	493.1256356	6997.007791	900.2294007	2066.981774	192.8535906	308.7113371
102.4454903	1105.844597	982.6171146	38947.14741	493.1584851	6997.478684	900.2891533	2067.708137	192.8625985	308.7202654
102.4988763	1105.889254	983.0081273	38953.4386	493.1789093	6997.798749	900.3267001	2068.228083	192.8836392	308.7411201
102.5522623	1105.937641	983.2102155	38959.72447	493.2001807	6998.123256	900.3656763	2068.747684	192.9005533	308.7578848
102.6171505	1106.001382	983.2060347	38967.35745	493.2271548	6998.523545	900.4149389	2069.378769	192.9156551	308.7728531
102.6906602	1106.080364	982.8584505	38975.99518	493.2592509	6998.985091	900.4733423	2070.09309	192.9252753	308.7823883
102.7575268	1106.153413	982.4775371	38983.84167	493.2887057	6999.405989	900.5269007	2070.742215	192.9325945	308.7896429
102.8116256	1106.194811	983.0494075	38990.17528	493.3084509	6999.723767	900.5633202	2071.266667	192.9576598	308.8144867
102.8618742	1106.236317	983.4256491	38996.05313	493.3274834	7000.022538	900.5983159	2071.753473	192.9775561	308.8342071
102.9205079	1106.291751	983.5121186	39002.90701	493.3512909	7000.379723	900.6418517	2072.321169	192.993082	308.8495959
102.9916348	1106.36395	983.365376	39011.21232	493.3812929	7000.818833	900.6965556	2073.009254	193.0064163	308.8628123
103.0640216	1106.445649	982.8006832	39019.65572	493.4136982	7001.275627	900.7553881	2073.708923	193.0109199	308.8672761
103.1238402	1106.500278	982.9731236	39026.61883	493.4374973	7001.636394	900.7989624	2074.286365	193.0285362	308.8847368
103.1740087	1106.536973	983.570143	39032.44859	493.4553482	7001.927136	900.8319378	2074.770129	193.0531467	308.9091297
103.2270472	1106.584365	983.7696786	39038.60878	493.4761879	7002.245133	900.8701239	2075.281314	193.0697552	308.9255915
103.2925118	1106.647928	983.7592791	39046.2051	493.5030615	7002.643673	900.9191991	2075.911797	193.0846487	308.9403534
103.3669938	1106.727756	983.3676639	39054.83851	493.5353447	7003.106114	900.9779167	2076.628511	193.0933013	308.9489295
103.4203798	1106.771457	983.7581323	39061.01339	493.5553613	7003.420115	901.0147186	2077.141547	193.1140988	308.9695432
103.4737659	1106.818891	983.9595323	39067.18307	493.5762261	7003.738569	901.0529517	2077.654242	193.1307669	308.9860641
103.5386542	1106.881481	983.9543257	39074.67501	493.6027074	7004.131513	901.1013138	2078.27694	193.1455658	309.0007322
103.612164	1106.959165	983.6053197	39083.15318	493.6342473	7004.584758	901.1587004	2078.981767	193.1548377	309.0099222
103.6790307	1107.031035	983.2230652	39090.85474	493.6631971	7004.998117	901.2113356	2079.622266	193.1618395	309.0168621
103.7331296	1107.071468	983.7945223	39097.07123	493.6825311	7005.309785	901.2470039	2080.139743	193.1866629	309.0414662
103.7833782	1107.11208	984.1702624	39102.84041	493.7011827	7005.60289	901.2813034	2080.620074	193.2063321	309.0609615
103.842012	1107.166479	984.2558794	39109.56763	493.7245473	7005.953477	901.3240299	2081.180222	193.2215876	309.0760822
103.913139	1107.237426	984.1079139	39117.7195	493.7540137	7006.3846	901.3777549	2081.859157	193.23459	309.0889698
103.9855259	1107.317861	983.5416627	39126.00697	493.7858762	7006.833285	901.4355951	2082.549524	193.2387496	309.0930926
104.0453447	1107.371435	983.7132995	39132.84138	493.8092252	7007.187348	901.4783466	2083.119285	193.2560925	309.1102822
104.0955132	1107.407241	984.3099904	39138.56333	493.8266973	7007.472463	901.5106301	2083.596611	193.2804814	309.1344556
104.1485517	1107.453699	984.5088517	39144.60966	493.8471385	7007.784527	901.548088	2084.100994	193.2968488	309.1506784
104.2140164	1107.516116	984.4974276	39152.06561	493.8735217	7008.175758	901.596267	2084.723088	193.3114408	309.1651414
104.2884985	1107.594647	984.1043624	39160.53955	493.9052492	7008.629902	901.6539686	2085.430268	193.3197447	309.1733719
104.3418847	1107.637409	984.4942965	39166.60027	493.9248655	7008.937951	901.6900392	2085.936476	193.3403035	309.1937491
104.3952708	1107.683909	984.695021	39172.65592	493.9453312	7009.250462	901.7275429	2086.442347	193.3567301	309.2100305
104.4601592	1107.745368	984.6888075	39180.00942	493.9713289	7009.636198	901.7750211	2087.056757	193.3712318	309.224404
104.5336691	1107.821777	984.3384061	39188.33099	494.0023229	7010.081294	901.8314097	2087.752204	193.3801619	309.2332552
104.6005359	1107.892491	983.9548351	39195.8903	494.030777	7010.487251	901.8831388	2088.384178	193.3868521	309.2398863
104.6546348	1107.931977	984.5258867	39201.99183	494.0497074	7010.792922	901.9180697	2088.894763	193.411438	309.264255
104.7048836	1107.971712	984.9011345	39207.65434	494.067985	7011.080465	901.951686	2089.368697	193.4308843	309.2835295
104.7635174	1108.025094	984.9859147	39214.25724	494.090915	7011.424576	901.9936181	2089.921385	193.4458744	309.2983871
104.8346445	1108.094813	984.8367489	39222.2585	494.1198557	7011.847858	902.0463822	2090.591279	193.4585511	309.3109518
104.9070315	1108.174005	984.2689679	39230.39293	494.1511854	7012.288583	902.1032484	2091.272454	193.462373	309.3147399
104.9668504	1108.226545	984.4398161	39237.10103	494.1740925	7012.636065	902.1451923	2091.834625	193.4794475	309.3316636
105.017019	1108.261477	985.0361844	39242.71715	494.1911929	7012.915658	902.1767967	2092.305589	193.5036189	309.3556213
105.0700576	1108.30702	985.2343838	39248.65172	494.211243	7013.221897	902.2135397	2092.803252	193.5197497	309.3716096
105.1355223	1108.368311	985.221954	39255.9699	494.2371448	7013.605953	902.260839	2093.417058	193.5340457	309.3857793
105.2100046	1108.445569	984.8274657	39264.28733	494.2683268	7014.051953	902.3175434	2094.114816	193.5420073	309.3936705
105.2633908	1108.48741	985.2168754	39270.236	494.2875503	7014.354159	902.3528962	2094.614276	193.5623319	309.4138155
105.316777	1108.532992	985.4169368	39276.17972	494.3076243	7014.660837	902.3896841	2095.113404	193.5785215	309.429862
105.3816655	1108.593341	985.409735	39283.39735	494.3331472	7015.039496	902.4362946	2095.719625	193.5927314	309.4439463
105.4551755	1108.6685	985.0579637	39291.5652	494.3636053	7015.476592	902.4917036	2096.405804	193.6013259	309.4524649
105.5220424	1108.738079	984.6731006	39298.98489	494.3915729	7015.875284	902.5425433	2097.029354	193.6077103	309.4587929
105.5761414	1108.776634	985.2437542	39304.97359	494.4101072	7016.175068	902.5767504	2097.533129	193.6320632	309.4829306
105.6263902	1108.815508	985.6185187	39310.53141	494.4280177	7016.457152	902.609696	2098.000742	193.6512907	309.5019883
105.685024	1108.867892	985.7024776	39317.01229	494.4505211	7016.794906	902.6508485	2098.546059	193.6660202	309.5165876
105.7561512	1108.936405	985.5521336	39324.86572	494.4789458	7017.210491	902.7026694	2099.20702	193.6783773	309.5288355
105.8285384	1109.014378	984.9828511	39332.84993	494.5097526	7017.643402	902.7585795	2099.879112	193.6818677	309.532295
105.8883574	1109.065903	985.1529251	39339.43406	494.5322259	7017.984423	902.7997308	2100.433783	193.6986788	309.5489576
105.9385261	1109.099977	985.7489769	39344.94632	494.5489614	7018.258595	902.8306685	2100.898462	193.7226367	309.5727038
105.9915646	1109.144621	985.9465267	39350.77119	494.5686275	7018.559118	902.8667099	2101.389484	193.7385352	309.5884617
106.0570294	1109.204807	985.9331097	39357.95415	494.5940569	7018.93613	902.9131457	2101.9951	193.7525408	309.6023436
106.1315119	1109.280816	985.5372244	39366.11794	494.6247034	7019.374135	902.9688713	2102.68355	193.7601664	309.6099018
106.1848981	1109.321752	985.9261194	39371.95664	494.6435414	7019.670605	903.0035196	2103.176343	193.780261	309.6298189
106.2382844	1109.366434	986.12553	39377.7905	494.6632308	7019.971558	903.0396048	2103.668808	193.796218	309.6456348
106.303173	1109.425693	986.117358	39384.87477	494.6882878	7020.343269	903.0853637	2104.266937	193.8101415	309.6594353
106.3766831	1109.499624	985.7642423	39392.89175	494.71822	7020.772514	903.1398112	2104.943957	193.8184067	309.6676275
106.4435501	1109.568088	985.3781109	39400.17439	494.74571	7021.164074	903.1897778	2105.559185	193.8244909	309.6736579
106.4976492	1109.60573	985.9483737	39406.05235	494.7638554	7021.458079	903.2232746	2106.056231	193.848615	309.6975688
106.547898	1109.64376	986.322664	39411.50742	494.7814057	7021.734803	903.2555619	2106.517598	193.8676279	309.7164137
106.6065319	1109.695163	986.4058166	39417.86853	494.8034903	7022.066317	903.295949	2107.055633	193.8821016	309.7307595
106.6776592	1109.762493	986.2543162	39425.57687	494.8314085	7022.474347	903.3468442	2107.707767	193.8941449	309.7426964
106.7500466	1109.839269	985.6835598	39433.41364	494.861702	7022.899588	903.4018159	2108.370885	193.89731	309.7458335
106.8098656	1109.889797	985.852874	39439.87608	494.8837496	7023.234267	903.4421892	2108.918146	193.9138625	309.7622398
106.8600343	1109.92303	986.4486151	39445.28639	494.9001269	7023.503118	903.4724724	2109.376615	193.9376109	309.7857783
106.9130729	1109.966791	986.6455272	39451.0036	494.9194162	7023.798028	903.5078252	2109.861075	193.9532813	309.8013103
106.9785378	1110.025893	986.6311413	39458.05383	494.9443818	7024.168126	903.5534134	2110.458599	193.9670019	309.8149096
107.0530204	1110.100675	986.2338848	39466.06685	494.9745028	7024.598284	903.6081782	2111.137851	193.9742977	309.822141
107.1064067	1110.140724	986.6222745	39471.7976	494.9929623	7024.889124	903.6421351	2111.624056	193.9941667	309.8418343
107.159793	1110.184521	986.8210463	39477.52363	495.0122743	7025.184455	903.6775305	2112.109939	194.0098952	309.8574239
107.2246817	1110.242711	986.8119222	39484.477	495.0368739	7025.549348	903.7224535	2112.700073	194.0235376	309.8709458
107.2981919	1110.315436	986.4574867	39492.3459	495.0662898	7025.970884	903.7759572	2113.368045	194.0314796	309.8788175
107.3650591	1110.382807	986.0701103	39499.49404	495.093311	7026.355444	903.825067	2113.975048	194.0372691	309.8845559
107.4191582	1110.419552	986.6399897	39505.26329	495.1110748	7026.643776	903.8578664	2114.465446	194.0611687	309.9082443
107.469407	1110.456752	987.0138144	39510.61751	495.1282715	7026.91524	903.8895076	2114.920642	194.0799709	309.9268803
107.528041	1110.507194	987.0961757	39516.86106	495.149945	7027.240628	903.9291435	2115.451481	194.0941935	309.9409773
107.5991684	1110.573362	986.9435402	39524.427	495.1773661	7027.641241	903.97913	2116.094895	194.1059289	309.952609
107.6715559	1110.648964	986.3713371	39532.11905	495.2071557	7028.058953	904.0331805	2116.749146	194.1087746	309.9554295
107.7313751	1110.698513	986.5399054	39538.46206	495.2287854	7028.387407	904.0727902	2117.289086	194.1250734	309.9715843
107.7815438	1110.73092	987.1353416	39543.77231	495.2448112	7028.651034	904.1024311	2117.741418	194.1486161	309.9949189
107.8345824	1110.773814	987.3316278	39549.38385	495.2637306	7028.940435	904.1371079	2118.219396	194.1640627	310.0102291
107.9000474	1110.831851	987.3162909	39556.3038	495.2882411	7029.303747	904.1818643	2118.808924	194.1775034	310.023551
107.9745301	1110.905429	986.9176885	39564.16882	495.3178461	7029.7262	904.235686	2119.479089	194.1844756	310.0304616
108.0279165	1110.944607	987.3055822	39569.79362	495.3359342	7030.011514	904.2689641	2119.958786	194.204123	310.0499354
108.0813029	1110.987537	987.503727	39575.41382	495.3548758	7030.301328	904.3036826	2120.438165	194.2196274	310.0653028
108.1461916	1111.044676	987.4936682	39582.23871	495.3790265	7030.659527	904.347785	2121.020399	194.2329939	310.0785512
108.219702	1111.116218	987.1379374	39589.96226	495.4079355	7031.073496	904.4003624	2121.679431	194.2406186	310.0861084
108.2865692	1111.182516	986.749339	39596.97838	495.4344967	7031.451185	904.4486311	2122.27831	194.2461189	310.0915602
108.3406684	1111.218381	987.318842	39602.64095	495.4518859	7031.733948	904.480746	2122.762139	194.2697981	310.1150301
108.3909173	1111.254767	987.6922097	39607.89617	495.4687354	7032.000248	904.511753	2123.211238	194.2883934	310.1334611
108.4495513	1111.304264	987.7737943	39614.02435	495.4900055	7032.319623	904.5506516	2123.734968	194.3023697	310.1473139
108.5206788	1111.369291	987.6200446	39621.45051	495.5169386	7032.712956	904.5997462	2124.369765	194.3138028	310.1586459
108.5930664	1111.44374	987.0464215	39629.00051	495.5462337	7033.123276	904.6528926	2125.015256	194.316335	310.1611558
108.6528857	1111.492329	987.2142578	39635.2263	495.5674533	7033.445619	904.6917526	2125.547963	194.3323847	310.1770637
108.7030545	1111.523925	987.8093946	39640.43834	495.5831339	7033.704119	904.7207631	2125.994232	194.3557256	310.2001983
108.7560931	1111.565968	988.0050664	39645.94615	495.6016902	7033.988113	904.7547764	2126.465805	194.3709525	310.2152906
108.8215581	1111.622961	987.988796	39652.73825	495.625754	7034.344762	904.7987162	2127.047435	194.3841186	310.2283404
108.896041	1111.695357	987.5888725	39660.458	495.6548526	7034.759653	904.8516123	2127.708621	194.390773	310.2349361
108.9494274	1111.733679	987.9762795	39665.97881	495.6725761	7035.039542	904.8842241	2128.181887	194.410203	310.2541943
109.0028139	1111.775757	988.1738088	39671.49514	495.6911541	7035.32394	904.9182781	2128.65484	194.4254874	310.2693436
109.0677027	1111.831866	988.1628326	39678.19392	495.7148641	7035.675568	904.9615752	2129.229271	194.4385831	310.2823236
109.1412132	1111.902247	987.8058303	39685.77481	495.7432758	7036.08211	905.0132433	2129.87947	194.4458963	310.2895722
109.2080805	1111.96749	987.4160325	39692.66135	495.7693853	7036.453053	905.0606864	2130.470321	194.4511128	310.2947426
109.2621798	1112.002492	987.9851661	39698.21921	495.7864067	7036.73035	905.0921295	2130.947661	194.4745756	310.3179981
109.3124287	1112.038078	988.3580852	39703.37727	495.8029156	7036.99158	905.122514	2131.390736	194.4929679	310.3362279
109.3710628	1112.086648	988.4389074	39709.3922	495.8237897	7037.305053	905.1606888	2131.907443	194.5067023	310.3498409
109.4421904	1112.150556	988.284064	39716.68116	495.8502439	7037.69124	905.208908	2132.533727	194.5178387	310.3608789
109.5145781	1112.223873	987.7090472	39724.09176	495.8790535	7038.094305	905.2611669	2133.170563	194.5200633	310.3630839
109.5743975	1112.271519	987.8761649	39730.20248	495.8998705	7038.41065	905.2992912	2133.696124	194.5358685	310.3787494
109.6245663	1112.302319	988.4710079	39735.31812	495.9152124	7038.664116	905.3276829	2134.136404	194.5590112	310.4016876
109.677605	1112.343528	988.6660766	39740.72413	495.9334123	7038.942801	905.361045	2134.601649	194.5740225	310.4165662
109.74307	1112.399494	988.6488899	39747.39073	495.9570376	7039.292911	905.4041832	2135.175474	194.586919	310.4293488
109.817553	1112.47073	988.2476698	39754.96791	495.9856392	7039.700379	905.4561708	2135.827791	194.5932617	310.4356354
109.8709396	1112.508213	988.6345989	39760.38665	496.0030048	7039.974942	905.4881287	2136.294704	194.6124782	310.4546821
109.9243261	1112.549455	988.8315241	39765.80102	496.0212258	7040.254024	905.5215304	2136.761309	194.6275466	310.4696174
109.989215	1112.604552	988.8196474	39772.37602	496.0445033	7040.599202	905.564037	2137.32803	194.6403765	310.4823339
110.0627256	1112.673793	988.4613971	39779.8169	496.0724268	7040.998453	905.6148126	2137.969502	194.6473841	310.4892795
110.129593	1112.738001	988.0704221	39786.57625	496.098093	7041.362775	905.6614453	2138.552423	194.6523219	310.4941738
110.1836923	1112.772155	988.6391929	39792.03133	496.1147535	7041.634706	905.6922291	2139.023352	194.6755724	310.5172188
110.2339413	1112.806957	989.0116718	39797.09402	496.130928	7041.89096	905.7220024	2139.460476	194.6937655	310.5352511
110.2925754	1112.854617	989.0917457	39802.9978	496.1514134	7042.198639	905.7594669	2139.970244	194.7072625	310.5486288
110.3637031	1112.917426	988.9358289	39810.15211	496.1773974	7042.577811	905.8068268	2140.588118	194.7181076	310.5593781
110.436091	1112.989632	988.3594439	39817.42586	496.2057306	7042.973754	905.8582146	2141.216403	194.7200303	310.5612838
110.4959104	1113.036353	988.5258563	39823.42365	496.2261524	7043.28421	905.8956167	2141.734904	194.7355954	310.5767114
110.5460793	1113.066371	989.1204109	39828.44468	496.2411619	7043.532736	905.9234011	2142.169267	194.7585437	310.5994569
110.599118	1113.10676	989.3148878	39833.75077	496.259012	7043.80621	905.9561239	2142.628261	194.7733433	310.6141257
110.6645831	1113.16172	989.2968017	39840.29419	496.2822068	7044.149901	905.9984754	2143.194376	194.7859753	310.626646
110.7390662	1113.231817	988.8943087	39847.73142	496.3103206	7044.550082	906.0495711	2143.83793	194.7920118	310.6326293
110.7924528	1113.268475	989.2807689	39853.04998	496.3273349	7044.819418	906.0808872	2144.298567	194.8110189	310.6514683
110.8458394	1113.308896	989.4771011	39858.36428	496.3452056	7045.09328	906.1136487	2144.7589	194.8258753	310.6661935
110.9107284	1113.363	989.4643406	39864.8178	496.3680585	7045.432127	906.1553793	2145.318004	194.8384443	310.6786515
110.9842391	1113.431122	989.1048653	39872.12124	496.3955028	7045.824222	906.205279	2145.950855	194.8451518	310.6852997
111.0511066	1113.494315	988.7127346	39878.75576	496.4207339	7046.182043	906.2511163	2146.525942	194.8498162	310.6899229
111.1052059	1113.527637	989.2811495	39884.10996	496.4370402	7046.448707	906.2812528	2146.990537	194.8728583	310.7127613
111.1554549	1113.561668	989.6531962	39889.07905	496.4528863	7046.700077	906.3104263	2147.421782	194.8908557	310.7305997
111.2140892	1113.608436	989.7325356	39894.87373	496.4729902	7047.002068	906.3471935	2147.924695	194.9041197	310.7437465
111.285217	1113.670166	989.5755651	39901.89587	496.4985128	7047.374354	906.39371	2148.534261	194.914679	310.7542125
111.3576049	1113.741281	988.9978373	39909.03531	496.5263783	7047.763306	906.4442428	2149.154099	194.9163053	310.7558244
111.4174245	1113.787093	989.1635574	39914.92226	496.5464122	7048.067983	906.4809361	2149.665625	194.9316349	310.7710185
111.4675933	1113.816344	989.7578289	39919.85042	496.5610954	7048.311658	906.5081242	2150.094143	194.9543922	310.7935748
111.5206321	1113.855929	989.9517248	39925.05844	496.5786022	7048.580018	906.5402196	2150.546961	194.9689842	310.8080378
111.5860973	1113.9099	989.9327559	39931.48095	496.6013744	7048.917407	906.581799	2151.105461	194.9813564	310.8203006
111.6605805	1113.978879	989.5290137	39938.78084	496.6290094	7049.310436	906.6320193	2151.740357	194.9870925	310.8259861
111.7139672	1114.014729	989.9150135	39944.00107	496.6456789	7049.57464	906.6627053	2152.194794	195.0058939	310.8446214
111.7673538	1114.054344	990.1107637	39949.21714	496.6632057	7049.84338	906.6948385	2152.648932	195.0205423	310.8591403
111.8322429	1114.107473	990.0971356	39955.55142	496.685642	7050.176011	906.7358075	2153.200511	195.0328553	310.8713445
111.9057537	1114.174497	989.7364579	39962.71997	496.7126158	7050.56108	906.7848472	2153.824846	195.0392682	310.8777008
111.9726213	1114.236693	989.343193	39969.23196	496.7374199	7050.912522	906.8299038	2154.392194	195.0436642	310.8820579
112.0267207	1114.269197	989.9112585	39974.48714	496.7533784	7051.174016	906.859405	2154.850532	195.0665017	310.9046936
112.0769697	1114.302473	990.282881	39979.36436	496.7689024	7051.420591	906.8879899	2155.275969	195.0843072	310.9223417
112.135604	1114.348364	990.3614994	39985.05196	496.7886318	7051.716999	906.9240727	2155.77211	195.0973425	310.9352618
112.2067319	1114.409035	990.2034947	39991.94438	496.8137015	7052.082525	906.9697612	2156.373469	195.1076212	310.9454498
112.27912	1114.479079	989.6244489	39998.95199	496.8411079	7052.464615	907.0194548	2156.984962	195.1089565	310.9467733
112.3389396	1114.524	989.7894894	40004.73014	496.8607611	7052.763617	907.0554523	2157.489598	195.1240549	310.9617382
112.3891085	1114.552498	990.3834831	40009.56716	496.8751239	7053.002532	907.0820552	2157.912341	195.1466249	310.9841088
112.4421473	1114.591293	990.5768087	40014.67891	496.8922937	7053.265871	907.1135347	2158.359059	195.1610129	310.9983697
112.5076126	1114.644294	990.5569733	40020.98276	496.9146513	7053.597075	907.1543562	2158.910034	195.1731302	311.0103799
112.582096	1114.712176	990.1520048	40028.14783	496.9418162	7053.983082	907.2037173	2159.536379	195.1785715	311.015773
112.6354827	1114.747231	990.5375528	40033.27154	496.9581473	7054.242249	907.2337849	2159.984691	195.1971711	311.0342083
112.6888694	1114.786056	990.7327316	40038.39121	496.9753366	7054.50596	907.2653013	2160.432709	195.2116153	311.0485248
112.7537585	1114.838228	990.718252	40044.60845	496.9973638	7054.832491	907.3055227	2160.976855	195.2236768	311.0604798
112.8272694	1114.904173	990.3563941	40051.64461	497.023876	7055.210664	907.3537185	2161.592777	195.2298007	311.0665496
112.8941371	1114.96539	989.9620159	40058.03634	497.0482608	7055.555842	907.3980087	2162.152479	195.2339332	311.0706456
112.9482365	1114.997093	990.5297384	40063.19433	497.063878	7055.812261	907.4268863	2162.604636	195.25657	311.0930823
112.9984856	1115.029626	990.9009446	40067.98138	497.0790858	7056.054129	907.4548934	2163.024336	195.274187	311.1105436
113.05712	1115.074657	990.9788552	40073.56387	497.0984476	7056.345057	907.4903044	2163.513788	195.2869978	311.1232413
113.1282479	1115.134289	990.8198354	40080.32896	497.1230727	7056.703948	907.5351803	2164.107039	195.2970012	311.1331562
113.2006361	1115.203282	990.2394959	40087.20719	497.1500286	7057.079302	907.5840502	2164.710289	195.2980509	311.1341967
113.2604558	1115.247327	990.4038694	40092.87856	497.169308	7057.372735	907.6193647	2165.208119	195.3129223	311.1489367
113.3106248	1115.275086	990.9975903	40097.62611	497.1833565	7057.606977	907.6453933	2165.625158	195.3353084	311.171125
113.3636636	1115.313106	991.1903562	40102.64338	497.2001955	7057.865387	907.6762683	2166.065849	195.3494963	311.1851875
113.4291289	1115.365155	991.1696702	40108.83076	497.222146	7058.190519	907.7163457	2166.609392	195.3613634	311.1969497
113.5036124	1115.431959	990.7634981	40115.8635	497.2488496	7058.569634	907.7648635	2167.22729	195.3665152	311.202056
113.5569992	1115.466235	991.1486026	40120.89249	497.2648484	7058.823856	907.7943241	2167.669552	195.3849167	311.2202949
113.610386	1115.504283	991.3432207	40125.91753	497.2817065	7059.082632	907.8252351	2168.111523	195.3991605	311.2344128
113.6752752	1115.555516	991.3279052	40132.0199	497.3033323	7059.403174	907.8647227	2168.648326	195.4109753	311.2461233
113.7487861	1115.620403	990.9648889	40138.9261	497.3293912	7059.774578	907.9120901	2169.255938	195.4168155	311.2519118
113.8156539	1115.68066	990.5694179	40145.19979	497.3533646	7060.113608	907.9556282	2169.808088	195.4206894	311.2557515
113.8697535	1115.711575	991.1368038	40150.2624	497.3686468	7060.365045	907.9838937	2170.25414	195.4431291	311.2779928
113.9200026	1115.74338	991.5076013	40154.96094	497.3835441	7060.602293	908.0113335	2170.668173	195.4605611	311.2952708
113.978637	1115.787566	991.5848173	40160.44027	497.4025452	7060.887841	908.0460851	2171.151016	195.4731516	311.3077501
114.049765	1115.846178	991.4248011	40167.08039	497.4267339	7061.240219	908.0901634	2171.736258	195.4828846	311.3173971
114.1221534	1115.914139	990.8431917	40173.83162	497.4532475	7061.608961	908.1382248	2172.331366	195.4836541	311.3181598
114.1819731	1115.957325	991.0069105	40179.39817	497.4721601	7061.896927	908.1728689	2172.822473	195.4983028	311.332679
114.2321421	1115.984359	991.6003637	40184.05791	497.4859	7062.126581	908.1983337	2173.233877	195.5205084	311.3546884
114.285181	1116.021618	991.7925801	40188.98245	497.5024143	7062.380153	908.2286154	2173.668615	195.5344998	311.3685562
114.3506463	1116.072732	991.7710594	40195.05551	497.5239653	7062.699325	908.2679626	2174.204817	195.5461213	311.380075
114.42513	1116.138478	991.3637058	40201.95837	497.550216	7063.071675	908.3156526	2174.81437	195.550989	311.3848997
114.4785168	1116.171989	991.748375	40206.89438	497.5658888	7063.321044	908.3445174	2175.250655	195.5691961	311.4029459
114.5319036	1116.209275	991.9424427	40211.82655	497.5824217	7063.574973	908.3748341	2175.686655	195.5832431	311.4168688
114.5967929	1116.259586	991.9263068	40217.81617	497.6036534	7063.889637	908.4136016	2176.216205	195.5948158	311.4283392
114.670304	1116.323434	991.5621534	40224.59482	497.6292675	7064.254396	908.4601558	2176.815608	195.6003775	311.4338517
114.7371718	1116.382748	991.1656097	40230.75265	497.652837	7064.587391	908.5029556	2177.360298	195.6039975	311.4374398
114.7912714	1116.412891	991.7326652	40235.72164	497.6677904	7064.833938	908.5306203	2177.800319	195.6262438	311.4594894
114.8415206	1116.44398	992.1030616	40240.33331	497.682383	7065.066651	908.5575034	2178.208754	195.6434942	311.4765875
114.900155	1116.487337	992.1795958	40245.71139	497.7010299	7065.346919	908.5916078	2178.68507	195.6558685	311.4888524
114.9712832	1116.544947	992.0186016	40252.22884	497.7247903	7065.692903	908.6349032	2179.262401	195.6653362	311.4982364
115.0436716	1116.611896	991.4357457	40258.85542	497.7508698	7066.055154	908.682171	2179.849466	195.6658305	311.4987264
115.1034915	1116.654238	991.5988219	40264.3191	497.7694224	7066.337753	908.7161571	2180.333932	195.6802606	311.5130289
115.1536605	1116.68056	992.1920123	40268.89265	497.7828594	7066.562905	908.7410685	2180.739771	195.702289	311.5348627
115.2066994	1116.717072	992.3836895	40273.72617	497.799055	7066.811728	908.7707678	2181.168628	195.7160876	311.5485394
115.2721648	1116.767268	992.3613493	40279.68702	497.8202138	7067.125049	908.8093982	2181.697579	195.727468	311.5598192
115.3466486	1116.831977	991.9528361	40286.4624	497.8460201	7067.490758	908.8562757	2182.298889	195.7320569	311.5643676
115.4000354	1116.864737	992.337078	40291.30716	497.8613728	7067.735363	908.8845557	2182.729271	195.7500732	311.5822246
115.4534223	1116.901275	992.5306054	40296.14817	497.8775865	7067.984536	908.9142891	2183.159371	195.7639271	311.5959561
115.5183117	1116.95068	992.5136642	40302.02712	497.8984314	7068.29343	908.9523496	2183.681758	195.7752621	311.6071909
115.5918228	1117.013508	992.1483948	40308.68058	497.9236089	7068.651666	908.9981057	2184.273052	195.7805504	311.6124325
115.6586908	1117.071897	991.7507983	40314.7247	497.946782	7068.978737	909.0401808	2184.810373	195.7839213	311.6157737
115.7127904	1117.101281	992.3175294	40319.60179	497.9614126	7069.220484	909.0672558	2185.244437	195.8059777	311.6376351
115.7630396	1117.131669	992.687532	40324.12819	497.9757062	7069.448745	909.0935925	2185.647343	195.82305	311.6545565
115.8216741	1117.174211	992.763397	40329.40689	497.9940055	7069.723829	909.1270616	2186.117212	195.8352119	311.666611
115.8928023	1117.230839	992.6014428	40335.80395	498.0173455	7070.063538	909.1695886	2186.686729	195.8444192	311.675737
115.9651909	1117.296794	992.0173635	40342.30819	498.0429989	7070.419417	909.2160774	2187.265849	195.8446435	311.6759593
116.0250108	1117.338308	992.1798089	40347.67089	498.0611981	7070.696749	909.2494177	2187.743756	195.858859	311.6900491
116.0751799	1117.36393	992.7727414	40352.15985	498.0743377	7070.91748	909.2737859	2188.144097	195.8807135	311.7117105
116.1282188	1117.399709	992.9638893	40356.90403	498.0902205	7071.161642	909.3029135	2188.567146	195.8943229	311.7251996
116.1936843	1117.449005	992.9407448	40362.75474	498.1109944	7071.46922	909.3408404	2189.088934	195.9054667	311.736245
116.2681682	1117.512695	992.5310934	40369.40501	498.1363644	7071.82841	909.3869203	2189.682102	195.9097818	311.740522
116.3215551	1117.544717	992.9149158	40374.16019	498.151403	7072.068338	909.4146264	2190.106654	195.9276107	311.7581934
116.374942	1117.580521	993.1079129	40378.91172	498.1673034	7072.312842	909.4437873	2190.530928	195.9412751	311.771737
116.4398314	1117.629038	993.0901813	40384.68206	498.1877687	7072.616072	909.4811539	2191.046238	195.9523768	311.7827406
116.5133427	1117.690865	992.7238164	40391.21265	498.2125176	7072.967905	909.5261265	2191.629524	195.9573968	311.7877163
116.5802107	1117.748345	992.3251865	40397.14515	498.2353016	7073.289162	909.5674903	2192.159566	195.9605232	311.790815
116.6343104	1117.776985	992.8915993	40401.93204	498.2496154	7073.526196	909.5939865	2192.587746	195.9823932	311.8124917
116.6845597	1117.806684	993.2612154	40406.37475	498.2636154	7073.750087	909.6197869	2192.98519	195.9992906	311.8292398
116.7431942	1117.848427	993.3364235	40411.55591	498.2815735	7074.020084	909.6526324	2193.448691	196.0112442	311.8410878
116.8143225	1117.90409	993.1735271	40417.8348	498.3045008	7074.353632	909.6944051	2194.010491	196.0201959	311.8499604
116.8867112	1117.969069	992.5882468	40424.21895	498.329736	7074.703257	909.7401293	2194.581764	196.0201551	311.84992
116.9465312	1118.00977	992.7500731	40429.48255	498.3475883	7074.975417	909.7728356	2195.053192	196.0341599	311.863801
116.9967003	1118.034707	993.3427525	40433.88848	498.3604361	7075.19181	909.7966707	2195.448103	196.0558438	311.8852932
117.0497392	1118.069766	993.5333807	40438.54497	498.3760119	7075.431396	909.8252372	2195.865416	196.0692674	311.8985983
117.1152047	1118.118177	993.5094468	40444.28758	498.396408	7075.733337	909.8624736	2196.380128	196.0801789	311.9094134
117.1896887	1118.180867	993.0986782	40450.81504	498.4213497	7076.086127	909.9077707	2196.965255	196.0842255	311.9134241
117.2430757	1118.212166	993.4820889	40455.48231	498.43608	7076.321465	909.9349133	2197.384048	196.1018705	311.9309133
117.2964627	1118.247249	993.6745655	40460.14602	498.4516729	7076.561386	909.9635122	2197.802567	196.1153488	311.9442725
117.3613522	1118.294894	993.6560581	40465.80974	498.4717655	7076.859056	910.0001978	2198.310888	196.1262216	311.9550491
117.4348636	1118.355738	993.2886179	40472.21972	498.4960937	7077.204604	910.0444015	2198.886263	196.1309782	311.9597638
117.5017317	1118.412326	992.8889736	40478.04267	498.5184958	7077.520153	910.0850671	2199.409117	196.1338645	311.9626246
117.5558314	1118.440235	993.4550739	40482.74104	498.5324986	7077.752562	910.1109951	2199.831485	196.1555516	311.98412
117.6060807	1118.469257	993.8243107	40487.10161	498.5462106	7077.972164	910.136269	2200.223535	196.1722773	312.0006979
117.6647153	1118.510217	993.8988741	40492.18703	498.5638338	7078.237166	910.1685025	2200.680746	196.1840264	312.0123432
117.7358437	1118.564932	993.7350528	40498.34993	498.5863561	7078.564666	910.2095349	2201.234923	196.1927272	312.0209671
117.8082324	1118.628953	993.1485938	40504.61621	498.6111807	7078.908152	910.2545085	2201.798446	196.1924263	312.0206689
117.8680526	1118.668857	993.3098124	40509.78254	498.6286926	7079.175237	910.2865927	2202.263474	196.2062244	312.034345
117.9182217	1118.69312	993.9022433	40514.10697	498.6412539	7079.387371	910.3099044	2202.653022	196.2277407	312.0556712
117.9712606	1118.727473	994.0923615	40518.6774	498.6565283	7079.622465	910.3379202	2203.064669	196.240982	312.0687955
118.0367262	1118.775016	994.0676527	40524.31391	498.6765535	7079.918872	910.3744788	2203.572394	196.2516656	312.0793846
118.1112103	1118.836724	993.6557874	40530.72083	498.7010749	7080.265381	910.4190075	2204.149579	196.2554484	312.0831341
118.1645974	1118.867312	994.0387941	40535.30181	498.7155025	7080.496212	910.4455971	2204.562684	196.272913	312.1004443
118.2179844	1118.901688	994.2307598	40539.87932	498.7307936	7080.731635	910.4736444	2204.975518	196.2862087	312.1136225
118.282874	1118.948477	994.2114908	40545.4384	498.7505204	7081.023847	910.5096614	2205.476936	196.2968566	312.1241764
118.3563854	1119.008357	993.8429951	40551.73001	498.7744358	7081.363226	910.5531104	2206.044499	196.3013548	312.1286348
118.4232536	1119.064069	993.4423553	40557.44543	498.796463	7081.673172	910.5930907	2206.560253	196.3040055	312.1312621
118.4773534	1119.091261	994.0081489	40562.0569	498.8101606	7081.90104	910.6184611	2206.976881	196.3255131	312.1525796
118.5276027	1119.119619	994.3770133	40566.33685	498.8235897	7082.116432	910.6432182	2207.363603	196.3420703	312.1689905
118.5862373	1119.159809	994.4509438	40571.3283	498.8408842	7082.376531	910.674851	2207.814602	196.3536186	312.1804368
118.6573658	1119.213594	994.2862147	40577.37736	498.8630089	7082.698096	910.7151566	2208.36125	196.3620732	312.1888166
118.7297547	1119.276675	993.6985988	40583.52795	498.8874306	7083.035556	910.7593936	2208.917118	196.3615169	312.1882653
118.7895749	1119.315796	993.8592208	40588.5988	498.9046083	7083.297658	910.790867	2209.375827	196.375112	312.2017403
118.839744	1119.339398	994.4514078	40592.84325	498.9168885	7083.505611	910.8136651	2209.760078	196.3964639	312.2229034
118.892783	1119.373057	994.6410255	40597.3292	498.9318671	7083.736296	910.8411403	2210.166129	196.4095262	312.2358504
118.9582486	1119.419748	994.615556	40602.86158	498.9515283	7084.027271	910.8770336	2210.666952	196.4199861	312.2462178
119.0327329	1119.480493	994.2026144	40609.15018	498.9756371	7084.367615	910.9208081	2211.236293	196.4235101	312.2497107
119.08612	1119.510384	994.5852244	40613.64646	498.9897676	7084.594023	910.9468548	2211.64378	196.4407975	312.2668453
119.1395071	1119.544065	994.7766887	40618.13937	499.0047624	7084.82503	910.9743608	2212.051001	196.453914	312.2798459
119.2043967	1119.590013	994.7566722	40623.59575	499.0241303	7085.111884	911.0097216	2212.545601	196.4643414	312.2901811
119.2779082	1119.648946	994.3871406	40629.77116	499.0476403	7085.445207	911.0524297	2213.105447	196.4685858	312.2943881
119.3447765	1119.7038	993.9855234	40635.38105	499.0692996	7085.749653	911.0917374	2213.614189	196.4710053	312.2967862
119.3988763	1119.730287	994.551016	40639.90723	499.0826976	7085.973065	911.1165604	2214.025148	196.4923366	312.3179289
119.4491257	1119.757994	994.919515	40644.10805	499.0958491	7086.184323	911.1408103	2214.406609	196.5087284	312.3341759
119.5077603	1119.797428	994.9928243	40649.00726	499.112821	7086.43961	911.1718534	2214.851473	196.5200797	312.3454269
119.5788889	1119.850301	994.8272041	40654.94458	499.1345554	7086.755348	911.2114457	2215.390684	196.5282926	312.3535672
119.6512779	1119.912459	994.2384525	40660.98163	499.1585817	7087.086892	911.2549597	2215.938993	196.5274857	312.3527674
119.7110981	1119.950811	994.3984891	40665.95876	499.1754313	7087.344104	911.2858336	2216.391459	196.5408816	312.366045
119.7612673	1119.973763	994.9904367	40670.1247	499.1874355	7087.547953	911.3081275	2216.770479	196.562072	312.3870482
119.8143063	1120.006742	995.179563	40674.52774	499.2021237	7087.77431	911.3350721	2217.171003	196.5749587	312.399821
119.879772	1120.052597	995.153347	40679.9579	499.2214277	7088.059954	911.3703124	2217.665011	196.5851989	312.4099707
119.9542563	1120.112396	994.7393488	40686.13038	499.2451315	7088.394245	911.4133466	2218.226605	196.5884689	312.4132118
120.0076435	1120.141602	995.1215695	40690.54353	499.2589704	7088.616311	911.4388606	2218.628543	196.6055825	312.4301742
120.0610306	1120.174601	995.3125416	40694.95341	499.2736745	7088.842983	911.4658351	2219.03022	196.618523	312.4430003
120.1259203	1120.219725	995.2917914	40700.30897	499.2926899	7089.124579	911.5005519	2219.518087	196.6287338	312.4531209
120.1994319	1120.277729	994.9212429	40706.37035	499.3158022	7089.451957	911.5425328	2220.070312	196.6327293	312.457081
120.2663003	1120.331738	994.5186666	40711.87664	499.3371002	7089.751004	911.5811802	2220.572128	196.6349218	312.4592542
120.3204002	1120.357535	995.0838636	40716.31912	499.3502042	7089.970042	911.6054659	2220.977489	196.6560801	312.4802255
120.3706496	1120.384602	995.4520039	40720.44227	499.3630832	7090.177243	911.629218	2221.353753	196.6723095	312.4963116
120.4292843	1120.423294	995.5247034	40725.25095	499.3797384	7090.427806	911.6596823	2221.792558	196.6834675	312.5073709
120.5004129	1120.475271	995.3582086	40731.07859	499.4010898	7090.737824	911.6985746	2222.324426	196.6914431	312.515276
120.572802	1120.536523	994.7683424	40737.00419	499.4247278	7091.063562	911.7413788	2222.865268	196.6903902	312.5142324
120.6326223	1120.574121	994.9278043	40741.88935	499.4412555	7091.315973	911.7716643	2223.31157	196.7035906	312.5273162
120.6827915	1120.596436	995.5195168	40745.97822	499.4529888	7091.515794	911.7934633	2223.685423	196.7246226	312.5481624
120.7358305	1120.628747	995.7081609	40750.29988	499.4673921	7091.737902	911.8198871	2224.08049	196.7373369	312.5607643
120.8012963	1120.673781	995.6812121	40755.62972	499.4863453	7092.018312	911.8544864	2224.567766	196.7473615	312.5707004
120.8757808	1120.732651	995.2661769	40761.68822	499.5096516	7092.346662	911.896794	2225.121709	196.7503822	312.5736943
120.929168	1120.761185	995.6480155	40766.01978	499.5232044	7092.564466	911.921785	2225.518168	196.7673251	312.5904875
120.9825552	1120.793516	995.8385044	40770.34815	499.537623	7092.786884	911.9482379	2225.914369	196.7800929	312.6031425
121.0474449	1120.83783	995.817034	40775.60476	499.5562925	7093.063317	911.9823225	2226.395586	196.7900912	312.6130525
121.1209566	1120.894921	995.4454875	40781.55421	499.5790143	7093.384861	912.0235896	2226.940286	196.7938422	312.6167703
121.187825	1120.948103	995.0419696	40786.95883	499.5999579	7093.678608	912.061589	2227.435262	196.7958119	312.6187226
121.241925	1120.97322	995.6068766	40791.31914	499.6127732	7093.893351	912.0853474	2227.835094	196.8168004	312.6395256
121.2921744	1120.99966	995.9746648	40795.36606	499.6253848	7094.09657	912.1086108	2228.206226	196.8328706	312.6554538
121.3508091	1121.037624	996.0467658	40800.08588	499.6417291	7094.342496	912.138507	2228.639047	196.8438387	312.666325
121.4219378	1121.088721	995.8794125	40805.80588	499.6627046	7094.6469	912.176712	2229.163663	196.8515814	312.6739993
121.494327	1121.149084	995.2884522	40811.62209	499.6859615	7094.966938	912.2188196	2229.697131	196.850287	312.6727164
121.5541474	1121.185941	995.44735	40816.41696	499.7021731	7095.214636	912.2485276	2230.137346	196.8632955	312.6856099
121.6043167	1121.207631	996.0388319	40820.43021	499.7136406	7095.410503	912.2698409	2230.506097	196.884172	312.7063019
121.6573557	1121.239286	996.2270026	40824.67199	499.7277641	7095.628442	912.2957535	2230.895773	196.8967171	312.7187361
121.7228215	1121.283514	996.1993345	40829.90336	499.7463731	7095.903714	912.3297236	2231.376401	196.9065302	312.7284625
121.7973061	1121.341473	995.7832815	40835.84999	499.7692893	7096.226232	912.371318	2231.922788	196.9093061	312.7312139
121.8506933	1121.369348	996.164745	40840.10146	499.7825611	7096.439853	912.3957957	2232.313836	196.9260815	312.747841
121.9040806	1121.401021	996.3547596	40844.34983	499.7966995	7096.658094	912.4217366	2232.70463	196.9386798	312.7603281
121.9689704	1121.44454	996.3325824	40849.50933	499.8150296	7096.92946	912.4552006	2233.17928	196.9484695	312.7700312
122.0424822	1121.500736	995.9600562	40855.34891	499.8373681	7097.245276	912.4957672	2233.716547	196.9519806	312.7735112
122.1093507	1121.553105	995.5556142	40860.65374	499.8579637	7097.533822	912.5331305	2234.20477	196.9537316	312.7752468
122.1634507	1121.577557	996.1202365	40864.9334	499.8704957	7097.744349	912.5563713	2234.599141	196.9745534	312.7958847
122.2137001	1121.60338	996.487679	40868.90549	499.8828449	7097.943659	912.5791551	2234.965205	196.9904672	312.8116578
[truncated: 1,917 more rows]
